# Supplementary material for: Deep Genomic Divergence and Phenotypic Admixture of the Treefrog Dendropsophus elegans (Hylidae: Amphibia) Coincide With Riverine Boundaries at the Brazilian Atlantic Forest
Source: Frontiers journal article supplement (doi:10.3389/fevo.2022.765977), 2022-03-04
Supplement: Data_Sheet_2.docx [file Data_Sheet_2.docx]

Supplementary Material 2

# Supplementary Data

*Herpetological Collections for morphology and morphometric samples*

CFBH - Coleção Célio Fernando Baptista Haddad, Universidade Estadual Paulista, Rio Claro, São Paulo

CHBEZ - Coleção Herpetológica do Departamento de Botânica, Ecologia e Zoologia, Universidade Federal do Rio Grande do Norte, Natal

INPA - Instituto Nacional de Pesquisas da Amazônia, Manaus, Amazonas

MHNCI - Museu de História Natural Capão da Imbuia, Curitiba, Paraná

MPEG - Museu Paraense Emílio Goeldi, Belém, Pará

MNRJ - Museu Nacional, Rio de Janeiro

MZUEFS - Museu de Zoologia, Universidade Estadual de Feira de Santana, Bahia

MZUFV - Museu de Zoologia João Moojen de Oliveira‖, Universidade Federal de Viçosa, Minas Gerais

MZUSP - Museu de Zoologia da Universidade de São Paulo, São Paulo

UFBA - Museu de Zoologia da Universidade Federal da Bahia, Salvador, Bahia

UESC – Universidade Estadual de Santa Cruz

ZUFRJ - Coleção de Anfíbios do Departamento de Zoologia da Universidade Federal do Estado do Rio de Janeiro, Rio de Janeiro

# Supplementary Figures and Tables

**Supplementary Table S1.** Specimens’ localities information used for the morphometric measurements, including the population name, locality and geographic coordinates for *Dendropsophus elegans* species.

| **Samples N.** | **Population** | **Locality** | **Latitude** | **Longitude** |
| --- | --- | --- | --- | --- |
| UFBA 2453 | North | Camurujipe, Mata de São João - BA | -12.5391667 | -38.01 |
| UFBA 7351 | North | Camurujipe, Mata de São João - BA | -12.5391667 | -38.01 |
| UFBA 7352 | North | Camurujipe, Mata de São João - BA | -12.5391667 | -38.01 |
| UFBA 6043 | North | Camurujipe, Mata de São João - BA | -12.5391667 | -38.01 |
| UFBA 6211 | North | Camurujipe, Mata de São João - BA | -12.5391667 | -38.01 |
| UFBA 6212 | North | Camurujipe, Mata de São João - BA | -12.5391667 | -38.01 |
| UFBA 4334 | North | Camurujipe, Mata de São João - BA | -12.5391667 | -38.01 |
| UFBA 4335 | North | Camurujipe, Mata de São João - BA | -12.5391667 | -38.01 |
| UFBA 4336 | North | Camurujipe, Mata de São João - BA | -12.5391667 | -38.01 |
| UFBA 4337 | North | Camurujipe, Mata de São João - BA | -12.5391667 | -38.01 |
| UFBA 4338 | North | Camurujipe, Mata de São João - BA | -12.5391667 | -38.01 |
| UFBA 4339 | North | Camurujipe, Mata de São João - BA | -12.5391667 | -38.01 |
| UFBA 4340 | North | Camurujipe, Mata de São João - BA | -12.5391667 | -38.01 |
| UFBA 4341 | North | Camurujipe, Mata de São João - BA | -12.5391667 | -38.01 |
| UFBA 4342 | North | Camurujipe, Mata de São João - BA | -12.5391667 | -38.01 |
| UFBA 4343 | North | Camurujipe, Mata de São João - BA | -12.5391667 | -38.01 |
| UFBA 2623 | North | Camurujipe, Mata de São João - BA | -12.5391667 | -38.01 |
| UFBA 2624 | North | Camurujipe, Mata de São João - BA | -12.5391667 | -38.01 |
| UFBA 2625 | North | Camurujipe, Mata de São João - BA | -12.5391667 | -38.01 |
| UFBA 2626 | North | Camurujipe, Mata de São João - BA | -12.5391667 | -38.01 |
| UFBA 2627 | North | Camurujipe, Mata de São João - BA | -12.5391667 | -38.01 |
| UFBA 2628 | North | Camurujipe, Mata de São João - BA | -12.5391667 | -38.01 |
| UFBA 2629 | North | Camurujipe, Mata de São João - BA | -12.5391667 | -38.01 |
| UFBA 2630 | North | Camurujipe, Mata de São João - BA | -12.5391667 | -38.01 |
| UFBA 2631 | North | Camurujipe, Mata de São João - BA | -12.5391667 | -38.01 |
| UFBA 2632 | North | Camurujipe, Mata de São João - BA | -12.5391667 | -38.01 |
| UFBA 2633 | North | Camurujipe, Mata de São João - BA | -12.5391667 | -38.01 |
| UFBA 2634 | North | Camurujipe, Mata de São João - BA | -12.5391667 | -38.01 |
| UFBA 2635 | North | Camurujipe, Mata de São João - BA | -12.5391667 | -38.01 |
| UFBA 2636 | North | Camurujipe, Mata de São João - BA | -12.5391667 | -38.01 |
| UFBA 2637 | North | Camurujipe, Mata de São João - BA | -12.5391667 | -38.01 |
| UFBA 2638 | North | Camurujipe, Mata de São João - BA | -12.5391667 | -38.01 |
| UFBA 2639 | North | Camurujipe, Mata de São João - BA | -12.5391667 | -38.01 |
| UFBA 2677 | North | Camurujipe, Mata de São João - BA | -12.5391667 | -38.01 |
| UFBA 2678 | North | Camurujipe, Mata de São João - BA | -12.5391667 | -38.01 |
| UFBA 2679 | North | Camurujipe, Mata de São João - BA | -12.5391667 | -38.01 |
| UFBA 2680 | North | Camurujipe, Mata de São João - BA | -12.5391667 | -38.01 |
| UFBA 2681 | North | Camurujipe, Mata de São João - BA | -12.5391667 | -38.01 |
| UFBA 2682 | North | Camurujipe, Mata de São João - BA | -12.5391667 | -38.01 |
| UFBA 2683 | North | Camurujipe, Mata de São João - BA | -12.5391667 | -38.01 |
| UFBA 2684 | North | Camurujipe, Mata de São João - BA | -12.5391667 | -38.01 |
| UFBA 2685 | North | Camurujipe, Mata de São João - BA | -12.5391667 | -38.01 |
| UFBA 2686 | North | Camurujipe, Mata de São João - BA | -12.5391667 | -38.01 |
| UFBA 2687 | North | Camurujipe, Mata de São João - BA | -12.5391667 | -38.01 |
| UFBA 2848 | North | Camurujipe, Mata de São João - BA | -12.5391667 | -38.01 |
| UFBA 2769 | North | Camurujipe, Mata de São João - BA | -12.5391667 | -38.01 |
| UFBA 2770 | North | Camurujipe, Mata de São João - BA | -12.5391667 | -38.01 |
| UFBA 2771 | North | Camurujipe, Mata de São João - BA | -12.5391667 | -38.01 |
| UFBA 2772 | North | Camurujipe, Mata de São João - BA | -12.5391667 | -38.01 |
| UFBA 8006 | North | Camurujipe, Mata de São João - BA | -12.5391667 | -38.01 |
| UFBA 8007 | North | Camurujipe, Mata de São João - BA | -12.5391667 | -38.01 |
| UFBA 8008 | North | Camurujipe, Mata de São João - BA | -12.5391667 | -38.01 |
| UFBA 8009 | North | Camurujipe, Mata de São João - BA | -12.5391667 | -38.01 |
| UFBA 8010 | North | Camurujipe, Mata de São João - BA | -12.5391667 | -38.01 |
| UFBA 7867 | North | Camurujipe, Mata de São João - BA | -12.5391667 | -38.01 |
| UFBA 7870 | North | Camurujipe, Mata de São João - BA | -12.5391667 | -38.01 |
| UFBA 7871 | North | Camurujipe, Mata de São João - BA | -12.5391667 | -38.01 |
| UFBA 7872 | North | Camurujipe, Mata de São João - BA | -12.5391667 | -38.01 |
| UFBA 7873 | North | Camurujipe, Mata de São João - BA | -12.5391667 | -38.01 |
| UFBA 7874 | North | Camurujipe, Mata de São João - BA | -12.5391667 | -38.01 |
| UFBA 7875 | North | Camurujipe, Mata de São João - BA | -12.5391667 | -38.01 |
| UFBA 7876 | North | Camurujipe, Mata de São João - BA | -12.5391667 | -38.01 |
| UFBA 7877 | North | Camurujipe, Mata de São João - BA | -12.5391667 | -38.01 |
| UFBA 7878 | North | Camurujipe, Mata de São João - BA | -12.5391667 | -38.01 |
| UFBA 8222 | North | Camurujipe, Mata de São João - BA | -12.5391667 | -38.01 |
| UFBA 8223 | North | Camurujipe, Mata de São João - BA | -12.5391667 | -38.01 |
| UFBA 8224 | North | Camurujipe, Mata de São João - BA | -12.5391667 | -38.01 |
| UFBA 4430 | North | Amargosa, Serra do Timbó - BA | -13.0302778 | -39.6047222 |
| UFBA 6468 | North | Amargosa, Serra do Timbó - BA | -13.0302778 | -39.6047222 |
| UFBA 5868 | North |  |  |  |
| UFBA 2061 | North | Est. Ecológica Veracruz, Porto Seguro - BA | -16.8080556 | -39.1477778 |
| MZUSP 126388 | North | Est. Ecológica Veracruz, Porto Seguro - BA | -16.8080556 | -39.1477778 |
| MZUSP 126389 | North | Est. Ecológica Veracruz, Porto Seguro - BA | -16.8080556 | -39.1477778 |
| MZUSP 126390 | North | Est. Ecológica Veracruz, Porto Seguro - BA | -16.8080556 | -39.1477778 |
| MZUSP 126391 | North | Est. Ecológica Veracruz, Porto Seguro - BA | -16.8080556 | -39.1477778 |
| MZUSP 126392 | North | Est. Ecológica Veracruz, Porto Seguro - BA | -16.8080556 | -39.1477778 |
| MZUSP 126393 | North | Est. Ecológica Veracruz, Porto Seguro - BA | -16.8080556 | -39.1477778 |
| MZUSP 126394 | North | Est. Ecológica Veracruz, Porto Seguro - BA | -16.8080556 | -39.1477778 |
| MZUSP 126395 | North | Est. Ecológica Veracruz, Porto Seguro - BA | -16.8080556 | -39.1477778 |
| MZUSP 126397 | North | Est. Ecológica Veracruz, Porto Seguro - BA | -16.8080556 | -39.1477778 |
| MZUSP 126398 | North | Est. Ecológica Veracruz, Porto Seguro - BA | -16.8080556 | -39.1477778 |
| MZUSP 126399 | North | Est. Ecológica Veracruz, Porto Seguro - BA | -16.8080556 | -39.1477778 |
| MZUSP 126400 | North | Est. Ecológica Veracruz, Porto Seguro - BA | -16.8080556 | -39.1477778 |
| MZUSP 126401 | North | Est. Ecológica Veracruz, Porto Seguro - BA | -16.8080556 | -39.1477778 |
| MZUSP 126402 | North | Est. Ecológica Veracruz, Porto Seguro - BA | -16.8080556 | -39.1477778 |
| MZUSP 126403 | North | Est. Ecológica Veracruz, Porto Seguro - BA | -16.8080556 | -39.1477778 |
| MZUSP 126404 | North | Est. Ecológica Veracruz, Porto Seguro - BA | -16.8080556 | -39.1477778 |
| MZUSP 126405 | North | Est. Ecológica Veracruz, Porto Seguro - BA | -16.8080556 | -39.1477778 |
| MZUSP 126406 | North | Est. Ecológica Veracruz, Porto Seguro - BA | -16.8080556 | -39.1477778 |
| MZUSP 126407 | North | Est. Ecológica Veracruz, Porto Seguro - BA | -16.8080556 | -39.1477778 |
| MZUSP 126409 | North | Est. Ecológica Veracruz, Porto Seguro - BA | -16.8080556 | -39.1477778 |
| MZUSP 126410 | North | Est. Ecológica Veracruz, Porto Seguro - BA | -16.8080556 | -39.1477778 |
| UFBA 3954 | North | Pratigi, Taperoá - BA | -13.5380556 | -39.0986111 |
| UFBA 3955 | North | Pratigi, Taperoá - BA | -13.5380556 | -39.0986111 |
| UFBA 7577 | North | Reserva Peninha, Cachoeira - BA | -12.6183333 | -38.9558333 |
| UFBA 7578 | North | Reserva Peninha, Cachoeira - BA | -12.6183333 | -38.9558333 |
| UFBA 7579 | North | Reserva Peninha, Cachoeira - BA | -12.6183333 | -38.9558333 |
| UFBA 7580 | North | Reserva Peninha, Cachoeira - BA | -12.6183333 | -38.9558333 |
| UFBA 7581 | North | Reserva Peninha, Cachoeira - BA | -12.6183333 | -38.9558333 |
| UFBA 3103 | North | Ituberá - BA | -13.7322222 | -39.1491667 |
| UFBA 3104 | North | Ituberá - BA | -13.7322222 | -39.1491667 |
| UFBA 3105 | North | Ituberá - BA | -13.7322222 | -39.1491667 |
| UFBA 3106 | North | Ituberá - BA | -13.7322222 | -39.1491667 |
| UFBA 3107 | North | Ituberá - BA | -13.7322222 | -39.1491667 |
| UFBA 3108 | North | Ituberá - BA | -13.7322222 | -39.1491667 |
| UFBA 3109 | North | Ituberá - BA | -13.7322222 | -39.1491667 |
| UFBA 3110 | North | Ituberá - BA | -13.7322222 | -39.1491667 |
| UFBA 3111 | North | Ituberá - BA | -13.7322222 | -39.1491667 |
| UFBA 3112 | North | Ituberá - BA | -13.7322222 | -39.1491667 |
| UFBA 3113 | North | Ituberá - BA | -13.7322222 | -39.1491667 |
| UFBA 3114 | North | Ituberá - BA | -13.7322222 | -39.1491667 |
| UFBA 3116 | North | Ituberá - BA | -13.7322222 | -39.1491667 |
| UFBA 3117 | North | Ituberá - BA | -13.7322222 | -39.1491667 |
| UFBA 3118 | North | Ituberá - BA | -13.7322222 | -39.1491667 |
| MNRJ 46374 | Contact Zone | Santa Rita de Ibitipoca - MG | -21.5627778 | -43.9147222 |
| MNRJ 46375 | Contact Zone | Santa Rita de Ibitipoca - MG | -21.5627778 | -43.9147222 |
| MNRJ 46376 | Contact Zone | Santa Rita de Ibitipoca - MG | -21.5627778 | -43.9147222 |
| MNRJ 46377 | Contact Zone | Santa Rita de Ibitipoca - MG | -21.5627778 | -43.9147222 |
| MNRJ 46378 | Contact Zone | Santa Rita de Ibitipoca - MG | -21.5627778 | -43.9147222 |
| MNRJ 46379 | Contact Zone | Santa Rita de Ibitipoca - MG | -21.5627778 | -43.9147222 |
| MNRJ 46380 | Contact Zone | Santa Rita de Ibitipoca - MG | -21.5627778 | -43.9147222 |
| MNRJ 46381 | Contact Zone | Santa Rita de Ibitipoca - MG | -21.5627778 | -43.9147222 |
| MNRJ 46382 | Contact Zone | Santa Rita de Ibitipoca - MG | -21.5627778 | -43.9147222 |
| MNRJ 46383 | Contact Zone | Santa Rita de Ibitipoca - MG | -21.5627778 | -43.9147222 |
| MNRJ 46384 | Contact Zone | Santa Rita de Ibitipoca - MG | -21.5627778 | -43.9147222 |
| MNRJ 46385 | Contact Zone | Santa Rita de Ibitipoca - MG | -21.5627778 | -43.9147222 |
| MNRJ 46386 | Contact Zone | Santa Rita de Ibitipoca - MG | -21.5627778 | -43.9147222 |
| MNRJ 46387 | Contact Zone | Santa Rita de Ibitipoca - MG | -21.5627778 | -43.9147222 |
| MNRJ 46388 | Contact Zone | Santa Rita de Ibitipoca - MG | -21.5627778 | -43.9147222 |
| MNRJ 46389 | Contact Zone | Santa Rita de Ibitipoca - MG | -21.5627778 | -43.9147222 |
| MNRJ 46390 | Contact Zone | Santa Rita de Ibitipoca - MG | -21.5627778 | -43.9147222 |
| MNRJ 46391 | Contact Zone | Santa Rita de Ibitipoca - MG | -21.5627778 | -43.9147222 |
| MNRJ 26275 | Contact Zone | Santa Rita de Ibitipoca - MG | -21.5627778 | -43.9147222 |
| MNRJ 26276 | Contact Zone | Santa Rita de Ibitipoca - MG | -21.5627778 | -43.9147222 |
| MNRJ 26277 | Contact Zone | Santa Rita de Ibitipoca - MG | -21.5627778 | -43.9147222 |
| MNRJ 26278 | Contact Zone | Santa Rita de Ibitipoca - MG | -21.5627778 | -43.9147222 |
| MNRJ 46433 | Contact Zone | Santa Rita de Ibitipoca - MG | -21.5627778 | -43.9147222 |
| MNRJ 46434 | Contact Zone | Santa Rita de Ibitipoca - MG | -21.5627778 | -43.9147222 |
| MNRJ 46435 | Contact Zone | Santa Rita de Ibitipoca - MG | -21.5627778 | -43.9147222 |
| MNRJ 46436 | Contact Zone | Santa Rita de Ibitipoca - MG | -21.5627778 | -43.9147222 |
| MNRJ 46437 | Contact Zone | Santa Rita de Ibitipoca - MG | -21.5627778 | -43.9147222 |
| MNRJ 46438 | Contact Zone | Santa Rita de Ibitipoca - MG | -21.5627778 | -43.9147222 |
| MNRJ 15519 | North | Marliéria - MG | -19.7119444 | -42.7322222 |
| MNRJ 15520 | North | Marliéria - MG | -19.7119444 | -42.7322222 |
| MNRJ 15521 | North | Marliéria - MG | -19.7119444 | -42.7322222 |
| MNRJ 15522 | North | Marliéria - MG | -19.7119444 | -42.7322222 |
| MNRJ 15523 | North | Marliéria - MG | -19.7119444 | -42.7322222 |
| MNRJ 15524 | North | Marliéria - MG | -19.7119444 | -42.7322222 |
| MNRJ 15525 | North | Marliéria - MG | -19.7119444 | -42.7322222 |
| MNRJ 15526 | North | Marliéria - MG | -19.7119444 | -42.7322222 |
| MNRJ 15527 | North | Marliéria - MG | -19.7119444 | -42.7322222 |
| MNRJ 15528 | North | Marliéria - MG | -19.7119444 | -42.7322222 |
| MNRJ 15529 | North | Marliéria - MG | -19.7119444 | -42.7322222 |
| MNRJ 15530 | North | Marliéria - MG | -19.7119444 | -42.7322222 |
| MNRJ 15531 | North | Marliéria - MG | -19.7119444 | -42.7322222 |
| MNRJ 15532 | North | Marliéria - MG | -19.7119444 | -42.7322222 |
| MNRJ 15533 | North | Marliéria - MG | -19.7119444 | -42.7322222 |
| MNRJ 15534 | North | Marliéria - MG | -19.7119444 | -42.7322222 |
| MNRJ 15535 | North | Marliéria - MG | -19.7119444 | -42.7322222 |
| MNRJ 15536 | North | Marliéria - MG | -19.7119444 | -42.7322222 |
| MNRJ 15537 | North | Marliéria - MG | -19.7119444 | -42.7322222 |
| MNRJ 35736 | North | Marliéria - MG | -19.7119444 | -42.7322222 |
| MNRJ 35738 | North | Marliéria - MG | -19.7119444 | -42.7322222 |
| MNRJ 35739 | North | Marliéria - MG | -19.7119444 | -42.7322222 |
| MNRJ 35740 | North | Marliéria - MG | -19.7119444 | -42.7322222 |
| MNRJ 35741 | North | Marliéria - MG | -19.7119444 | -42.7322222 |
| MNRJ 35742 | North | Marliéria - MG | -19.7119444 | -42.7322222 |
| MNRJ 35743 | North | Marliéria - MG | -19.7119444 | -42.7322222 |
| MNRJ 35744 | North | Marliéria - MG | -19.7119444 | -42.7322222 |
| MNRJ 35745 | North | Marliéria - MG | -19.7119444 | -42.7322222 |
| MNRJ 29644 | North | Conceição da Barra - ES | -18.5933333 | -39.7322222 |
| MNRJ 29645 | North | Conceição da Barra - ES | -18.5933333 | -39.7322222 |
| MNRJ 29646 | North | Conceição da Barra - ES | -18.5933333 | -39.7322222 |
| MNRJ 29647 | North | Conceição da Barra - ES | -18.5933333 | -39.7322222 |
| MNRJ 29648 | North | Conceição da Barra - ES | -18.5933333 | -39.7322222 |
| MNRJ 29649 | North | Conceição da Barra - ES | -18.5933333 | -39.7322222 |
| MNRJ 30067 | North | Conceição da Barra - ES | -18.5933333 | -39.7322222 |
| MNRJ 30068 | North | Conceição da Barra - ES | -18.5933333 | -39.7322222 |
| MNRJ 30069 | North | Conceição da Barra - ES | -18.5933333 | -39.7322222 |
| MNRJ 30070 | North | Conceição da Barra - ES | -18.5933333 | -39.7322222 |
| MNRJ 30071 | North | Conceição da Barra - ES | -18.5933333 | -39.7322222 |
| MNRJ 30072 | North | Conceição da Barra - ES | -18.5933333 | -39.7322222 |
| MNRJ 30073 | North | Conceição da Barra - ES | -18.5933333 | -39.7322222 |
| MNRJ 30074 | North | Conceição da Barra - ES | -18.5933333 | -39.7322222 |
| MNRJ 30075 | North | Conceição da Barra - ES | -18.5933333 | -39.7322222 |
| MNRJ 30076 | North | Conceição da Barra - ES | -18.5933333 | -39.7322222 |
| MNRJ 30077 | North | Conceição da Barra - ES | -18.5933333 | -39.7322222 |
| MNRJ 30078 | North | Conceição da Barra - ES | -18.5933333 | -39.7322222 |
| MNRJ 30079 | North | Conceição da Barra - ES | -18.5933333 | -39.7322222 |
| MNRJ 30080 | North | Conceição da Barra - ES | -18.5933333 | -39.7322222 |
| MNRJ 29855 | North | Conceição da Barra - ES | -18.5933333 | -39.7322222 |
| MNRJ 29856 | North | Conceição da Barra - ES | -18.5933333 | -39.7322222 |
| MNRJ 29857 | North | Conceição da Barra - ES | -18.5933333 | -39.7322222 |
| MNRJ 29858 | North | Conceição da Barra - ES | -18.5933333 | -39.7322222 |
| MNRJ 29859 | North | Conceição da Barra - ES | -18.5933333 | -39.7322222 |
| MNRJ 29860 | North | Conceição da Barra - ES | -18.5933333 | -39.7322222 |
| MNRJ 29861 | North | Conceição da Barra - ES | -18.5933333 | -39.7322222 |
| MNRJ 29862 | North | Conceição da Barra - ES | -18.5933333 | -39.7322222 |
| MNRJ 29863 | North | Conceição da Barra - ES | -18.5933333 | -39.7322222 |
| MNRJ 29864 | North | Conceição da Barra - ES | -18.5933333 | -39.7322222 |
| MNRJ 29865 | North | Conceição da Barra - ES | -18.5933333 | -39.7322222 |
| MNRJ 29866 | North | Conceição da Barra - ES | -18.5933333 | -39.7322222 |
| MNRJ 29867 | North | Conceição da Barra - ES | -18.5933333 | -39.7322222 |
| MNRJ 29868 | North | Conceição da Barra - ES | -18.5933333 | -39.7322222 |
| MNRJ 29869 | North | Conceição da Barra - ES | -18.5933333 | -39.7322222 |
| MNRJ 29870 | North | Conceição da Barra - ES | -18.5933333 | -39.7322222 |
| MNRJ 29871 | North | Conceição da Barra - ES | -18.5933333 | -39.7322222 |
| MNRJ 29872 | North | Conceição da Barra - ES | -18.5933333 | -39.7322222 |
| MNRJ 29873 | North | Conceição da Barra - ES | -18.5933333 | -39.7322222 |
| MNRJ 29068 | North | Conceição da Barra - ES | -18.5933333 | -39.7322222 |
| MNRJ 29069 | North | Conceição da Barra - ES | -18.5933333 | -39.7322222 |
| MNRJ 29070 | North | Conceição da Barra - ES | -18.5933333 | -39.7322222 |
| MNRJ 29071 | North | Conceição da Barra - ES | -18.5933333 | -39.7322222 |
| MNRJ 29079 | North | Conceição da Barra - ES | -18.5933333 | -39.7322222 |
| MNRJ 43025 | South | Rio de Janeiro - RJ | -22.9027778 | -43.2075 |
| MNRJ 43026 | South | Rio de Janeiro - RJ | -22.9027778 | -43.2075 |
| MNRJ 43027 | South | Rio de Janeiro - RJ | -22.9027778 | -43.2075 |
| MNRJ 43028 | South | Rio de Janeiro - RJ | -22.9027778 | -43.2075 |
| MNRJ 43029 | South | Rio de Janeiro - RJ | -22.9027778 | -43.2075 |
| MNRJ 43030 | South | Rio de Janeiro - RJ | -22.9027778 | -43.2075 |
| MNRJ 43031 | South | Rio de Janeiro - RJ | -22.9027778 | -43.2075 |
| MNRJ 43032 | South | Rio de Janeiro - RJ | -22.9027778 | -43.2075 |
| MNRJ 43033 | South | Rio de Janeiro - RJ | -22.9027778 | -43.2075 |
| MZUSP 77861 | South | Rio de Janeiro - RJ | -22.9027778 | -43.2075 |
| MZUSP 3639 | South | Rio de Janeiro - RJ | -22.9027778 | -43.2075 |
| MZUSP 3640 | South | Rio de Janeiro - RJ | -22.9027778 | -43.2075 |
| MZUSP 3641 | South | Rio de Janeiro - RJ | -22.9027778 | -43.2075 |
| MZUSP 118018 | South | Rio de Janeiro - RJ | -22.9027778 | -43.2075 |
| MZUSP 118020 | South | Rio de Janeiro - RJ | -22.9027778 | -43.2075 |
| MZUSP 118021 | South | Rio de Janeiro - RJ | -22.9027778 | -43.2075 |
| MNRJ 42948 | South | Rio de Janeiro - RJ | -22.9027778 | -43.2075 |
| MNRJ 42960 | South | Rio de Janeiro - RJ | -22.9027778 | -43.2075 |
| MNRJ 42961 | South | Rio de Janeiro - RJ | -22.9027778 | -43.2075 |
| MNRJ 42962 | South | Rio de Janeiro - RJ | -22.9027778 | -43.2075 |
| MNRJ 42988 | South | Rio de Janeiro - RJ | -22.9027778 | -43.2075 |
| MNRJ 42989 | South | Rio de Janeiro - RJ | -22.9027778 | -43.2075 |
| MNRJ 40148 | South | Rio de Janeiro - RJ | -22.9027778 | -43.2075 |
| MNRJ 36003 | South | Tinguá, Nova Iguaçu - RJ | -22.7591667 | -43.4511111 |
| MNRJ 36004 | South | Tinguá, Nova Iguaçu - RJ | -22.7591667 | -43.4511111 |
| MNRJ 36005 | South | Tinguá, Nova Iguaçu - RJ | -22.7591667 | -43.4511111 |
| MNRJ 36006 | South | Tinguá, Nova Iguaçu - RJ | -22.7591667 | -43.4511111 |
| MNRJ 36007 | South | Tinguá, Nova Iguaçu - RJ | -22.7591667 | -43.4511111 |
| MZUSP 118019 | South | Tinguá, Nova Iguaçu - RJ | -22.7591667 | -43.4511111 |
| MNRJ 37195 | South | Três Rios - RJ | -22.1166667 | -43.2091667 |
| MNRJ 37196 | South | Três Rios - RJ | -22.1166667 | -43.2091667 |
| MNRJ 37197 | South | Três Rios - RJ | -22.1166667 | -43.2091667 |
| MNRJ 37198 | South | Três Rios - RJ | -22.1166667 | -43.2091667 |
| MNRJ 37199 | South | Três Rios - RJ | -22.1166667 | -43.2091667 |
| MNRJ 37200 | South | Três Rios - RJ | -22.1166667 | -43.2091667 |
| MNRJ 37201 | South | Três Rios - RJ | -22.1166667 | -43.2091667 |
| MNRJ 37202 | South | Três Rios - RJ | -22.1166667 | -43.2091667 |
| MNRJ 50350 | South | Três Rios - RJ | -22.1166667 | -43.2091667 |
| MNRJ 50351 | South | Três Rios - RJ | -22.1166667 | -43.2091667 |
| MNRJ 31321 | North | Prado - BA | -17.3411111 | -39.2208333 |
| MNRJ 31322 | North | Prado - BA | -17.3411111 | -39.2208333 |
| MNRJ 31323 | North | Prado - BA | -17.3411111 | -39.2208333 |
| MNRJ 31324 | North | Prado - BA | -17.3411111 | -39.2208333 |
| MNRJ 31325 | North | Prado - BA | -17.3411111 | -39.2208333 |
| MNRJ 31326 | North | Prado - BA | -17.3411111 | -39.2208333 |
| MNRJ 31327 | North | Prado - BA | -17.3411111 | -39.2208333 |
| UFBA 8921 | North | Prado - BA | -17.3411111 | -39.2208333 |
| UFBA 8922 | North | Prado - BA | -17.3411111 | -39.2208333 |
| UFBA 8923 | North | Prado - BA | -17.3411111 | -39.2208333 |
| UFBA 8924 | North | Prado - BA | -17.3411111 | -39.2208333 |
| UFBA 8925 | North | Prado - BA | -17.3411111 | -39.2208333 |
| UFBA 8926 | North | Prado - BA | -17.3411111 | -39.2208333 |
| MNRJ 47400 | South | Rebio União, Macaé - RJ | -22.3708333 | -41.7869444 |
| MNRJ 47401 | South | Rebio União, Macaé - RJ | -22.3708333 | -41.7869444 |
| MNRJ 47402 | South | Rebio União, Macaé - RJ | -22.3708333 | -41.7869444 |
| MNRJ 47403 | South | Rebio União, Macaé - RJ | -22.3708333 | -41.7869444 |
| MNRJ 47404 | South | Rebio União, Macaé - RJ | -22.3708333 | -41.7869444 |
| MNRJ 47405 | South | Rebio União, Macaé - RJ | -22.3708333 | -41.7869444 |
| MNRJ 47406 | South | Rebio União, Macaé - RJ | -22.3708333 | -41.7869444 |
| MNRJ 47407 | South | Rebio União, Macaé - RJ | -22.3708333 | -41.7869444 |
| MNRJ 47408 | South | Rebio União, Macaé - RJ | -22.3708333 | -41.7869444 |
| MNRJ 47409 | South | Rebio União, Macaé - RJ | -22.3708333 | -41.7869444 |
| MNRJ 47410 | South | Rebio União, Macaé - RJ | -22.3708333 | -41.7869444 |
| MNRJ 47411 | South | Rebio União, Macaé - RJ | -22.3708333 | -41.7869444 |
| MNRJ 47412 | South | Rebio União, Macaé - RJ | -22.3708333 | -41.7869444 |
| MNRJ 47413 | South | Rebio União, Macaé - RJ | -22.3708333 | -41.7869444 |
| MNRJ 37345 | South | Rebio União, Macaé - RJ | -22.3708333 | -41.7869444 |
| MNRJ 37346 | South | Rebio União, Macaé - RJ | -22.3708333 | -41.7869444 |
| MNRJ 37347 | South | Rebio União, Macaé - RJ | -22.3708333 | -41.7869444 |
| MNRJ 37348 | South | Rebio União, Macaé - RJ | -22.3708333 | -41.7869444 |
| MNRJ 37349 | South | Rebio União, Macaé - RJ | -22.3708333 | -41.7869444 |
| MNRJ 37350 | South | Rebio União, Macaé - RJ | -22.3708333 | -41.7869444 |
| MNRJ 37351 | South | Rebio União, Macaé - RJ | -22.3708333 | -41.7869444 |
| MNRJ 37352 | South | Rebio União, Macaé - RJ | -22.3708333 | -41.7869444 |
| MNRJ 43999 | South | Rebio União, Macaé - RJ | -22.3708333 | -41.7869444 |
| MNRJ 47806 | North | Trancoso - BA | -16.4497222 | -39.0647222 |
| MNRJ 47807 | North | Trancoso - BA | -16.4497222 | -39.0647222 |
| MNRJ 47808 | North | Trancoso - BA | -16.4497222 | -39.0647222 |
| MNRJ 47809 | North | Trancoso - BA | -16.4497222 | -39.0647222 |
| MNRJ 47810 | North | Trancoso - BA | -16.4497222 | -39.0647222 |
| MNRJ 47268 | South | Rio das Ostras - RJ | -22.5269444 | -41.945 |
| MNRJ 47269 | South | Rio das Ostras - RJ | -22.5269444 | -41.945 |
| MNRJ 47270 | South | Rio das Ostras - RJ | -22.5269444 | -41.945 |
| MNRJ 47271 | South | Rio das Ostras - RJ | -22.5269444 | -41.945 |
| MNRJ 47272 | South | Rio das Ostras - RJ | -22.5269444 | -41.945 |
| MNRJ 38198 | South | Rio das Ostras - RJ | -22.5269444 | -41.945 |
| MNRJ 37339 | South | Rio das Ostras - RJ | -22.5269444 | -41.945 |
| MNRJ 37340 | South | Rio das Ostras - RJ | -22.5269444 | -41.945 |
| MNRJ 39505 | South | Rio das Ostras - RJ | -22.5269444 | -41.945 |
| MNRJ 27870 | Contact Zone | Cariacica - ES | -20.2638889 | -40.42 |
| MNRJ 27871 | Contact Zone | Cariacica - ES | -20.2638889 | -40.42 |
| MNRJ 27872 | Contact Zone | Cariacica - ES | -20.2638889 | -40.42 |
| MNRJ 27873 | Contact Zone | Cariacica - ES | -20.2638889 | -40.42 |
| MNRJ 27874 | Contact Zone | Cariacica - ES | -20.2638889 | -40.42 |
| MNRJ 27881 | Contact Zone | Cariacica - ES | -20.2638889 | -40.42 |
| MNRJ 27882 | Contact Zone | Cariacica - ES | -20.2638889 | -40.42 |
| MNRJ 27884 | Contact Zone | Cariacica - ES | -20.2638889 | -40.42 |
| MNRJ 27885 | Contact Zone | Cariacica - ES | -20.2638889 | -40.42 |
| MNRJ 28430 | Contact Zone | Cariacica - ES | -20.2638889 | -40.42 |
| MNRJ 22807 | North | Linhares - ES | -19.3911111 | -40.0722222 |
| MNRJ 22808 | North | Linhares - ES | -19.3911111 | -40.0722222 |
| MNRJ 22809 | North | Linhares - ES | -19.3911111 | -40.0722222 |
| MNRJ 16866 | North | Linhares - ES | -19.3911111 | -40.0722222 |
| MNRJ 16867 | North | Linhares - ES | -19.3911111 | -40.0722222 |
| MNRJ 16868 | North | Linhares - ES | -19.3911111 | -40.0722222 |
| MNRJ 16869 | North | Linhares - ES | -19.3911111 | -40.0722222 |
| MNRJ 16870 | North | Linhares - ES | -19.3911111 | -40.0722222 |
| MNRJ 7915 | North | Linhares - ES | -19.3911111 | -40.0722222 |
| MNRJ 7916 | North | Linhares - ES | -19.3911111 | -40.0722222 |
| MNRJ 3850 | North | Linhares - ES | -19.3911111 | -40.0722222 |
| MNRJ 37446 | North | Linhares - ES | -19.3911111 | -40.0722222 |
| MNRJ 37447 | North | Linhares - ES | -19.3911111 | -40.0722222 |
| MNRJ 36057 | North | Linhares - ES | -19.3911111 | -40.0722222 |
| MNRJ 36058 | North | Linhares - ES | -19.3911111 | -40.0722222 |
| MNRJ 40874 | North | Linhares - ES | -19.3911111 | -40.0722222 |
| MNRJ 40875 | North | Linhares - ES | -19.3911111 | -40.0722222 |
| MNRJ 49624 | Contact Zone | Comendador Levy Gasparin - RJ | -22.0286111 | -43.205 |
| MNRJ 49625 | Contact Zone | Comendador Levy Gasparin - RJ | -22.0286111 | -43.205 |
| MNRJ 49626 | Contact Zone | Comendador Levy Gasparin - RJ | -22.0286111 | -43.205 |
| MNRJ 49627 | Contact Zone | Comendador Levy Gasparin - RJ | -22.0286111 | -43.205 |
| MNRJ 49628 | Contact Zone | Comendador Levy Gasparin - RJ | -22.0286111 | -43.205 |
| MNRJ 49629 | Contact Zone | Comendador Levy Gasparin - RJ | -22.0286111 | -43.205 |
| MNRJ 49630 | Contact Zone | Comendador Levy Gasparin - RJ | -22.0286111 | -43.205 |
| MNRJ 49731 | Contact Zone | Comendador Levy Gasparin - RJ | -22.0286111 | -43.205 |
| MNRJ 38426 | Contact Zone | Santa Teresa - ES | -19.9355556 | -40.6002778 |
| MNRJ 38427 | Contact Zone | Santa Teresa - ES | -19.9355556 | -40.6002778 |
| MNRJ 28333 | Contact Zone | Santa Teresa - ES | -19.9355556 | -40.6002778 |
| MNRJ 28334 | Contact Zone | Santa Teresa - ES | -19.9355556 | -40.6002778 |
| MNRJ 28335 | Contact Zone | Santa Teresa - ES | -19.9355556 | -40.6002778 |
| MNRJ 30443 | Contact Zone | Santa Teresa - ES | -19.9355556 | -40.6002778 |
| MNRJ 30444 | Contact Zone | Santa Teresa - ES | -19.9355556 | -40.6002778 |
| MNRJ 30037 | Contact Zone | Santa Teresa - ES | -19.9355556 | -40.6002778 |
| MNRJ 40684 | Contact Zone | Santa Teresa - ES | -19.9355556 | -40.6002778 |
| MNRJ 40685 | Contact Zone | Santa Teresa - ES | -19.9355556 | -40.6002778 |
| MNRJ 40686 | Contact Zone | Santa Teresa - ES | -19.9355556 | -40.6002778 |
| MNRJ 56051 | Contact Zone | Santa Teresa - ES | -19.9355556 | -40.6002778 |
| MNRJ 56052 | Contact Zone | Santa Teresa - ES | -19.9355556 | -40.6002778 |
| MNRJ 56053 | Contact Zone | Santa Teresa - ES | -19.9355556 | -40.6002778 |
| MNRJ 56054 | Contact Zone | Santa Teresa - ES | -19.9355556 | -40.6002778 |
| MNRJ 56055 | Contact Zone | Santa Teresa - ES | -19.9355556 | -40.6002778 |
| MNRJ 56056 | Contact Zone | Santa Teresa - ES | -19.9355556 | -40.6002778 |
| MNRJ 40480 | North | Mascote - BA | -15.5630556 | -39.3025 |
| MNRJ 40481 | North | Mascote - BA | -15.5630556 | -39.3025 |
| MNRJ 42606 | North | Veracel, Porto Seguro - BA | -16.4497222 | -39.0647222 |
| MNRJ 42607 | North | Veracel, Porto Seguro - BA | -16.4497222 | -39.0647222 |
| MNRJ 42608 | North | Veracel, Porto Seguro - BA | -16.4497222 | -39.0647222 |
| MNRJ 42609 | North | Veracel, Porto Seguro - BA | -16.4497222 | -39.0647222 |
| MNRJ 42610 | North | Veracel, Porto Seguro - BA | -16.4497222 | -39.0647222 |
| MNRJ 42611 | North | Veracel, Porto Seguro - BA | -16.4497222 | -39.0647222 |
| MNRJ 25614 | North | Veracel, Porto Seguro - BA | -16.4497222 | -39.0647222 |
| MNRJ 25615 | North | Veracel, Porto Seguro - BA | -16.4497222 | -39.0647222 |
| MNRJ 25616 | North | Veracel, Porto Seguro - BA | -16.4497222 | -39.0647222 |
| MNRJ 25620 | North | Veracel, Porto Seguro - BA | -16.4497222 | -39.0647222 |
| MNRJ 25621 | North | Veracel, Porto Seguro - BA | -16.4497222 | -39.0647222 |
| MZUSP 63206 | North | Veracel, Porto Seguro - BA | -16.4497222 | -39.0647222 |
| MZUSP 63207 | North | Veracel, Porto Seguro - BA | -16.4497222 | -39.0647222 |
| UFBA 9587 | North | Veracel, Porto Seguro - BA | -16.4497222 | -39.0647222 |
| UFBA 9588 | North | Veracel, Porto Seguro - BA | -16.4497222 | -39.0647222 |
| UFBA 9589 | North | Veracel, Porto Seguro - BA | -16.4497222 | -39.0647222 |
| UFBA 9590 | North | Veracel, Porto Seguro - BA | -16.4497222 | -39.0647222 |
| UFBA 9591 | North | Veracel, Porto Seguro - BA | -16.4497222 | -39.0647222 |
| UFBA 9592 | North | Veracel, Porto Seguro - BA | -16.4497222 | -39.0647222 |
| UFBA 9593 | North | Veracel, Porto Seguro - BA | -16.4497222 | -39.0647222 |
| UFBA 9594 | North | Veracel, Porto Seguro - BA | -16.4497222 | -39.0647222 |
| UFBA 9595 | North | Veracel, Porto Seguro - BA | -16.4497222 | -39.0647222 |
| UFBA 9596 | North | Veracel, Porto Seguro - BA | -16.4497222 | -39.0647222 |
| MNRJ 36954 | North | Valença - BA | -13.3702778 | -39.0730556 |
| MNRJ 15508 | North | Valença - BA | -13.3702778 | -39.0730556 |
| MNRJ 31796 | South | Morretes - PR | -25.4769444 | -48.8344444 |
| MNRJ 31797 | South | Morretes - PR | -25.4769444 | -48.8344444 |
| MNRJ 30377 | South | Morretes - PR | -25.4769444 | -48.8344444 |
| MNRJ 30378 | South | Morretes - PR | -25.4769444 | -48.8344444 |
| MNRJ 30379 | South | Morretes - PR | -25.4769444 | -48.8344444 |
| MNRJ 30380 | South | Morretes - PR | -25.4769444 | -48.8344444 |
| MNRJ 30381 | South | Morretes - PR | -25.4769444 | -48.8344444 |
| MNRJ 29756 | South | Morretes - PR | -25.4769444 | -48.8344444 |
| MNRJ 29857 | South | Morretes - PR | -25.4769444 | -48.8344444 |
| UFBA 8446 | South | Morretes - PR | -25.4769444 | -48.8344444 |
| UFBA 8447 | South | Morretes - PR | -25.4769444 | -48.8344444 |
| UFBA 8448 | South | Morretes - PR | -25.4769444 | -48.8344444 |
| UFBA 8449 | South | Morretes - PR | -25.4769444 | -48.8344444 |
| UFBA 8450 | South | Morretes - PR | -25.4769444 | -48.8344444 |
| UFBA 8451 | South | Morretes - PR | -25.4769444 | -48.8344444 |
| UFBA 8452 | South | Morretes - PR | -25.4769444 | -48.8344444 |
| UFBA 8453 | South | Morretes - PR | -25.4769444 | -48.8344444 |
| UFBA 8454 | South | Morretes - PR | -25.4769444 | -48.8344444 |
| UFBA 8455 | South | Morretes - PR | -25.4769444 | -48.8344444 |
| UFBA 8456 | South | Morretes - PR | -25.4769444 | -48.8344444 |
| UFBA 8457 | South | Morretes - PR | -25.4769444 | -48.8344444 |
| UFBA 8458 | South | Morretes - PR | -25.4769444 | -48.8344444 |
| UFBA 8459 | South | Morretes - PR | -25.4769444 | -48.8344444 |
| UFBA 8460 | South | Morretes - PR | -25.4769444 | -48.8344444 |
| UFBA 8461 | South | Morretes - PR | -25.4769444 | -48.8344444 |
| UFBA 8462 | South | Morretes - PR | -25.4769444 | -48.8344444 |
| UFBA 8463 | South | Morretes - PR | -25.4769444 | -48.8344444 |
| UFBA 8464 | South | Morretes - PR | -25.4769444 | -48.8344444 |
| MHNCI 1399 | South | Morretes - PR | -25.4769444 | -48.8344444 |
| MHNCI 1400 | South | Morretes - PR | -25.4769444 | -48.8344444 |
| MHNCI 1401 | South | Morretes - PR | -25.4769444 | -48.8344444 |
| MHNCI 1402 | South | Morretes - PR | -25.4769444 | -48.8344444 |
| MHNCI 1403 | South | Morretes - PR | -25.4769444 | -48.8344444 |
| MHNCI 1404 | South | Morretes - PR | -25.4769444 | -48.8344444 |
| MHNCI 1405 | South | Morretes - PR | -25.4769444 | -48.8344444 |
| MHNCI 1406 | South | Morretes - PR | -25.4769444 | -48.8344444 |
| MNRJ 29453 | South | Maricá - RJ | -22.9194444 | -42.8186111 |
| MNRJ 29454 | South | Maricá - RJ | -22.9194444 | -42.8186111 |
| MNRJ 29455 | South | Maricá - RJ | -22.9194444 | -42.8186111 |
| MNRJ 29456 | South | Maricá - RJ | -22.9194444 | -42.8186111 |
| MNRJ 29703 | South | Maricá - RJ | -22.9194444 | -42.8186111 |
| MNRJ 29704 | South | Maricá - RJ | -22.9194444 | -42.8186111 |
| MNRJ 29705 | South | Maricá - RJ | -22.9194444 | -42.8186111 |
| MNRJ 29706 | South | Maricá - RJ | -22.9194444 | -42.8186111 |
| MNRJ 29707 | South | Maricá - RJ | -22.9194444 | -42.8186111 |
| MNRJ 29708 | South | Maricá - RJ | -22.9194444 | -42.8186111 |
| MNRJ 29709 | South | Maricá - RJ | -22.9194444 | -42.8186111 |
| MNRJ 29710 | South | Maricá - RJ | -22.9194444 | -42.8186111 |
| MNRJ 29711 | South | Maricá - RJ | -22.9194444 | -42.8186111 |
| MNRJ 29712 | South | Maricá - RJ | -22.9194444 | -42.8186111 |
| MNRJ 29713 | South | Maricá - RJ | -22.9194444 | -42.8186111 |
| MNRJ 29394 | South | Maricá - RJ | -22.9194444 | -42.8186111 |
| MNRJ 29431 | South | Maricá - RJ | -22.9194444 | -42.8186111 |
| MNRJ 29420 | South | Maricá - RJ | -22.9194444 | -42.8186111 |
| MNRJ 29427 | South | Maricá - RJ | -22.9194444 | -42.8186111 |
| MNRJ 29266 | South | Maricá - RJ | -22.9194444 | -42.8186111 |
| MNRJ 29300 | South | Maricá - RJ | -22.9194444 | -42.8186111 |
| MNRJ 29301 | South | Maricá - RJ | -22.9194444 | -42.8186111 |
| MNRJ 29302 | South | Maricá - RJ | -22.9194444 | -42.8186111 |
| MNRJ 29303 | South | Maricá - RJ | -22.9194444 | -42.8186111 |
| MNRJ 29304 | South | Maricá - RJ | -22.9194444 | -42.8186111 |
| MNRJ 29266 | South | Maricá - RJ | -22.9194444 | -42.8186111 |
| MNRJ 56484 | South | Maricá - RJ | -22.9194444 | -42.8186111 |
| MNRJ 56485 | South | Maricá - RJ | -22.9194444 | -42.8186111 |
| MNRJ 56486 | South | Maricá - RJ | -22.9194444 | -42.8186111 |
| MNRJ 46490 | North | Serra do Timorante, Valentin, Boa Nova - BA | -14.3625 | -40.2075 |
| MNRJ 46491 | North | Serra do Timorante, Valentin, Boa Nova - BA | -14.3625 | -40.2075 |
| MNRJ 46492 | North | Serra do Timorante, Valentin, Boa Nova - BA | -14.3625 | -40.2075 |
| MNRJ 29080 | north | Caravelas - BA | -17.7319444 | -39.2658333 |
| MNRJ 29081 | North | Caravelas - BA | -17.7319444 | -39.2658333 |
| CFBH 4066 | North | Caravelas - BA | -17.7319444 | -39.2658333 |
| MNRJ 31399 | North | Itagibá - BA | -14.2836111 | -39.8427778 |
| MNRJ 31401 | North | Itagibá - BA | -14.2836111 | -39.8427778 |
| MNRJ 31402 | North | Itagibá - BA | -14.2836111 | -39.8427778 |
| MNRJ 31404 | North | Itagibá - BA | -14.2836111 | -39.8427778 |
| MNRJ 31405 | North | Itagibá - BA | -14.2836111 | -39.8427778 |
| MNRJ 31446 | Contact Zone | Roça Grande - MG | -21.5666667 | -42.9666667 |
| MNRJ 31447 | Contact Zone | Roça Grande - MG | -21.5666667 | -42.9666667 |
| MNRJ 31448 | Contact Zone | Roça Grande - MG | -21.5666667 | -42.9666667 |
| MNRJ 31449 | Contact Zone | Roça Grande - MG | -21.5666667 | -42.9666667 |
| MNRJ 31450 | Contact Zone | Roça Grande - MG | -21.5666667 | -42.9666667 |
| MNRJ 31566 | Contact Zone | Roça Grande - MG | -21.5666667 | -42.9666667 |
| MNRJ 31567 | Contact Zone | Roça Grande - MG | -21.5666667 | -42.9666667 |
| MNRJ 38150 | North | Coruripe - AL | -10.1255556 | -36.1755556 |
| MNRJ 38151 | North | Coruripe - AL | -10.1255556 | -36.1755556 |
| MNRJ 30699 | North | Mairi - BA | -11.7113889 | -40.1488889 |
| MNRJ 30700 | North | Mairi - BA | -11.7113889 | -40.1488889 |
| MNRJ 34476 | South | Picinguaba, Ubatuba - SP | -23.3769444 | -44.8380556 |
| MNRJ 34477 | South | Picinguaba, Ubatuba - SP | -23.3769444 | -44.8380556 |
| MZUSP 70753 | South | Picinguaba, Ubatuba - SP | -23.3769444 | -44.8380556 |
| MZUSP 126223 | South | Picinguaba, Ubatuba - SP | -23.3769444 | -44.8380556 |
| MZUSP 126224 | South | Picinguaba, Ubatuba - SP | -23.3769444 | -44.8380556 |
| MZUSP 126225 | South | Picinguaba, Ubatuba - SP | -23.3769444 | -44.8380556 |
| MZUSP 126226 | South | Picinguaba, Ubatuba - SP | -23.3769444 | -44.8380556 |
| MZUSP 126227 | South | Picinguaba, Ubatuba - SP | -23.3769444 | -44.8380556 |
| MZUSP 126228 | South | Picinguaba, Ubatuba - SP | -23.3769444 | -44.8380556 |
| MZUSP 126229 | South | Picinguaba, Ubatuba - SP | -23.3769444 | -44.8380556 |
| MZUSP 126230 | South | Picinguaba, Ubatuba - SP | -23.3769444 | -44.8380556 |
| MZUSP 126231 | South | Picinguaba, Ubatuba - SP | -23.3769444 | -44.8380556 |
| MZUSP 126232 | South | Picinguaba, Ubatuba - SP | -23.3769444 | -44.8380556 |
| MZUSP 126233 | South | Picinguaba, Ubatuba - SP | -23.3769444 | -44.8380556 |
| MZUSP 126234 | South | Picinguaba, Ubatuba - SP | -23.3769444 | -44.8380556 |
| MZUSP 126235 | South | Picinguaba, Ubatuba - SP | -23.3769444 | -44.8380556 |
| MZUSP 126236 | South | Picinguaba, Ubatuba - SP | -23.3769444 | -44.8380556 |
| MZUSP 126237 | South | Picinguaba, Ubatuba - SP | -23.3769444 | -44.8380556 |
| MZUSP 126238 | South | Picinguaba, Ubatuba - SP | -23.3769444 | -44.8380556 |
| MZUSP 126239 | South | Picinguaba, Ubatuba - SP | -23.3769444 | -44.8380556 |
| MZUSP 126240 | South | Picinguaba, Ubatuba - SP | -23.3769444 | -44.8380556 |
| MZUSP 126241 | South | Picinguaba, Ubatuba - SP | -23.3769444 | -44.8380556 |
| CFBH 1060 | South | Picinguaba, Ubatuba - SP | -23.3769444 | -44.8380556 |
| CFBH 1253 | South | Picinguaba, Ubatuba - SP | -23.3769444 | -44.8380556 |
| CFBH 1255 | South | Picinguaba, Ubatuba - SP | -23.3769444 | -44.8380556 |
| CFBH 1256 | South | Picinguaba, Ubatuba - SP | -23.3769444 | -44.8380556 |
| CFBH 1388 | South | Picinguaba, Ubatuba - SP | -23.3769444 | -44.8380556 |
| CFBH 2099 | South | Picinguaba, Ubatuba - SP | -23.3769444 | -44.8380556 |
| CFBH 2100 | South | Picinguaba, Ubatuba - SP | -23.3769444 | -44.8380556 |
| CFBH 2101 | South | Picinguaba, Ubatuba - SP | -23.3769444 | -44.8380556 |
| MNRJ 27226 | North | Arataca - BA | -15.2633333 | -39.4144444 |
| MNRJ 27227 | North | Arataca - BA | -15.2633333 | -39.4144444 |
| MNRJ 27228 | North | Arataca - BA | -15.2633333 | -39.4144444 |
| MNRJ 27229 | North | Arataca - BA | -15.2633333 | -39.4144444 |
| UFBA 6671 | North | Itabuna - BA | -14.7855556 | -39.2802778 |
| UFBA 7967 | South | Parque do Zizo, São Miguel Arcanjo - SP | -23.8783333 | -47.9972222 |
| UFBA 7968 | South | Parque do Zizo, São Miguel Arcanjo - SP | -23.8783333 | -47.9972222 |
| UFBA 7969 | South | Parque do Zizo, São Miguel Arcanjo - SP | -23.8783333 | -47.9972222 |
| UFBA 7970 | South | Parque do Zizo, São Miguel Arcanjo - SP | -23.8783333 | -47.9972222 |
| UFBA 7971 | South | Parque do Zizo, São Miguel Arcanjo - SP | -23.8783333 | -47.9972222 |
| UFBA 7972 | South | Parque do Zizo, São Miguel Arcanjo - SP | -23.8783333 | -47.9972222 |
| UFBA 7973 | South | Parque do Zizo, São Miguel Arcanjo - SP | -23.8783333 | -47.9972222 |
| UFBA 7974 | South | Parque do Zizo, São Miguel Arcanjo - SP | -23.8783333 | -47.9972222 |
| UFBA 7975 | South | Parque do Zizo, São Miguel Arcanjo - SP | -23.8783333 | -47.9972222 |
| UFBA 7976 | South | Parque do Zizo, São Miguel Arcanjo - SP | -23.8783333 | -47.9972222 |
| MZUSP 135919 | South | Parque do Zizo, São Miguel Arcanjo - SP | -23.8783333 | -47.9972222 |
| MZUSP 135920 | South | Parque do Zizo, São Miguel Arcanjo - SP | -23.8783333 | -47.9972222 |
| MZUSP 135914 | South | Parque do Zizo, São Miguel Arcanjo - SP | -23.8783333 | -47.9972222 |
| MZUSP 135915 | South | Parque do Zizo, São Miguel Arcanjo - SP | -23.8783333 | -47.9972222 |
| MZUSP 135916 | South | Parque do Zizo, São Miguel Arcanjo - SP | -23.8783333 | -47.9972222 |
| MZUSP 135917 | South | Parque do Zizo, São Miguel Arcanjo - SP | -23.8783333 | -47.9972222 |
| MZUSP 135918 | South | Parque do Zizo, São Miguel Arcanjo - SP | -23.8783333 | -47.9972222 |
| MZUSP 135910 | South | Parque do Zizo, São Miguel Arcanjo - SP | -23.8783333 | -47.9972222 |
| MZUSP 135911 | South | Parque do Zizo, São Miguel Arcanjo - SP | -23.8783333 | -47.9972222 |
| MZUSP 135912 | South | Parque do Zizo, São Miguel Arcanjo - SP | -23.8783333 | -47.9972222 |
| MZUSP 135913 | South | Parque do Zizo, São Miguel Arcanjo - SP | -23.8783333 | -47.9972222 |
| UFBA 8465 | South | Parque do Zizo, São Miguel Arcanjo - SP | -23.8783333 | -47.9972222 |
| UFBA 8466 | South | Parque do Zizo, São Miguel Arcanjo - SP | -23.8783333 | -47.9972222 |
| UFBA 8467 | South | Parque do Zizo, São Miguel Arcanjo - SP | -23.8783333 | -47.9972222 |
| UFBA 8468 | South | Parque do Zizo, São Miguel Arcanjo - SP | -23.8783333 | -47.9972222 |
| UFBA 8469 | South | Parque do Zizo, São Miguel Arcanjo - SP | -23.8783333 | -47.9972222 |
| UFBA 8470 | South | Parque do Zizo, São Miguel Arcanjo - SP | -23.8783333 | -47.9972222 |
| UFBA 8471 | South | Parque do Zizo, São Miguel Arcanjo - SP | -23.8783333 | -47.9972222 |
| UFBA 8472 | South | Parque do Zizo, São Miguel Arcanjo - SP | -23.8783333 | -47.9972222 |
| UFBA 8473 | South | Parque do Zizo, São Miguel Arcanjo - SP | -23.8783333 | -47.9972222 |
| UFBA 8474 | South | Parque do Zizo, São Miguel Arcanjo - SP | -23.8783333 | -47.9972222 |
| UFBA 8475 | South | Parque do Zizo, São Miguel Arcanjo - SP | -23.8783333 | -47.9972222 |
| UFBA 8476 | South | Parque do Zizo, São Miguel Arcanjo - SP | -23.8783333 | -47.9972222 |
| UFBA 8477 | South | Parque do Zizo, São Miguel Arcanjo - SP | -23.8783333 | -47.9972222 |
| UFBA 8478 | South | Parque do Zizo, São Miguel Arcanjo - SP | -23.8783333 | -47.9972222 |
| UFBA 8479 | South | Parque do Zizo, São Miguel Arcanjo - SP | -23.8783333 | -47.9972222 |
| UFBA 8480 | South | Parque do Zizo, São Miguel Arcanjo - SP | -23.8783333 | -47.9972222 |
| UFBA 8481 | South | Parque do Zizo, São Miguel Arcanjo - SP | -23.8783333 | -47.9972222 |
| UFBA 8482 | South | Parque do Zizo, São Miguel Arcanjo - SP | -23.8783333 | -47.9972222 |
| UFBA 8483 | South | Parque do Zizo, São Miguel Arcanjo - SP | -23.8783333 | -47.9972222 |
| UFBA 8484 | South | Parque do Zizo, São Miguel Arcanjo - SP | -23.8783333 | -47.9972222 |
| UFBA 6673 | North | Teixeira de Freitas -BA | -17.535 | -39.7419444 |
| MZUSP 137960 | South | Guaraqueçaba - PR | -25.3066667 | -48.3288889 |
| MHNCI 2470 | South | Guaraqueçaba - PR | -25.3066667 | -48.3288889 |
| MZUSP 38032 | North | Areia Branca - SE | -10.7577778 | -37.3152778 |
| MZUSP 81131 | North | Una - BA | -15.2933333 | -39.0752778 |
| MZUSP 81132 | North | Una - BA | -15.2933333 | -39.0752778 |
| MNRJ 51726 | North | Una - BA | -15.2933333 | -39.0752778 |
| MNRJ 43518 | North | Una - BA | -15.2933333 | -39.0752778 |
| MZUSP 300 | Contact Zone | Juiz de Fora - MG | -21.7641667 | -43.3502778 |
| MZUSP 135139 | Contact Zone | Viana, Faz. Campo Verde - ES | -20.3902778 | -40.4961111 |
| MZUSP 135140 | Contact Zone | Viana, Faz. Campo Verde - ES | -20.3902778 | -40.4961111 |
| MZUSP 135141 | Contact Zone | Viana, Faz. Campo Verde - ES | -20.3902778 | -40.4961111 |
| MZUSP 135142 | Contact Zone | Viana, Faz. Campo Verde - ES | -20.3902778 | -40.4961111 |
| MZUSP 65258 | Contact Zone | Faz. Montesclaros, Caratinga - MG | -19.7897222 | -42.1391667 |
| MZUSP 65259 | Contact Zone | Faz. Montesclaros, Caratinga - MG | -19.7897222 | -42.1391667 |
| MZUSP 65260 | Contact Zone | Faz. Montesclaros, Caratinga - MG | -19.7897222 | -42.1391667 |
| MZUSP 7793 | North | Sooretama - ES | -19.1977778 | -40.0977778 |
| MZUSP 95600 | North | Sooretama - ES | -19.1977778 | -40.0977778 |
| MZUSP 95601 | North | Sooretama - ES | -19.1977778 | -40.0977778 |
| MZUSP 95602 | North | Sooretama - ES | -19.1977778 | -40.0977778 |
| MZUSP 95603 | North | Sooretama - ES | -19.1977778 | -40.0977778 |
| MZUSP 95604 | North | Sooretama - ES | -19.1977778 | -40.0977778 |
| MZUSP 95605 | North | Sooretama - ES | -19.1977778 | -40.0977778 |
| MZUSP 95606 | North | Sooretama - ES | -19.1977778 | -40.0977778 |
| MZUSP 95607 | North | Sooretama - ES | -19.1977778 | -40.0977778 |
| MZUSP 95608 | North | Sooretama - ES | -19.1977778 | -40.0977778 |
| MZUSP 95609 | North | Sooretama - ES | -19.1977778 | -40.0977778 |
| MZUSP 95610 | North | Sooretama - ES | -19.1977778 | -40.0977778 |
| MZUSP 95611 | North | Sooretama - ES | -19.1977778 | -40.0977778 |
| MZUSP 95612 | North | Sooretama - ES | -19.1977778 | -40.0977778 |
| MZUSP 95613 | North | Sooretama - ES | -19.1977778 | -40.0977778 |
| MZUSP 95614 | North | Sooretama - ES | -19.1977778 | -40.0977778 |
| MZUSP 95615 | North | Sooretama - ES | -19.1977778 | -40.0977778 |
| MZUSP 95616 | North | Sooretama - ES | -19.1977778 | -40.0977778 |
| MZUSP 95617 | North | Sooretama - ES | -19.1977778 | -40.0977778 |
| MZUSP 95618 | North | Sooretama - ES | -19.1977778 | -40.0977778 |
| MZUSP 95619 | North | Sooretama - ES | -19.1977778 | -40.0977778 |
| MZUSP 95620 | North | Sooretama - ES | -19.1977778 | -40.0977778 |
| MZUSP 118010 | North | Sooretama - ES | -19.1977778 | -40.0977778 |
| MZUSP 95739 | North | Sooretama - ES | -19.1977778 | -40.0977778 |
| MZUSP 9726 | South | Angra dos Reis - RJ | -23.0066667 | -44.3180556 |
| MZUSP 9727 | South | Angra dos Reis - RJ | -23.0066667 | -44.3180556 |
| MZUSP 9723 | South | Angra dos Reis - RJ | -23.0066667 | -44.3180556 |
| MNRJ 37292 | South | Angra dos Reis - RJ | -23.0066667 | -44.3180556 |
| MZUSP 137920 | North | UHE de Fumaça, Diogo de Vasconcelos - MG | -20.4877778 | -43.1983333 |
| MZUSP 136235 | South | Bertioga, Boracéia - SP | -23.8544444 | -46.1386111 |
| MZUSP 136236 | South | Bertioga, Boracéia - SP | -23.8544444 | -46.1386111 |
| MZUSP 136237 | South | Bertioga, Boracéia - SP | -23.8544444 | -46.1386111 |
| MZUSP 136238 | South | Bertioga, Boracéia - SP | -23.8544444 | -46.1386111 |
| MZUSP 139059 | South | Bertioga, Boracéia - SP | -23.8544444 | -46.1386111 |
| MZUSP 139060 | South | Bertioga, Boracéia - SP | -23.8544444 | -46.1386111 |
| MZUSP 139061 | South | Bertioga, Boracéia - SP | -23.8544444 | -46.1386111 |
| MZUSP 64718 | South | Timbó - SC | -26.8233333 | -49.2716667 |
| MZUSP 84543 | South | Buri - SP | -23.7975 | -48.5927778 |
| MZUSP 84544 | South | Buri - SP | -23.7975 | -48.5927778 |
| MZUSP 84545 | South | Buri - SP | -23.7975 | -48.5927778 |
| MZUSP 84546 | South | Buri - SP | -23.7975 | -48.5927778 |
| MZUSP 134878 | South | Buri - SP | -23.7975 | -48.5927778 |
| MZUSP 134879 | South | Buri - SP | -23.7975 | -48.5927778 |
| MZUSP 131981 | South | Est. Ecológica do Bananal, Bananal - SP | -22.6836111 | -44.3233333 |
| MZUSP 131982 | South | Est. Ecológica do Bananal, Bananal - SP | -22.6836111 | -44.3233333 |
| MZUSP 131983 | South | Est. Ecológica do Bananal, Bananal - SP | -22.6836111 | -44.3233333 |
| MZUSP 131984 | South | Est. Ecológica do Bananal, Bananal - SP | -22.6836111 | -44.3233333 |
| MZUSP 131985 | South | Est. Ecológica do Bananal, Bananal - SP | -22.6836111 | -44.3233333 |
| MZUSP 93338 | South | Miracatu - SP | -24.2813889 | -47.4597222 |
| MZUSP 117612 | South | Miracatu - SP | -24.2813889 | -47.4597222 |
| MZUSP 117613 | South | Miracatu - SP | -24.2813889 | -47.4597222 |
| MZUSP 117614 | South | Miracatu - SP | -24.2813889 | -47.4597222 |
| MZUSP 117615 | South | Miracatu - SP | -24.2813889 | -47.4597222 |
| MZUSP 117616 | South | Miracatu - SP | -24.2813889 | -47.4597222 |
| MZUSP 117617 | South | Miracatu - SP | -24.2813889 | -47.4597222 |
| MZUSP 117618 | South | Miracatu - SP | -24.2813889 | -47.4597222 |
| MZUSP 117619 | South | Miracatu - SP | -24.2813889 | -47.4597222 |
| MZUSP 117620 | South | Miracatu - SP | -24.2813889 | -47.4597222 |
| MZUSP 117621 | South | Miracatu - SP | -24.2813889 | -47.4597222 |
| MZUSP 117622 | South | Miracatu - SP | -24.2813889 | -47.4597222 |
| MZUSP 117623 | South | Miracatu - SP | -24.2813889 | -47.4597222 |
| MZUSP 117624 | South | Miracatu - SP | -24.2813889 | -47.4597222 |
| MZUSP 117625 | South | Miracatu - SP | -24.2813889 | -47.4597222 |
| MZUSP 117626 | South | Miracatu - SP | -24.2813889 | -47.4597222 |
| MZUSP 117627 | South | Miracatu - SP | -24.2813889 | -47.4597222 |
| MZUSP 117628 | South | Miracatu - SP | -24.2813889 | -47.4597222 |
| MZUSP 117629 | South | Miracatu - SP | -24.2813889 | -47.4597222 |
| MZUSP 117630 | South | Miracatu - SP | -24.2813889 | -47.4597222 |
| MZUSP 117631 | South | Miracatu - SP | -24.2813889 | -47.4597222 |
| MZUSP 117632 | South | Miracatu - SP | -24.2813889 | -47.4597222 |
| MZUSP 117633 | South | Miracatu - SP | -24.2813889 | -47.4597222 |
| MZUSP 117634 | South | Miracatu - SP | -24.2813889 | -47.4597222 |
| MZUSP 117635 | South | Miracatu - SP | -24.2813889 | -47.4597222 |
| MZUSP 117636 | South | Miracatu - SP | -24.2813889 | -47.4597222 |
| MZUSP 117637 | South | Miracatu - SP | -24.2813889 | -47.4597222 |
| MZUSP 117638 | South | Miracatu - SP | -24.2813889 | -47.4597222 |
| MZUSP 117639 | South | Miracatu - SP | -24.2813889 | -47.4597222 |
| MZUSP 117640 | South | Miracatu - SP | -24.2813889 | -47.4597222 |
| MZUSP 77074 | South | Pariquer-açu - SP | -24.715 | -47.8811111 |
| MZUSP 77075 | South | Pariquer-açu - SP | -24.715 | -47.8811111 |
| MZUSP 77076 | South | Pariquer-açu - SP | -24.715 | -47.8811111 |
| MZUSP 77077 | South | Pariquer-açu - SP | -24.715 | -47.8811111 |
| MZUSP 77078 | South | Pariquer-açu - SP | -24.715 | -47.8811111 |
| MZUSP 9646 | South | Itanhaém - SP | -24.1830556 | -46.7888889 |
| MZUSP 9647 | South | Itanhaém - SP | -24.1830556 | -46.7888889 |
| MZUSP 136707 | South | Moji das Cruzes - SP | -23.5227778 | -46.1883333 |
| MZUSP 136708 | South | Moji das Cruzes - SP | -23.5227778 | -46.1883333 |
| MZUSP 136709 | South | Moji das Cruzes - SP | -23.5227778 | -46.1883333 |
| MZUSP 125385 | South | Tapiraí - SP | -23.9636111 | -47.5072222 |
| MZUSP 125386 | South | Tapiraí - SP | -23.9636111 | -47.5072222 |
| MZUSP 125387 | South | Tapiraí - SP | -23.9636111 | -47.5072222 |
| MZUSP 125388 | South | Tapiraí - SP | -23.9636111 | -47.5072222 |
| MZUSP 125389 | South | Tapiraí - SP | -23.9636111 | -47.5072222 |
| MZUSP 125390 | South | Tapiraí - SP | -23.9636111 | -47.5072222 |
| MZUSP 125391 | South | Tapiraí - SP | -23.9636111 | -47.5072222 |
| MZUSP 125392 | South | Tapiraí - SP | -23.9636111 | -47.5072222 |
| MZUSP 51656 | South | Iporanga - SP | -24.5855556 | -48.5930556 |
| MZUSP 51657 | South | Iporanga - SP | -24.5855556 | -48.5930556 |
| MZUSP 51658 | South | Iporanga - SP | -24.5855556 | -48.5930556 |
| MZUSP 51659 | South | Iporanga - SP | -24.5855556 | -48.5930556 |
| MZUSP 31134 | South | Iporanga - SP | -24.5855556 | -48.5930556 |
| MZUSP 126242 | South | PETAR - SP | -24.5094444 | -48.8425 |
| MZUSP 126243 | South | PETAR - SP | -24.5094444 | -48.8425 |
| MZUSP 126244 | South | PETAR - SP | -24.5094444 | -48.8425 |
| MZUSP 126245 | South | PETAR - SP | -24.5094444 | -48.8425 |
| MZUSP 126246 | South | PETAR - SP | -24.5094444 | -48.8425 |
| MZUSP 126247 | South | PETAR - SP | -24.5094444 | -48.8425 |
| MZUSP 121668 | North | Faz. 2 irmãos, Recife - PE | -8.0538889 | -34.8811111 |
| MZUSP 121669 | North | Faz. 2 irmãos, Recife - PE | -8.0538889 | -34.8811111 |
| MZUSP 121670 | North | Faz. 2 irmãos, Recife - PE | -8.0538889 | -34.8811111 |
| MZUSP 121671 | North | Faz. 2 irmãos, Recife - PE | -8.0538889 | -34.8811111 |
| MZUSP 117839 | North | Ilhéus - BA | -14.7888889 | -39.0494444 |
| MZUSP 118613 | North | Ilhéus - BA | -14.7888889 | -39.0494444 |
| MZUSP 118614 | North | Ilhéus - BA | -14.7888889 | -39.0494444 |
| MZUSP 118615 | North | Ilhéus - BA | -14.7888889 | -39.0494444 |
| MZUSP 118616 | North | Ilhéus - BA | -14.7888889 | -39.0494444 |
| MZUSP 118617 | North | Ilhéus - BA | -14.7888889 | -39.0494444 |
| MZUSP 118618 | North | Ilhéus - BA | -14.7888889 | -39.0494444 |
| MZUSP 118619 | North | Ilhéus - BA | -14.7888889 | -39.0494444 |
| MZUSP 118620 | North | Ilhéus - BA | -14.7888889 | -39.0494444 |
| MZUSP 118621 | North | Ilhéus - BA | -14.7888889 | -39.0494444 |
| MZUSP 118622 | North | Ilhéus - BA | -14.7888889 | -39.0494444 |
| MZUSP 118623 | North | Ilhéus - BA | -14.7888889 | -39.0494444 |
| MZUSP 118624 | North | Ilhéus - BA | -14.7888889 | -39.0494444 |
| MZUSP 118625 | North | Ilhéus - BA | -14.7888889 | -39.0494444 |
| MZUSP 118626 | North | Ilhéus - BA | -14.7888889 | -39.0494444 |
| MZUSP 118627 | North | Ilhéus - BA | -14.7888889 | -39.0494444 |
| MZUSP 118628 | North | Ilhéus - BA | -14.7888889 | -39.0494444 |
| MZUSP 118629 | North | Ilhéus - BA | -14.7888889 | -39.0494444 |
| MNRJ 51636 | North | Ilhéus - BA | -14.7888889 | -39.0494444 |
| UESC 6911 | North | Ilhéus - BA | -14.7888889 | -39.0494444 |
| UESC 6910 | North | Ilhéus - BA | -14.7888889 | -39.0494444 |
| UESC 7209 | North | Ilhéus - BA | -14.7888889 | -39.0494444 |
| UESC 7314 | North | Ilhéus - BA | -14.7888889 | -39.0494444 |
| UESC 7494 | North | Ilhéus - BA | -14.7888889 | -39.0494444 |
| UESC 7495 | North | Ilhéus - BA | -14.7888889 | -39.0494444 |
| UESC 7496 | North | Ilhéus - BA | -14.7888889 | -39.0494444 |
| MZUSP 106707 | North | Itapetinga - BA | -15.2488889 | -40.2477778 |
| MZUSP 117967 | South | Barra de São João - RJ | -22.5894444 | -41.9927778 |
| MZUSP 117968 | South | Barra de São João - RJ | -22.5894444 | -41.9927778 |
| MZUSP 117969 | South | Barra de São João - RJ | -22.5894444 | -41.9927778 |
| MZUSP 117970 | South | Barra de São João - RJ | -22.5894444 | -41.9927778 |
| MZUSP 117971 | South | Barra de São João - RJ | -22.5894444 | -41.9927778 |
| MZUSP 117972 | South | Barra de São João - RJ | -22.5894444 | -41.9927778 |
| MZUSP 117973 | South | Barra de São João - RJ | -22.5894444 | -41.9927778 |
| MZUSP 117974 | South | Barra de São João - RJ | -22.5894444 | -41.9927778 |
| MZUSP 117975 | South | Barra de São João - RJ | -22.5894444 | -41.9927778 |
| MZUSP 117976 | South | Barra de São João - RJ | -22.5894444 | -41.9927778 |
| MZUSP 117977 | South | Barra de São João - RJ | -22.5894444 | -41.9927778 |
| MZUSP 117978 | South | Barra de São João - RJ | -22.5894444 | -41.9927778 |
| MZUSP 117979 | South | Barra de São João - RJ | -22.5894444 | -41.9927778 |
| MZUSP 117980 | South | Barra de São João - RJ | -22.5894444 | -41.9927778 |
| MZUSP 117981 | South | Barra de São João - RJ | -22.5894444 | -41.9927778 |
| MZUSP 117982 | South | Barra de São João - RJ | -22.5894444 | -41.9927778 |
| MZUSP 117983 | South | Barra de São João - RJ | -22.5894444 | -41.9927778 |
| MZUSP 117984 | South | Barra de São João - RJ | -22.5894444 | -41.9927778 |
| MZUSP 117985 | South | Barra de São João - RJ | -22.5894444 | -41.9927778 |
| MZUSP 117986 | South | Barra de São João - RJ | -22.5894444 | -41.9927778 |
| MZUSP 117987 | South | Barra de São João - RJ | -22.5894444 | -41.9927778 |
| MZUSP 117988 | South | Barra de São João - RJ | -22.5894444 | -41.9927778 |
| MZUSP 117989 | South | Barra de São João - RJ | -22.5894444 | -41.9927778 |
| MZUSP 117990 | South | Barra de São João - RJ | -22.5894444 | -41.9927778 |
| MZUSP 117991 | South | Barra de São João - RJ | -22.5894444 | -41.9927778 |
| MZUSP 117992 | South | Barra de São João - RJ | -22.5894444 | -41.9927778 |
| MZUSP 117993 | South | Barra de São João - RJ | -22.5894444 | -41.9927778 |
| MZUSP 117994 | South | Barra de São João - RJ | -22.5894444 | -41.9927778 |
| MZUSP 117995 | South | Barra de São João - RJ | -22.5894444 | -41.9927778 |
| MZUSP 117996 | South | Barra de São João - RJ | -22.5894444 | -41.9927778 |
| MZUSP 117997 | South | Barra de São João - RJ | -22.5894444 | -41.9927778 |
| MZUSP 117998 | South | Barra de São João - RJ | -22.5894444 | -41.9927778 |
| MZUSP 117999 | South | Barra de São João - RJ | -22.5894444 | -41.9927778 |
| MZUSP 118000 | South | Barra de São João - RJ | -22.5894444 | -41.9927778 |
| MZUSP 118001 | South | Barra de São João - RJ | -22.5894444 | -41.9927778 |
| MZUSP 118002 | South | Barra de São João - RJ | -22.5894444 | -41.9927778 |
| MZUSP 118003 | South | Barra de São João - RJ | -22.5894444 | -41.9927778 |
| MZUSP 118004 | South | Barra de São João - RJ | -22.5894444 | -41.9927778 |
| MZUSP 118005 | South | Barra de São João - RJ | -22.5894444 | -41.9927778 |
| MZUSP 118006 | South | Barra de São João - RJ | -22.5894444 | -41.9927778 |
| MZUSP 118007 | South | Barra de São João - RJ | -22.5894444 | -41.9927778 |
| MZUSP 76917 | South | Barra de São João - RJ | -22.5894444 | -41.9927778 |
| MZUSP 76918 | South | Barra de São João - RJ | -22.5894444 | -41.9927778 |
| MZUSP 76919 | South | Barra de São João - RJ | -22.5894444 | -41.9927778 |
| MZUSP 118008 | South | Seropédica - RJ | -22.7438889 | -43.7075 |
| MZUSP 118009 | South | Seropédica - RJ | -22.7438889 | -43.7075 |
| MZUSP 118017 | South | Seropédica - RJ | -22.7438889 | -43.7075 |
| MZUSP 117532 | North | Teófilo Otoni - MG | -17.8575 | -41.5052778 |
| MZUSP 117533 | North | Teófilo Otoni - MG | -17.8575 | -41.5052778 |
| MZUSP 117534 | North | Teófilo Otoni - MG | -17.8575 | -41.5052778 |
| MZUSP 117535 | North | Teófilo Otoni - MG | -17.8575 | -41.5052778 |
| MZUSP 117536 | North | Teófilo Otoni - MG | -17.8575 | -41.5052778 |
| MZUSP 117537 | North | Teófilo Otoni - MG | -17.8575 | -41.5052778 |
| MZUSP 106795 | North | Pedra Azul - MG | -16.0052778 | -41.2972222 |
| MZUSP 117964 | North | Peçanha - MG | -18.5486111 | -42.5569444 |
| MZUSP 118023 | Contact Zone | Barro Branco, Italva - RJ | -21.4208333 | -41.6908333 |
| MZUSP 118022 | Contact Zone | Parna Itatiaia - RJ | -22.4961111 | -44.5633333 |
| MNRJ 50831 | South | Pq. Nacional Taquara, Duque de Caxias - RJ | -22.7855556 | -43.3116667 |
| MNRJ 50832 | South | Pq. Nacional Taquara, Duque de Caxias - RJ | -22.7855556 | -43.3116667 |
| MNRJ 50842 | South | Pq. Nacional Taquara, Duque de Caxias - RJ | -22.7855556 | -43.3116667 |
| MNRJ 54140 | South | Pq. Nacional Taquara, Duque de Caxias - RJ | -22.7855556 | -43.3116667 |
| MNRJ 54141 | South | Pq. Nacional Taquara, Duque de Caxias - RJ | -22.7855556 | -43.3116667 |
| MNRJ 54142 | South | Pq. Nacional Taquara, Duque de Caxias - RJ | -22.7855556 | -43.3116667 |
| MNRJ 47488 | South | Pq. Nacional Taquara, Duque de Caxias - RJ | -22.7855556 | -43.3116667 |
| UFBA 8426 | South | Pq. Nacional Taquara, Duque de Caxias - RJ | -22.7855556 | -43.3116667 |
| UFBA 8427 | South | Pq. Nacional Taquara, Duque de Caxias - RJ | -22.7855556 | -43.3116667 |
| UFBA 8428 | South | Pq. Nacional Taquara, Duque de Caxias - RJ | -22.7855556 | -43.3116667 |
| UFBA 8429 | South | Pq. Nacional Taquara, Duque de Caxias - RJ | -22.7855556 | -43.3116667 |
| UFBA 8430 | South | Pq. Nacional Taquara, Duque de Caxias - RJ | -22.7855556 | -43.3116667 |
| UFBA 8431 | South | Pq. Nacional Taquara, Duque de Caxias - RJ | -22.7855556 | -43.3116667 |
| UFBA 8432 | South | Pq. Nacional Taquara, Duque de Caxias - RJ | -22.7855556 | -43.3116667 |
| UFBA 8433 | South | Pq. Nacional Taquara, Duque de Caxias - RJ | -22.7855556 | -43.3116667 |
| UFBA 8434 | South | Pq. Nacional Taquara, Duque de Caxias - RJ | -22.7855556 | -43.3116667 |
| UFBA 8435 | South | Pq. Nacional Taquara, Duque de Caxias - RJ | -22.7855556 | -43.3116667 |
| UFBA 8436 | South | Pq. Nacional Taquara, Duque de Caxias - RJ | -22.7855556 | -43.3116667 |
| UFBA 8437 | South | Pq. Nacional Taquara, Duque de Caxias - RJ | -22.7855556 | -43.3116667 |
| UFBA 8438 | South | Pq. Nacional Taquara, Duque de Caxias - RJ | -22.7855556 | -43.3116667 |
| UFBA 8439 | South | Pq. Nacional Taquara, Duque de Caxias - RJ | -22.7855556 | -43.3116667 |
| UFBA 8440 | South | Pq. Nacional Taquara, Duque de Caxias - RJ | -22.7855556 | -43.3116667 |
| UFBA 8441 | South | Pq. Nacional Taquara, Duque de Caxias - RJ | -22.7855556 | -43.3116667 |
| UFBA 8442 | South | Pq. Nacional Taquara, Duque de Caxias - RJ | -22.7855556 | -43.3116667 |
| UFBA 8443 | South | Pq. Nacional Taquara, Duque de Caxias - RJ | -22.7855556 | -43.3116667 |
| UFBA 8444 | South | Pq. Nacional Taquara, Duque de Caxias - RJ | -22.7855556 | -43.3116667 |
| UFBA 8445 | South | Pq. Nacional Taquara, Duque de Caxias - RJ | -22.7855556 | -43.3116667 |
| MNRJ 53972 | South | Pq. Nacional Restinga de Jurubatiba, Quissamã - RJ | -22.1066667 | -41.4722222 |
| MNRJ 53973 | South | Pq. Nacional Restinga de Jurubatiba, Quissamã - RJ | -22.1066667 | -41.4722222 |
| MNRJ 53270 | South | Campos dos Goytacazes - RJ | -21.7541667 | -41.3244444 |
| MNRJ 53279 | South | Campos dos Goytacazes - RJ | -21.7541667 | -41.3244444 |
| MNRJ 53280 | South | Campos dos Goytacazes - RJ | -21.7541667 | -41.3244444 |
| MNRJ 53271 | South | Campos dos Goytacazes - RJ | -21.7541667 | -41.3244444 |
| MNRJ 53272 | South | Campos dos Goytacazes - RJ | -21.7541667 | -41.3244444 |
| MNRJ 53273 | South | Campos dos Goytacazes - RJ | -21.7541667 | -41.3244444 |
| MNRJ 53274 | South | Campos dos Goytacazes - RJ | -21.7541667 | -41.3244444 |
| MNRJ 53275 | South | Campos dos Goytacazes - RJ | -21.7541667 | -41.3244444 |
| MNRJ 53276 | South | Campos dos Goytacazes - RJ | -21.7541667 | -41.3244444 |
| MNRJ 53277 | South | Campos dos Goytacazes - RJ | -21.7541667 | -41.3244444 |
| MNRJ 53278 | South | Campos dos Goytacazes - RJ | -21.7541667 | -41.3244444 |
| MNRJ 55091 | North | Serra da Caraça, Catas Altas - MG | -20.0747222 | -43.4075 |
| MNRJ 55022 | North | Serra da Caraça, Catas Altas - MG | -20.0747222 | -43.4075 |
| MNRJ 55023 | North | Serra da Caraça, Catas Altas - MG | -20.0747222 | -43.4075 |
| MNRJ 55024 | North | Serra da Caraça, Catas Altas - MG | -20.0747222 | -43.4075 |
| MNRJ 55025 | North | Serra da Caraça, Catas Altas - MG | -20.0747222 | -43.4075 |
| MNRJ 55026 | North | Serra da Caraça, Catas Altas - MG | -20.0747222 | -43.4075 |
| MNRJ 55027 | North | Serra da Caraça, Catas Altas - MG | -20.0747222 | -43.4075 |
| MNRJ 55028 | North | Serra da Caraça, Catas Altas - MG | -20.0747222 | -43.4075 |
| MNRJ 55029 | North | Serra da Caraça, Catas Altas - MG | -20.0747222 | -43.4075 |
| MNRJ 54844 | South | Citrolândia, Magé - RJ | -22.6527778 | -43.0405556 |
| MNRJ 24828 | South | Citrolândia, Magé - RJ | -22.6527778 | -43.0405556 |
| MNRJ 24829 | South | Citrolândia, Magé - RJ | -22.6527778 | -43.0405556 |
| MNRJ 24830 | South | Citrolândia, Magé - RJ | -22.6527778 | -43.0405556 |
| MNRJ 24831 | South | Citrolândia, Magé - RJ | -22.6527778 | -43.0405556 |
| MNRJ 24832 | South | Citrolândia, Magé - RJ | -22.6527778 | -43.0405556 |
| MNRJ 15602 | South | Citrolândia, Magé - RJ | -22.6527778 | -43.0405556 |
| MNRJ 32860 | South | Faz. Santa Mônica, Guarapari - RJ | -22.9027778 | -43.2075 |
| MNRJ 53235 | Contact Zone | Itaperuna - RJ | -21.205 | -41.8877778 |
| MNRJ 53236 | Contact Zone | Itaperuna - RJ | -21.205 | -41.8877778 |
| MNRJ 53237 | Contact Zone | Itaperuna - RJ | -21.205 | -41.8877778 |
| MNRJ 53238 | Contact Zone | Itaperuna - RJ | -21.205 | -41.8877778 |
| MNRJ 53239 | Contact Zone | Itaperuna - RJ | -21.205 | -41.8877778 |
| MNRJ 53240 | Contact Zone | Itaperuna - RJ | -21.205 | -41.8877778 |
| MNRJ 53241 | Contact Zone | Itaperuna - RJ | -21.205 | -41.8877778 |
| MNRJ 53283 | Contact Zone | Itaperuna - RJ | -21.205 | -41.8877778 |
| MNRJ 53284 | Contact Zone | Itaperuna - RJ | -21.205 | -41.8877778 |
| MNRJ 53285 | Contact Zone | Itaperuna - RJ | -21.205 | -41.8877778 |
| MNRJ 55713 | South | Iguaba Grande - RJ | -22.8391667 | -42.2288889 |
| MNRJ 31305 | Contact Zone | Baixo Guandu - ES | -19.5188889 | -41.0158333 |
| MNRJ 51967 | Contact Zone | Muniz Freire - ES | -20.4641667 | -41.4130556 |
| MNRJ 51968 | Contact Zone | Muniz Freire - ES | -20.4641667 | -41.4130556 |
| MNRJ 51969 | Contact Zone | Muniz Freire - ES | -20.4641667 | -41.4130556 |
| MNRJ 43307 | Contact Zone | Abre Campo - MG | -20.3011111 | -42.4775 |
| MNRJ 55463 | North | Antônio Dias - MG | -19.6527778 | -42.8722222 |
| MNRJ 27495 | Contact Zone | São José Delmiro Braga - MG | -21.9486111 | -43.415 |
| MNRJ 53286 | Contact Zone | São Franscisco Itabapoana - RJ | -21.3019444 | -40.9613889 |
| MNRJ 50971 | Contact Zone | Divisa entre Campos dos Goytacazes - RJ e Mimoso do Sul - ES | -21.2038889 | -41.4597222 |
| MNRJ 50972 | Contact Zone | Divisa entre Campos dos Goytacazes - RJ e Mimoso do Sul - ES | -21.2038889 | -41.4597222 |
| MNRJ 53262 | Contact Zone | Divisa entre Campos dos Goytacazes - RJ e Mimoso do Sul - ES | -21.2038889 | -41.4597222 |
| MNRJ 53263 | South | Santa Maria Madalena - RJ | -21.9552778 | -42.0080556 |
| MNRJ 53264 | South | Santa Maria Madalena - RJ | -21.9552778 | -42.0080556 |
| MNRJ 53265 | South | Santa Maria Madalena - RJ | -21.9552778 | -42.0080556 |
| MNRJ 53266 | South | Santa Maria Madalena - RJ | -21.9552778 | -42.0080556 |
| MNRJ 53267 | South | Santa Maria Madalena - RJ | -21.9552778 | -42.0080556 |
| MNRJ 53268 | South | Santa Maria Madalena - RJ | -21.9552778 | -42.0080556 |
| MNRJ 53269 | South | Santa Maria Madalena - RJ | -21.9552778 | -42.0080556 |
| MNRJ 31355 | South | Santa Maria Madalena - RJ | -21.9552778 | -42.0080556 |
| MNRJ 18014 | North | Mamanguape - PB | -6.8386111 | -35.1261111 |
| MNRJ 18015 | North | Mamanguape - PB | -6.8386111 | -35.1261111 |
| MNRJ 18016 | North | Mamanguape - PB | -6.8386111 | -35.1261111 |
| MNRJ 18017 | North | Mamanguape - PB | -6.8386111 | -35.1261111 |
| MNRJ 51235 | South | Tanguá - RJ | -22.7302778 | -42.7141667 |
| MNRJ 51236 | South | Tanguá - RJ | -22.7302778 | -42.7141667 |
| MNRJ 51237 | South | Tanguá - RJ | -22.7302778 | -42.7141667 |
| MNRJ 51238 | South | Tanguá - RJ | -22.7302778 | -42.7141667 |
| MNRJ 51239 | South | Tanguá - RJ | -22.7302778 | -42.7141667 |
| MNRJ 51240 | South | Tanguá - RJ | -22.7302778 | -42.7141667 |
| MNRJ 51272 | South | Tanguá - RJ | -22.7302778 | -42.7141667 |
| MNRJ 43484 | South | Tanguá - RJ | -22.7302778 | -42.7141667 |
| MNRJ 35995 | South | Tanguá - RJ | -22.7302778 | -42.7141667 |
| MNRJ 21391 | North | Barão dos Cocais - MG | -19.9372222 | -43.4872222 |
| MNRJ 21392 | North | Barão dos Cocais - MG | -19.9372222 | -43.4872222 |
| MNRJ 40185 | Contact Zone | Aracruz - ES | -19.8202778 | -40.2733333 |
| MNRJ 40186 | Contact Zone | Aracruz - ES | -19.8202778 | -40.2733333 |
| MNRJ 26876 | South | Guapimirim - RJ | -22.5372222 | -42.9819444 |
| MNRJ 34533 | South | Barra Mansa - RJ | -22.5441667 | -44.1713889 |
| MNRJ 34534 | South | Barra Mansa - RJ | -22.5441667 | -44.1713889 |
| MNRJ 34535 | South | Barra Mansa - RJ | -22.5441667 | -44.1713889 |
| MNRJ 34536 | South | Barra Mansa - RJ | -22.5441667 | -44.1713889 |
| MNRJ 18414 | North | São Mateus - ES | -18.7161111 | -39.8588889 |
| MNRJ 18415 | North | São Mateus - ES | -18.7161111 | -39.8588889 |
| MNRJ 18416 | North | São Mateus - ES | -18.7161111 | -39.8588889 |
| MNRJ 15646 | North | Pq. Florestal Estadual do Rio Doce, Marliéria - MG | -19.8427778 | -42.7766667 |
| MNRJ 15647 | North | Pq. Florestal Estadual do Rio Doce, Marliéria - MG | -19.8427778 | -42.7766667 |
| MNRJ 15648 | North | Pq. Florestal Estadual do Rio Doce, Marliéria - MG | -19.8427778 | -42.7766667 |
| MNRJ 15649 | North | Pq. Florestal Estadual do Rio Doce, Marliéria - MG | -19.8427778 | -42.7766667 |
| MNRJ 15650 | North | Pq. Florestal Estadual do Rio Doce, Marliéria - MG | -19.8427778 | -42.7766667 |
| MNRJ 15651 | North | Pq. Florestal Estadual do Rio Doce, Marliéria - MG | -19.8427778 | -42.7766667 |
| MNRJ 15652 | North | Pq. Florestal Estadual do Rio Doce, Marliéria - MG | -19.8427778 | -42.7766667 |
| MNRJ 15653 | North | Pq. Florestal Estadual do Rio Doce, Marliéria - MG | -19.8427778 | -42.7766667 |
| MNRJ 15654 | North | Pq. Florestal Estadual do Rio Doce, Marliéria - MG | -19.8427778 | -42.7766667 |
| MNRJ 15655 | North | Pq. Florestal Estadual do Rio Doce, Marliéria - MG | -19.8427778 | -42.7766667 |
| MZUFV 325 | North | Pq. Florestal Estadual do Rio Doce, Marliéria - MG | -19.8427778 | -42.7766667 |
| MZUFV 326 | North | Pq. Florestal Estadual do Rio Doce, Marliéria - MG | -19.8427778 | -42.7766667 |
| MZUFV 327 | North | Pq. Florestal Estadual do Rio Doce, Marliéria - MG | -19.8427778 | -42.7766667 |
| MZUFV 328 | North | Pq. Florestal Estadual do Rio Doce, Marliéria - MG | -19.8427778 | -42.7766667 |
| MZUFV 329 | North | Pq. Florestal Estadual do Rio Doce, Marliéria - MG | -19.8427778 | -42.7766667 |
| MZUFV 330 | North | Pq. Florestal Estadual do Rio Doce, Marliéria - MG | -19.8427778 | -42.7766667 |
| MZUFV 331 | North | Pq. Florestal Estadual do Rio Doce, Marliéria - MG | -19.8427778 | -42.7766667 |
| MZUFV 332 | North | Pq. Florestal Estadual do Rio Doce, Marliéria - MG | -19.8427778 | -42.7766667 |
| MZUFV 678 | North | Pq. Florestal Estadual do Rio Doce, Marliéria - MG | -19.8427778 | -42.7766667 |
| MZUFV 768 | North | Pq. Florestal Estadual do Rio Doce, Marliéria - MG | -19.8427778 | -42.7766667 |
| MZUFV 769 | North | Pq. Florestal Estadual do Rio Doce, Marliéria - MG | -19.8427778 | -42.7766667 |
| MZUFV 770 | North | Pq. Florestal Estadual do Rio Doce, Marliéria - MG | -19.8427778 | -42.7766667 |
| MZUFV 771 | North | Pq. Florestal Estadual do Rio Doce, Marliéria - MG | -19.8427778 | -42.7766667 |
| MZUFV 772 | North | Pq. Florestal Estadual do Rio Doce, Marliéria - MG | -19.8427778 | -42.7766667 |
| MZUFV 773 | North | Pq. Florestal Estadual do Rio Doce, Marliéria - MG | -19.8427778 | -42.7766667 |
| MNRJ 49307 | South | Est. Ecol. de Guapiaçu, cachoeira do macuco - RJ | -22.4291667 | -42.7505556 |
| MNRJ 40445 | South | Est. Ecol. de Guapiaçu, cachoeira do macuco - RJ | -22.4291667 | -42.7505556 |
| MNRJ 40446 | South | Est. Ecol. de Guapiaçu, cachoeira do macuco - RJ | -22.4291667 | -42.7505556 |
| MNRJ 21677 | South | Engenheiro Paulo de Frontin - RJ | -22.5497222 | -43.6783333 |
| MNRJ 21678 | South | Engenheiro Paulo de Frontin - RJ | -22.5497222 | -43.6783333 |
| MNRJ 21679 | South | Engenheiro Paulo de Frontin - RJ | -22.5497222 | -43.6783333 |
| MNRJ 36053 | North | São Gonçalo do Rio Abaixo - MG | -19.8261111 | -43.3622222 |
| MNRJ 34139 | North | São Gonçalo do Rio Abaixo - MG | -19.8261111 | -43.3622222 |
| MNRJ 34140 | North | São Gonçalo do Rio Abaixo - MG | -19.8261111 | -43.3622222 |
| MNRJ 36461 | North | São Gonçalo do Rio Abaixo - MG | -19.8261111 | -43.3622222 |
| MNRJ 36351 | North | São Gonçalo do Rio Abaixo - MG | -19.8261111 | -43.3622222 |
| MNRJ 36352 | North | São Gonçalo do Rio Abaixo - MG | -19.8261111 | -43.3622222 |
| MNRJ 21426 | North | São Gonçalo do Rio Abaixo - MG | -19.8261111 | -43.3622222 |
| MNRJ 21427 | North | São Gonçalo do Rio Abaixo - MG | -19.8261111 | -43.3622222 |
| MNRJ 21428 | North | São Gonçalo do Rio Abaixo - MG | -19.8261111 | -43.3622222 |
| MNRJ 21429 | North | São Gonçalo do Rio Abaixo - MG | -19.8261111 | -43.3622222 |
| MNRJ 31437 | North | São Gonçalo do Rio Abaixo - MG | -19.8261111 | -43.3622222 |
| MNRJ 31438 | North | São Gonçalo do Rio Abaixo - MG | -19.8261111 | -43.3622222 |
| MNRJ 31439 | North | São Gonçalo do Rio Abaixo - MG | -19.8261111 | -43.3622222 |
| MNRJ 31440 | North | São Gonçalo do Rio Abaixo - MG | -19.8261111 | -43.3622222 |
| MNRJ 31441 | North | São Gonçalo do Rio Abaixo - MG | -19.8261111 | -43.3622222 |
| MNRJ 31442 | North | São Gonçalo do Rio Abaixo - MG | -19.8261111 | -43.3622222 |
| MNRJ 31443 | North | São Gonçalo do Rio Abaixo - MG | -19.8261111 | -43.3622222 |
| MNRJ 31444 | North | São Gonçalo do Rio Abaixo - MG | -19.8261111 | -43.3622222 |
| MNRJ 31445 | North | São Gonçalo do Rio Abaixo - MG | -19.8261111 | -43.3622222 |
| MNRJ 43428 | South | Mangaratiba - RJ | -22.9597222 | -44.0405556 |
| MNRJ 31637 | Contact Zone | Rio Novo - MG | -21.4575 | -43.1252778 |
| MNRJ 31638 | Contact Zone | Rio Novo - MG | -21.4575 | -43.1252778 |
| MNRJ 41737 | North | Ouro Preto - MG | -20.2875 | -43.5080556 |
| MNRJ 32193 | Contact Zone | São João Nepomuceno - MG | -21.54 | -43.0105556 |
| MNRJ 32194 | Contact Zone | São João Nepomuceno - MG | -21.54 | -43.0105556 |
| MNRJ 30688 | South | Jardim Botânico, Niterói - RJ | -22.8833333 | -43.1036111 |
| MNRJ 30689 | South | Jardim Botânico, Niterói - RJ | -22.8833333 | -43.1036111 |
| MNRJ 30690 | South | Jardim Botânico, Niterói - RJ | -22.8833333 | -43.1036111 |
| MNRJ 28926 | North | Serra do Teimoso, Jussari - BA | -15.1913889 | -39.4952778 |
| MNRJ 54619 | South | Resende - RJ | -22.4688889 | -44.4466667 |
| MNRJ 54620 | South | Resende - RJ | -22.4688889 | -44.4466667 |
| MNRJ 54621 | South | Resende - RJ | -22.4688889 | -44.4466667 |
| MNRJ 54622 | South | Resende - RJ | -22.4688889 | -44.4466667 |
| MNRJ 50241 | South | Silva Jardim - RJ | -22.6508333 | -42.3916667 |
| MNRJ 30317 | South | Saquarema - RJ | -22.92 | -42.5102778 |
| MNRJ 30318 | South | Saquarema - RJ | -22.92 | -42.5102778 |
| MNRJ 30319 | South | Saquarema - RJ | -22.92 | -42.5102778 |
| MNRJ 37203 | Contact Zone | Chiador - MG | -22.0025 | -43.0577778 |
| MNRJ 37204 | Contact Zone | Chiador - MG | -22.0025 | -43.0577778 |
| MNRJ 37205 | Contact Zone | Chiador - MG | -22.0025 | -43.0577778 |
| MZUFV 379 | North | Mariana - MG | -20.3777778 | -43.4161111 |
| MZUFV 381 | North | Mariana - MG | -20.3777778 | -43.4161111 |
| MZUFV 562 | North | Mariana - MG | -20.3777778 | -43.4161111 |
| MZUFV 563 | North | Mariana - MG | -20.3777778 | -43.4161111 |
| MZUFV 564 | North | Mariana - MG | -20.3777778 | -43.4161111 |
| MZUFV 566 | North | Mariana - MG | -20.3777778 | -43.4161111 |
| MZUFV 567 | North | Mariana - MG | -20.3777778 | -43.4161111 |
| MZUFV 584 | North | Mariana - MG | -20.3777778 | -43.4161111 |
| MZUFV 863 | North | Mariana - MG | -20.3777778 | -43.4161111 |
| MZUFV 864 | North | Mariana - MG | -20.3777778 | -43.4161111 |
| MZUFV 865 | North | Mariana - MG | -20.3777778 | -43.4161111 |
| MZUFV 866 | North | Mariana - MG | -20.3777778 | -43.4161111 |
| MZUFV 913 | North | Mariana - MG | -20.3777778 | -43.4161111 |
| MZUFV 914 | North | Mariana - MG | -20.3777778 | -43.4161111 |
| MZUFV 915 | North | Mariana - MG | -20.3777778 | -43.4161111 |
| MZUFV 916 | North | Mariana - MG | -20.3777778 | -43.4161111 |
| MZUFV 917 | North | Mariana - MG | -20.3777778 | -43.4161111 |
| MZUFV 1499 | North | Mariana - MG | -20.3777778 | -43.4161111 |
| MZUFV 1500 | North | Mariana - MG | -20.3777778 | -43.4161111 |
| MZUFV 1501 | North | Mariana - MG | -20.3777778 | -43.4161111 |
| MZUFV 1502 | North | Mariana - MG | -20.3777778 | -43.4161111 |
| MZUFV 1503 | North | Mariana - MG | -20.3777778 | -43.4161111 |
| MZUFV 1511 | North | Mariana - MG | -20.3777778 | -43.4161111 |
| MZUFV 1572 | North | Mariana - MG | -20.3777778 | -43.4161111 |
| MZUFV 1574 | North | Mariana - MG | -20.3777778 | -43.4161111 |
| MZUFV 1575 | North | Mariana - MG | -20.3777778 | -43.4161111 |
| MZUFV 2103 | North | Mariana - MG | -20.3777778 | -43.4161111 |
| MZUFV 2104 | North | Mariana - MG | -20.3777778 | -43.4161111 |
| MZUFV 2264 | North | Mariana - MG | -20.3777778 | -43.4161111 |
| MZUFV 2265 | North | Mariana - MG | -20.3777778 | -43.4161111 |
| MZUFV 2266 | North | Mariana - MG | -20.3777778 | -43.4161111 |
| MZUFV 2393 | North | Mariana - MG | -20.3777778 | -43.4161111 |
| MZUFV 2425 | North | Mariana - MG | -20.3777778 | -43.4161111 |
| MZUFV 2426 | North | Mariana - MG | -20.3777778 | -43.4161111 |
| MZUFV 2640 | North | Mariana - MG | -20.3777778 | -43.4161111 |
| MZUFV 3337 | North | Mariana - MG | -20.3777778 | -43.4161111 |
| MZUFV 3338 | North | Mariana - MG | -20.3777778 | -43.4161111 |
| MZUFV 3412 | North | Mariana - MG | -20.3777778 | -43.4161111 |
| MZUFV 3413 | North | Mariana - MG | -20.3777778 | -43.4161111 |
| MZUFV 3414 | North | Mariana - MG | -20.3777778 | -43.4161111 |
| MZUFV 3415 | North | Mariana - MG | -20.3777778 | -43.4161111 |
| MZUFV 3416 | North | Mariana - MG | -20.3777778 | -43.4161111 |
| MZUFV 3417 | North | Mariana - MG | -20.3777778 | -43.4161111 |
| MZUFV 3790 | North | Mariana - MG | -20.3777778 | -43.4161111 |
| MZUFV 3791 | North | Mariana - MG | -20.3777778 | -43.4161111 |
| MZUFV 3792 | North | Mariana - MG | -20.3777778 | -43.4161111 |
| MZUFV 2508 | Contact Zone | Viçosa - MG | -20.7538889 | -42.8819444 |
| MZUFV 4039 | Contact Zone | Viçosa - MG | -20.7538889 | -42.8819444 |
| MZUFV 5235 | Contact Zone | Viçosa - MG | -20.7538889 | -42.8819444 |
| MZUFV 5236 | Contact Zone | Viçosa - MG | -20.7538889 | -42.8819444 |
| MZUFV 5237 | Contact Zone | Viçosa - MG | -20.7538889 | -42.8819444 |
| MZUFV 5238 | Contact Zone | Viçosa - MG | -20.7538889 | -42.8819444 |
| MZUFV 5239 | Contact Zone | Viçosa - MG | -20.7538889 | -42.8819444 |
| MZUFV 5240 | Contact Zone | Viçosa - MG | -20.7538889 | -42.8819444 |
| MZUFV 5266 | Contact Zone | Viçosa - MG | -20.7538889 | -42.8819444 |
| MZUFV 5267 | Contact Zone | Viçosa - MG | -20.7538889 | -42.8819444 |
| MZUFV 5623 | Contact Zone | Viçosa - MG | -20.7538889 | -42.8819444 |
| MZUFV 5630 | Contact Zone | Viçosa - MG | -20.7538889 | -42.8819444 |
| CFBH 16338 | North | Campo Alegre - AL | -9.7819444 | -36.3508333 |
| CFBH 16339 | North | Campo Alegre - AL | -9.7819444 | -36.3508333 |
| CFBH 18605 | North | Campo Alegre - AL | -9.7819444 | -36.3508333 |
| CFBH 11065 | South | Antonina - PR | -25.4286111 | -48.7119444 |
| MHNCI 1416 | South | Antonina - PR | -25.4286111 | -48.7119444 |
| MHNCI 1417 | South | Antonina - PR | -25.4286111 | -48.7119444 |
| MHNCI 1418 | South | Antonina - PR | -25.4286111 | -48.7119444 |
| MHNCI 2545 | South | Antonina - PR | -25.4286111 | -48.7119444 |
| MHNCI 4794 | South | Antonina - PR | -25.4286111 | -48.7119444 |
| CHBEZ 146 | North | São Jozé da Lage - AL | -9.0097222 | -36.0583333 |
| CHBEZ 147 | North | São Jozé da Lage - AL | -9.0097222 | -36.0583333 |
| ZUFRJ 7320 | North | Quebrangulo - AL | -9.3188889 | -36.4711111 |
| ZUFRJ 7321 | North | Quebrangulo - AL | -9.3188889 | -36.4711111 |
| ZUFRJ 7322 | North | Quebrangulo - AL | -9.3188889 | -36.4711111 |
| ZUFRJ 7323 | North | Quebrangulo - AL | -9.3188889 | -36.4711111 |
| ZUFRJ 7324 | North | Quebrangulo - AL | -9.3188889 | -36.4711111 |
| ZUFRJ 7325 | North | Quebrangulo - AL | -9.3188889 | -36.4711111 |
| ZUFRJ 7570 | North | Quebrangulo - AL | -9.3188889 | -36.4711111 |
| ZUFRJ 7587 | North | Quebrangulo - AL | -9.3188889 | -36.4711111 |
| ZUFRJ 7588 | North | Quebrangulo - AL | -9.3188889 | -36.4711111 |
| ZUFRJ 7589 | North | Quebrangulo - AL | -9.3188889 | -36.4711111 |
| ZUFRJ 7590 | North | Quebrangulo - AL | -9.3188889 | -36.4711111 |

**Supplementary Table S2.** Morphometric measures for *Dendropsophus elegans* samples: SVL (snout-vent length), HL (head length), HW (head width), ED (eye diameter), END (eye nostril distance), TD (tympanum diameter), UEW (upper eyelid width), IOD (interorbital distance), IND (internarial distance), NSD (tip of snout nostril distance), HU (humerus length), RUL (radius-ulna length), HAL (hand length), THL (thigh length), TL (tibia length), FL (foot length, including tarsus), 3FD (third finger disc diameter), and 4TD (fourth toe disc diameter).

| **Number** | **M/F** | **SVL** | **HL** | **HW** | **ED** | **END** | **TD** | **UEW** | **IOD** | **IND** | **NSD** | **HU** | **RUL** | **HAL** | **THL** | **TL** | **FL** | **3FD** | **4TD** |
| --- | --- | --- | --- | --- | --- | --- | --- | --- | --- | --- | --- | --- | --- | --- | --- | --- | --- | --- | --- |
| UFBA 2453 | F | 27.0 | 8.6 | 8.8 | 2.4 | 2.4 | 0.9 | 1.9 | 3.7 | 1.9 | 0.9 | 7.4 | 5.6 | 7.9 | 13.5 | 14.8 | 20.3 | 1.3 | 1.2 |
| UFBA 7351 | F | 28.7 | 8.1 | 8.5 | 3.4 | 2.1 | 1.3 | 2.5 | 3.9 | 2.4 | 1.0 | 7.4 | 6.5 | 8.6 | 15.0 | 15.4 | 20.8 | 1.8 | 1.6 |
| UFBA 7352 | M | 24.8 | 7.9 | 7.8 | 2.9 | 2.0 | 1.1 | 2.5 | 3.1 | 1.9 | 0.8 | 7.3 | 5.7 | 7.9 | 13.6 | 14.6 | 19.2 | 1.5 | 1.3 |
| UFBA 6043 | M | 25.2 | 7.8 | 7.7 | 2.9 | 2.3 | 0.7 | 2.3 | 3.3 | 1.9 | 0.8 | 7.1 | 5.4 | 7.1 | 12.9 | 13.3 | 18.9 | 1.2 | 1.1 |
| UFBA 6211 | M | 24.5 | 7.4 | 7.2 | 2.4 | 2.1 | 1.1 | 2.3 | 2.6 | 1.5 | 0.7 | 6.1 | 5.6 | 7.1 | 13.2 | 13.2 | 18.6 | 1.0 | 1.0 |
| UFBA 6212 | F | 30.0 | 8.8 | 9.1 | 3.1 | 2.7 | 1.3 | 2.3 | 3.7 | 2.1 | 0.9 | 8.5 | 6.5 | 8.5 | 16.6 | 17.1 | 23.4 | 1.5 | 1.2 |
| UFBA 4334 | 1 | 27.7 | 8.5 | 8.5 | 3.0 | 1.8 | 1.3 | 2.6 | 3.2 | 1.9 | 0.9 | 7.6 | 6.7 | 7.6 | 13.8 | 14.3 | 19.7 | 1.3 | 1.2 |
| UFBA 4335 | 1 | 28.1 | 8.5 | 8.4 | 2.6 | 2.3 | 1.4 | 3.4 | 3.6 | 1.9 | 0.9 | 7.9 | 6.0 | 8.5 | 13.7 | 14.4 | 20.5 | 1.2 | 1.2 |
| UFBA 4336 | 1 | 25.8 | 7.1 | 7.0 | 2.5 | 2.0 | 0.9 | 2.7 | 3.2 | 1.4 | 0.7 | 6.5 | 5.6 | 7.0 | 12.7 | 13.3 | 18.8 | 1.3 | 1.1 |
| UFBA 4337 | 1 | 25.5 | 8.0 | 7.8 | 3.0 | 1.8 | 0.7 | 2.7 | 3.6 | 1.6 | 0.9 | 7.1 | 6.0 | 6.8 | 13.2 | 13.8 | 19.0 | 1.2 | 1.2 |
| UFBA 4338 | 1 | 25.4 | 7.9 | 7.5 | 3.2 | 2.2 | 1.2 | 2.3 | 3.4 | 1.4 | 0.8 | 7.4 | 5.5 | 7.3 | 12.9 | 13.6 | 18.6 | 1.3 | 1.2 |
| UFBA 4339 | 1 | 24.4 | 7.4 | 7.4 | 2.8 | 2.3 | 1.1 | 2.4 | 3.2 | 1.6 | 0.8 | 7.0 | 5.8 | 6.6 | 11.9 | 12.8 | 17.2 | 1.2 | 1.1 |
| UFBA 4340 | 2 | 32.2 | 9.5 | 9.6 | 3.0 | 2.6 | 1.4 | 3.0 | 3.5 | 1.9 | 1.1 | 8.6 | 6.6 | 8.3 | 15.7 | 16.6 | 22.6 | 1.6 | 1.5 |
| UFBA 4341 | 1 | 26.5 | 7.8 | 7.8 | 3.1 | 1.6 | 0.9 | 1.6 | 3.1 | 1.6 | 0.7 | 7.4 | 5.8 | 7.1 | 13.3 | 14.3 | 18.5 | 1.4 | 1.3 |
| UFBA 4342 | 1 | 25.5 | 8.1 | 7.5 | 2.7 | 2.0 | 1.2 | 2.4 | 3.1 | 1.8 | 0.7 | 6.6 | 5.9 | 7.2 | 13.7 | 14.4 | 19.5 | 1.4 | 1.2 |
| UFBA 4343 | 1 | 25.0 | 7.8 | 7.6 | 2.8 | 2.3 | 1.1 | 2.4 | 3.3 | 1.5 | 0.7 | 7.1 | 6.0 | 7.6 | 13.4 | 14.5 | 20.1 | 1.3 | 1.3 |
| UFBA 2623 | 1 | 24.7 | 7.9 | 8.4 | 2.8 | 2.1 | 1.1 | 2.5 | 3.4 | 2.2 | 1.1 | 7.5 | 5.5 | 7.7 | 12.9 | 14.0 | 18.9 | 1.3 | 1.3 |
| UFBA 2624 | 1 | 26.3 | 8.1 | 8.4 | 2.7 | 2.2 | 1.3 | 2.3 | 3.2 | 1.9 | 0.8 | 7.3 | 5.9 | 7.8 | 13.1 | 13.9 | 19.6 | 1.2 | 1.3 |
| UFBA 2625 | 1 | 25.8 | 7.1 | 8.2 | 2.6 | 2.0 | 1.2 | 2.2 | 3.7 | 1.9 | 0.9 | 6.2 | 5.9 | 8.5 | 13.3 | 14.4 | 20.3 | 1.4 | 1.3 |
| UFBA 2626 | 1 | 23.0 | 7.7 | 7.6 | 2.8 | 2.0 | 1.0 | 2.4 | 3.3 | 1.9 | 0.9 | 6.5 | 5.3 | 7.0 | 11.4 | 12.2 | 17.3 | 1.3 | 1.2 |
| UFBA 2627 | 2 | 23.9 | 9.0 | 9.1 | 2.6 | 2.0 | 1.8 | 2.3 | 3.8 | 2.2 | 1.0 | 8.3 | 6.5 | 8.7 | 14.8 | 15.7 | 21.4 | 1.6 | 1.5 |
| UFBA 2628 | 1 | 25.6 | 8.2 | 8.0 | 3.0 | 2.1 | 1.6 | 2.4 | 3.5 | 1.8 | 0.8 | 7.7 | 5.8 | 7.6 | 13.1 | 14.2 | 19.4 | 1.2 | 1.3 |
| UFBA 2629 | 2 | 30.1 | 9.5 | 9.7 | 3.1 | 2.3 | 1.4 | 2.4 | 4.4 | 2.1 | 1.1 | 8.3 | 7.0 | 9.3 | 16.4 | 16.9 | 23.5 | 1.9 | 1.3 |
| UFBA 2630 | 1 | 24.3 | 7.7 | 7.8 | 2.6 | 1.8 | 1.1 | 2.3 | 2.9 | 1.5 | 0.8 | 7.1 | 5.4 | 7.5 | 12.8 | 13.3 | 18.2 | 1.0 | 0.9 |
| UFBA 2631 | 1 | 23.7 | 7.6 | 7.2 | 2.6 | 1.6 | 1.2 | 2.3 | 3.4 | 2.0 | 0.8 | 7.1 | 5.4 | 8.0 | 12.3 | 13.1 | 18.5 | 1.1 | 1.0 |
| UFBA 2632 | 1 | 24.5 | 7.2 | 7.5 | 2.4 | 1.9 | 0.8 | 2.8 | 3.1 | 1.9 | 0.8 | 7.1 | 5.2 | 7.6 | 12.8 | 13.2 | 18.3 | 1.2 | 1.0 |
| UFBA 2633 | 1 | 24.4 | 7.5 | 7.9 | 2.7 | 2.1 | 1.1 | 1.6 | 4.0 | 1.9 | 0.9 | 6.9 | 5.6 | 8.3 | 13.1 | 14.0 | 18.6 | 1.2 | 1.0 |
| UFBA 2634 | 1 | 24.2 | 7.5 | 8.0 | 3.0 | 1.9 | 1.2 | 2.0 | 3.4 | 1.4 | 0.8 | 6.5 | 5.4 | 8.1 | 12.9 | 14.0 | 19.5 | 1.2 | 1.1 |
| UFBA 2635 | 1 | 24.0 | 8.1 | 7.9 | 2.8 | 1.5 | 1.1 | 2.0 | 3.1 | 1.6 | 0.8 | 6.8 | 5.5 | 8.0 | 13.2 | 14.1 | 19.8 | 1.0 | 0.9 |
| UFBA 2636 | 1 | 24.8 | 8.0 | 8.1 | 2.9 | 2.2 | 1.2 | 2.4 | 3.3 | 1.9 | 0.9 | 6.7 | 5.6 | 7.6 | 12.3 | 14.3 | 19.4 | 1.2 | 1.3 |
| UFBA 2637 | 1 | 25.0 | 7.7 | 7.4 | 2.7 | 2.1 | 1.3 | 2.3 | 3.0 | 1.6 | 0.8 | 6.5 | 5.8 | 7.5 | 12.8 | 13.3 | 18.5 | 1.2 | 1.0 |
| UFBA 2638 | 2 | 31.8 | 9.2 | 8.7 | 3.0 | 2.2 | 1.3 | 2.7 | 3.8 | 1.9 | 1.0 | 8.7 | 6.8 | 8.8 | 16.0 | 16.5 | 22.4 | 1.4 | 1.4 |
| UFBA 2639 | 2 | 27.5 | 9.6 | 9.0 | 3.0 | 2.3 | 1.2 | 2.3 | 3.9 | 2.3 | 1.1 | 8.5 | 6.2 | 9.1 | 15.1 | 15.9 | 22.5 | 1.2 | 1.4 |
| UFBA 2677 | 1 | 25.4 | 8.3 | 8.7 | 2.8 | 2.0 | 1.1 | 2.5 | 3.2 | 1.9 | 0.9 | 7.7 | 5.6 | 8.1 | 13.4 | 14.3 | 19.7 | 1.3 | 1.3 |
| UFBA 2678 | 1 | 26.5 | 8.5 | 9.0 | 2.9 | 2.3 | 1.3 | 2.0 | 4.2 | 1.8 | 0.9 | 7.5 | 5.9 | 8.0 | 13.8 | 15.0 | 20.7 | 1.5 | 1.4 |
| UFBA 2679 | 1 | 26.1 | 8.2 | 8.7 | 2.8 | 2.5 | 1.2 | 2.4 | 3.8 | 2.0 | 1.0 | 7.7 | 5.9 | 8.5 | 14.1 | 14.6 | 20.3 | 1.2 | 1.2 |
| UFBA 2680 | 1 | 25.0 | 7.5 | 8.5 | 2.8 | 2.1 | 0.8 | 2.4 | 3.6 | 1.8 | 0.8 | 7.5 | 6.0 | 7.8 | 13.5 | 14.2 | 19.6 | 1.2 | 1.3 |
| UFBA 2681 | 1 | 26.0 | 8.5 | 8.4 | 2.8 | 1.9 | 1.1 | 2.1 | 3.7 | 1.9 | 1.0 | 6.7 | 5.9 | 8.2 | 13.4 | 14.4 | 19.9 | 1.2 | 1.2 |
| UFBA 2682 | 1 | 24.7 | 8.2 | 8.0 | 2.8 | 2.0 | 1.3 | 2.6 | 3.4 | 1.6 | 0.8 | 6.5 | 5.7 | 7.5 | 13.0 | 13.8 | 18.2 | 1.2 | 1.2 |
| UFBA 2683 | 2 | 29.7 | 9.2 | 9.0 | 2.6 | 1.8 | 1.2 | 2.3 | 4.3 | 2.1 | 1.0 | 8.7 | 6.3 | 9.3 | 15.5 | 13.4 | 22.4 | 1.5 | 1.4 |
| UFBA 2684 | 2 | 30.0 | 10.6 | 9.5 | 3.1 | 1.4 | 2.2 | 2.4 | 4.6 | 2.1 | 1.0 | 8.9 | 7.0 | 9.6 | 15.5 | 16.6 | 23.7 | 1.9 | 1.8 |
| UFBA 2685 | 1 | 25.8 | 8.3 | 8.0 | 2.9 | 2.3 | 1.4 | 2.3 | 3.8 | 1.9 | 1.0 | 6.9 | 5.6 | 8.0 | 13.9 | 14.6 | 19.7 | 1.5 | 1.4 |
| UFBA 2686 | 1 | 25.2 | 8.6 | 8.4 | 2.8 | 1.8 | 1.0 | 2.1 | 4.1 | 1.8 | 0.8 | 7.7 | 5.5 | 8.1 | 13.8 | 14.5 | 19.9 | 1.2 | 1.3 |
| UFBA 2687 | 2 | 27.4 | 8.9 | 8.7 | 2.7 | 1.8 | 0.9 | 1.9 | 4.3 | 2.0 | 0.9 | 8.1 | 6.4 | 8.4 | 15.9 | 16.3 | 22.3 | 1.4 | 1.3 |
| UFBA 2848 | 1 | 24.2 | 7.8 | 7.8 | 2.6 | 1.6 | 0.9 | 2.6 | 3.3 | 1.8 | 0.8 | 7.5 | 6.5 | 7.9 | 12.5 | 13.7 | 18.7 | 1.1 | 1.1 |
| UFBA 2769 | 1 | 25.3 | 7.6 | 7.9 | 2.9 | 2.2 | 1.2 | 2.3 | 3.4 | 1.6 | 0.9 | 6.4 | 5.3 | 7.6 | 13.3 | 18.8 | 19.4 | 1.1 | 1.2 |
| UFBA 2770 | 1 | 23.9 | 7.9 | 7.5 | 2.6 | 1.8 | 1.3 | 2.1 | 3.6 | 1.8 | 0.9 | 6.3 | 5.3 | 7.7 | 13.1 | 13.7 | 19.0 | 1.3 | 1.2 |
| UFBA 2771 | 1 | 24.0 | 7.3 | 7.8 | 2.7 | 1.6 | 0.8 | 2.4 | 3.8 | 1.9 | 0.9 | 6.1 | 5.4 | 7.4 | 14.1 | 14.4 | 18.4 | 1.1 | 1.0 |
| UFBA 2772 | 1 | 24.0 | 7.9 | 7.8 | 2.9 | 1.9 | 1.1 | 2.5 | 3.3 | 1.9 | 1.0 | 7.2 | 5.5 | 8.1 | 13.1 | 14.1 | 19.0 | 1.1 | 1.1 |
| UFBA 8006 | 1 | 27.7 | 8.0 | 8.3 | 3.1 | 2.0 | 1.1 | 2.4 | 4.1 | 2.8 | 1.1 | 7.3 | 6.2 | 8.3 | 13.6 | 14.0 | 20.3 | 1.4 | 1.3 |
| UFBA 8007 | 1 | 26.9 | 8.0 | 8.5 | 3.1 | 2.2 | 1.3 | 2.4 | 4.1 | 2.5 | 1.2 | 7.4 | 6.1 | 7.7 | 14.4 | 15.1 | 20.8 | 1.3 | 1.3 |
| UFBA 8008 | 1 | 24.3 | 7.5 | 8.1 | 2.7 | 2.1 | 1.1 | 2.3 | 3.7 | 2.2 | 1.0 | 7.3 | 5.6 | 7.4 | 13.7 | 14.1 | 19.2 | 1.2 | 1.2 |
| UFBA 8009 | 1 | 26.2 | 8.0 | 8.4 | 3.1 | 2.2 | 1.4 | 2.6 | 3.6 | 2.2 | 0.9 | 6.4 | 6.1 | 7.8 | 13.7 | 14.8 | 20.3 | 1.1 | 1.2 |
| UFBA 8010 | 1 | 27.0 | 8.4 | 8.4 | 2.9 | 2.2 | 1.2 | 2.6 | 3.8 | 2.0 | 0.9 | 7.0 | 6.3 | 8.0 | 13.4 | 14.3 | 19.9 | 1.2 | 1.2 |
| UFBA 7867 | 1 | 26.6 | 8.2 | 8.6 | 2.9 | 2.1 | 1.5 | 2.4 | 3.7 | 1.9 | 0.9 | 6.9 | 5.6 | 7.3 | 13.4 | 14.2 | 18.5 | 1.2 | 1.1 |
| UFBA 7870 | 1 | 27.1 | 8.4 | 8.4 | 3.2 | 2.1 | 1.1 | 2.2 | 3.7 | 2.1 | 1.0 | 7.1 | 5.9 | 8.1 | 13.3 | 14.1 | 19.7 | 1.3 | 1.2 |
| UFBA 7871 | 1 | 26.8 | 7.3 | 7.9 | 3.1 | 2.1 | 1.2 | 1.8 | 3.4 | 1.9 | 1.0 | 7.2 | 5.7 | 7.7 | 13.5 | 14.5 | 19.5 | 1.3 | 1.2 |
| UFBA 7872 | 1 | 25.7 | 7.5 | 7.9 | 2.9 | 2.0 | 1.5 | 1.9 | 3.4 | 1.6 | 1.0 | 6.5 | 5.4 | 7.0 | 12.1 | 13.1 | 18.1 | 1.2 | 1.2 |
| UFBA 7873 | 2 | 34.2 | 9.9 | 10.6 | 3.6 | 2.4 | 1.9 | 2.3 | 4.9 | 2.7 | 1.4 | 9.0 | 7.3 | 9.8 | 17.1 | 18.2 | 25.0 | 1.9 | 2.0 |
| UFBA 7874 | 1 | 26.0 | 8.0 | 8.3 | 3.2 | 1.9 | 1.1 | 2.1 | 3.5 | 1.9 | 1.0 | 6.5 | 5.5 | 7.3 | 12.8 | 13.7 | 18.2 | 1.0 | 1.1 |
| UFBA 7875 | 1 | 26.9 | 8.3 | 8.1 | 3.0 | 2.3 | 1.2 | 2.5 | 3.6 | 1.8 | 1.0 | 7.1 | 6.2 | 8.5 | 13.8 | 14.5 | 20.3 | 1.2 | 1.2 |
| UFBA 7876 | 1 | 28.6 | 8.4 | 8.7 | 2.7 | 2.6 | 0.9 | 2.3 | 3.6 | 2.0 | 1.0 | 7.3 | 6.1 | 8.3 | 13.9 | 14.8 | 20.3 | 1.5 | 1.4 |
| UFBA 7877 | 1 | 26.4 | 8.1 | 8.3 | 3.1 | 1.8 | 1.1 | 2.6 | 3.3 | 1.9 | 0.8 | 7.4 | 6.0 | 8.6 | 13.3 | 14.1 | 18.9 | 1.4 | 1.3 |
| UFBA 7878 | 1 | 26.3 | 7.9 | 8.7 | 2.9 | 1.6 | 1.0 | 2.2 | 3.6 | 2.1 | 1.0 | 6.5 | 6.1 | 8.0 | 13.2 | 14.0 | 20.0 | 1.3 | 1.4 |
| UFBA 8222 | 1 | 25.6 | 8.6 | 8.4 | 3.1 | 2.3 | 1.3 | 2.7 | 3.6 | 2.0 | 0.9 | 7.6 | 6.9 | 8.5 | 14.1 | 14.6 | 20.4 | 1.5 | 1.2 |
| UFBA 8223 | 1 | 26.2 | 8.2 | 8.8 | 3.0 | 2.3 | 1.2 | 2.7 | 3.6 | 1.8 | 0.8 | 7.1 | 6.5 | 8.2 | 13.8 | 14.1 | 19.7 | 1.2 | 1.1 |
| UFBA 8224 | 1 | 25.8 | 7.9 | 8.0 | 2.9 | 2.2 | 1.3 | 2.5 | 3.5 | 1.8 | 0.8 | 7.6 | 6.8 | 8.3 | 13.8 | 14.7 | 19.5 | 1.4 | 1.2 |
| UFBA 4430 | 1 | 25.5 | 8.1 | 8.6 | 3.0 | 1.8 | 1.2 | 2.5 | 2.9 | 2.0 | 0.8 | 7.4 | 5.7 | 7.5 | 12.6 | 13.2 | 18.3 | 1.4 | 1.5 |
| UFBA 6468 | 1 | 27.1 | 7.6 | 7.8 | 2.8 | 2.0 | 0.8 | 2.4 | 3.0 | 1.9 | 0.7 | 7.9 | 5.4 | 7.6 | 13.0 | 13.9 | 19.4 | 1.3 | 1.2 |
| UFBA 5868 | 2 | 27.2 | 7.8 | 8.0 | 2.9 | 2.0 | 0.8 | 2.6 | 3.0 | 2.0 | 0.8 | 7.0 | 5.8 | 8.0 | 13.6 | 14.2 | 20.2 | 1.4 | 1.3 |
| UFBA 2061 | 2 | 35.1 | 10.4 | 10.4 | 3.4 | 2.2 | 1.4 | 2.9 | 4.0 | 2.5 | 1.2 | 9.3 | 6.7 | 9.2 | 16.0 | 17.9 | 24.9 | 1.6 | 1.5 |
| MZUSP 126388 | 1 | 27.9 | 8.6 | 9.5 | 3.9 | 3.4 | 1.3 | 2.8 | 4.5 | 2.4 | 1.3 | 8.3 | 6.3 | 8.2 | 14.1 | 15.3 | 19.6 | 1.6 | 1.6 |
| MZUSP 126389 | 1 | 28.2 | 8.6 | 9.4 | 4.0 | 3.3 | 1.8 | 3.4 | 4.1 | 2.6 | 1.4 | 7.5 | 6.4 | 8.6 | 13.5 | 14.6 | 19.6 | 2.0 | 1.9 |
| MZUSP 126390 | 1 | 26.1 | 7.7 | 8.7 | 3.5 | 2.6 | 1.4 | 3.1 | 4.6 | 2.3 | 1.6 | 7.2 | 6.2 | 7.3 | 12.7 | 14.6 | 18.6 | 1.8 | 1.8 |
| MZUSP 126391 | 2 | 34.5 | 10.3 | 10.7 | 4.0 | 3.3 | 2.1 | 3.5 | 5.1 | 2.8 | 1.5 | 9.5 | 7.1 | 10.3 | 15.8 | 17.7 | 24.8 | 2.5 | 2.1 |
| MZUSP 126392 | 1 | 28.6 | 9.0 | 10.3 | 3.9 | 3.4 | 1.4 | 3.5 | 4.1 | 2.5 | 1.3 | 8.2 | 6.5 | 8.5 | 15.0 | 16.2 | 21.3 | 1.8 | 1.8 |
| MZUSP 126393 | 1 | 26.8 | 8.1 | 9.5 | 3.8 | 2.5 | 1.9 | 3.5 | 4.3 | 2.5 | 1.3 | 8.2 | 6.8 | 8.5 | 13.9 | 14.9 | 20.1 | 1.6 | 1.8 |
| MZUSP 126394 | 2 | 35.9 | 10.3 | 11.2 | 4.3 | 3.5 | 1.5 | 3.1 | 5.1 | 3.1 | 1.5 | 10.4 | 7.8 | 10.5 | 17.7 | 18.8 | 26.4 | 2.6 | 2.3 |
| MZUSP 126395 | 1 | 28.9 | 9.0 | 9.4 | 3.8 | 3.5 | 1.0 | 3.4 | 4.8 | 2.5 | 1.0 | 8.4 | 6.7 | 8.2 | 14.1 | 14.9 | 20.2 | 1.9 | 1.9 |
| MZUSP 126397 | 2 | 34.5 | 10.2 | 10.9 | 3.9 | 4.1 | 1.8 | 3.3 | 5.0 | 2.6 | 1.4 | 9.5 | 7.4 | 10.2 | 16.2 | 17.5 | 24.3 | 2.3 | 1.9 |
| MZUSP 126398 | 2 | 36.6 | 10.0 | 11.3 | 3.6 | 3.4 | 1.6 | 4.0 | 6.1 | 3.0 | 1.8 | 9.7 | 7.7 | 10.4 | 17.4 | 18.1 | 24.9 | 2.5 | 2.0 |
| MZUSP 126399 | 1 | 28.2 | 8.2 | 9.1 | 3.8 | 3.0 | 1.4 | 3.1 | 4.0 | 2.4 | 1.3 | 8.2 | 6.4 | 8.5 | 14.4 | 15.2 | 21.2 | 2.1 | 1.8 |
| MZUSP 126400 | 1 | 28.2 | 8.0 | 9.2 | 3.9 | 3.3 | 1.5 | 3.6 | 4.4 | 2.4 | 1.1 | 8.4 | 6.6 | 8.5 | 14.8 | 15.7 | 21.5 | 1.9 | 2.3 |
| MZUSP 126401 | 1 | 29.2 | 8.6 | 10.3 | 3.5 | 3.3 | 1.6 | 3.1 | 4.6 | 2.4 | 1.0 | 8.2 | 6.5 | 8.5 | 14.4 | 14.9 | 20.1 | 1.8 | 1.6 |
| MZUSP 126402 | 1 | 28.1 | 8.7 | 9.3 | 3.8 | 3.3 | 1.6 | 3.3 | 4.3 | 2.5 | 1.1 | 8.0 | 6.4 | 8.5 | 14.6 | 15.2 | 20.7 | 1.6 | 1.6 |
| MZUSP 126403 | 1 | 29.3 | 8.9 | 10.0 | 4.3 | 2.9 | 1.8 | 3.4 | 4.4 | 2.8 | 1.1 | 8.1 | 6.9 | 8.8 | 15.5 | 16.3 | 21.9 | 1.9 | 1.9 |
| MZUSP 126404 | 1 | 28.5 | 8.1 | 8.7 | 3.8 | 3.1 | 1.5 | 3.5 | 4.3 | 2.6 | 1.3 | 8.1 | 6.5 | 8.3 | 14.3 | 15.0 | 20.9 | 1.9 | 1.8 |
| MZUSP 126405 | 2 | 34.5 | 10.7 | 11.4 | 4.1 | 3.9 | 1.9 | 3.5 | 5.4 | 3.0 | 1.4 | 9.8 | 7.1 | 10.7 | 16.8 | 18.4 | 26.2 | 2.3 | 2.3 |
| MZUSP 126406 | 1 | 28.4 | 8.8 | 8.9 | 3.8 | 3.0 | 1.3 | 2.6 | 3.6 | 2.4 | 1.1 | 7.8 | 6.7 | 9.2 | 13.6 | 15.2 | 21.4 | 1.9 | 1.5 |
| MZUSP 126407 | 1 | 29.2 | 9.4 | 9.5 | 3.6 | 2.0 | 1.6 | 2.5 | 4.9 | 3.0 | 1.4 | 8.8 | 6.9 | 9.2 | 15.2 | 18.3 | 21.8 | 1.8 | 1.9 |
| MZUSP 126409 | 1 | 26.9 | 8.1 | 9.6 | 3.4 | 2.5 | 1.0 | 2.9 | 3.6 | 2.6 | 1.4 | 7.7 | 6.1 | 8.6 | 12.9 | 13.8 | 19.4 | 1.8 | 1.5 |
| MZUSP 126410 | 2 | 34.5 | 9.8 | 10.8 | 3.9 | 3.8 | 1.4 | 2.6 | 4.9 | 2.9 | 1.4 | 9.8 | 7.0 | 9.7 | 15.5 | 17.8 | 24.5 | 2.1 | 1.9 |
| UFBA 3954 | 1 | 25.2 | 7.9 | 8.2 | 2.6 | 2.1 | 0.8 | 2.4 | 3.3 | 2.5 | 1.1 | 7.5 | 5.7 | 7.1 | 13.4 | 14.2 | 19.1 | 1.3 | 1.1 |
| UFBA 3955 | 1 | 25.5 | 8.1 | 7.7 | 2.9 | 1.8 | 0.8 | 2.4 | 3.4 | 2.2 | 0.9 | 7.2 | 5.3 | 7.5 | 13.1 | 14.2 | 19.7 | 1.1 | 1.0 |
| UFBA 7577 | 1 | 27.5 | 7.2 | 8.5 | 3.2 | 1.9 | 0.9 | 2.4 | 3.6 | 1.8 | 0.8 | 7.7 | 6.1 | 8.0 | 13.9 | 14.3 | 20.0 | 1.3 | 1.2 |
| UFBA 7578 | 1 | 27.0 | 8.1 | 8.4 | 3.3 | 2.2 | 1.1 | 2.6 | 3.3 | 1.6 | 0.9 | 7.3 | 6.1 | 7.6 | 13.4 | 14.0 | 19.3 | 1.5 | 1.4 |
| UFBA 7579 | 1 | 29.1 | 8.5 | 8.9 | 3.0 | 2.6 | 1.3 | 2.4 | 3.7 | 2.1 | 1.0 | 7.8 | 6.2 | 8.1 | 14.4 | 14.9 | 20.7 | 1.4 | 1.3 |
| UFBA 7580 | 1 | 28.1 | 8.0 | 8.1 | 3.2 | 2.0 | 1.0 | 2.5 | 3.2 | 1.9 | 1.0 | 7.8 | 5.6 | 7.9 | 13.8 | 14.6 | 20.2 | 1.3 | 1.2 |
| UFBA 7581 | 1 | 25.8 | 7.8 | 7.9 | 2.9 | 2.2 | 1.3 | 2.4 | 3.8 | 1.6 | 0.8 | 7.5 | 6.0 | 6.8 | 13.3 | 14.0 | 19.4 | 1.3 | 1.2 |
| UFBA 3103 | 1 | 28.8 | 9.2 | 9.1 | 3.0 | 2.2 | 0.8 | 2.8 | 3.5 | 2.2 | 1.1 | 8.1 | 6.4 | 9.3 | 15.1 | 16.0 | 21.8 | 1.4 | 1.4 |
| UFBA 3104 | 2 | 33.0 | 10.4 | 10.2 | 2.9 | 2.3 | 1.3 | 2.7 | 4.0 | 2.0 | 1.1 | 9.2 | 6.9 | 10.2 | 16.8 | 17.7 | 24.6 | 1.9 | 1.6 |
| UFBA 3105 | 1 | 27.0 | 8.5 | 8.7 | 3.0 | 2.2 | 0.8 | 2.4 | 3.6 | 2.1 | 1.0 | 7.6 | 5.9 | 8.2 | 14.5 | 15.4 | 20.6 | 1.2 | 1.2 |
| UFBA 3106 | 1 | 25.4 | 8.0 | 8.0 | 2.6 | 1.9 | 1.2 | 2.1 | 4.1 | 1.9 | 0.9 | 6.6 | 5.6 | 7.7 | 13.3 | 14.2 | 18.9 | 1.2 | 1.2 |
| UFBA 3107 | 1 | 24.2 | 7.3 | 8.2 | 2.6 | 2.0 | 1.0 | 2.1 | 3.5 | 1.8 | 0.9 | 6.6 | 5.2 | 6.8 | 12.0 | 12.9 | 17.1 | 1.3 | 1.3 |
| UFBA 3108 | 1 | 27.1 | 8.4 | 8.6 | 2.8 | 2.2 | 0.9 | 2.7 | 3.2 | 1.8 | 0.8 | 7.9 | 6.2 | 8.0 | 14.0 | 14.7 | 20.5 | 1.2 | 1.2 |
| UFBA 3109 | 1 | 25.8 | 8.9 | 8.4 | 2.8 | 2.1 | 1.2 | 2.4 | 3.6 | 2.0 | 1.0 | 7.1 | 5.9 | 8.6 | 13.5 | 13.5 | 18.8 | 1.3 | 1.3 |
| UFBA 3110 | 1 | 23.7 | 7.6 | 7.9 | 2.6 | 2.1 | 0.9 | 2.4 | 3.3 | 1.8 | 0.9 | 6.4 | 5.6 | 7.2 | 12.4 | 13.1 | 18.0 | 1.1 | 1.1 |
| UFBA 3111 | 1 | 25.3 | 7.9 | 8.1 | 3.0 | 2.0 | 1.0 | 2.3 | 3.3 | 1.6 | 0.8 | 6.7 | 5.7 | 8.0 | 13.5 | 14.6 | 19.2 | 1.3 | 1.2 |
| UFBA 3112 | 1 | 25.0 | 7.6 | 7.7 | 2.7 | 1.6 | 1.0 | 2.4 | 3.8 | 1.9 | 0.9 | 6.3 | 5.8 | 7.5 | 12.6 | 13.6 | 18.3 | 1.2 | 1.2 |
| UFBA 3113 | 1 | 25.0 | 7.6 | 7.8 | 2.7 | 1.9 | 0.7 | 2.5 | 3.7 | 1.8 | 0.9 | 6.3 | 5.3 | 7.4 | 12.0 | 12.6 | 17.4 | 1.1 | 1.1 |
| UFBA 3114 | 1 | 25.2 | 8.0 | 8.1 | 2.8 | 2.2 | 1.1 | 2.6 | 3.5 | 1.6 | 0.8 | 6.9 | 5.7 | 7.8 | 12.8 | 13.7 | 18.4 | 1.2 | 1.1 |
| UFBA 3116 | 1 | 26.3 | 8.5 | 8.7 | 3.2 | 2.2 | 1.0 | 2.7 | 3.6 | 1.8 | 0.8 | 7.0 | 6.1 | 7.9 | 13.9 | 15.0 | 19.7 | 1.3 | 1.2 |
| UFBA 3117 | 1 | 23.6 | 7.4 | 7.9 | 2.6 | 2.4 | 1.0 | 2.3 | 3.2 | 1.8 | 0.8 | 7.4 | 5.5 | 7.1 | 11.6 | 12.4 | 16.8 | 1.3 | 1.2 |
| UFBA 3118 | 1 | 24.4 | 7.6 | 7.9 | 2.4 | 2.6 | 0.7 | 2.0 | 3.9 | 1.8 | 0.9 | 6.6 | 5.6 | 7.2 | 12.2 | 12.9 | 17.6 | 1.1 | 1.0 |
| MNRJ 46374 | 1 | 26.9 | 7.9 | 8.0 | 2.9 | 2.3 | 0.9 | 2.4 | 3.0 | 1.8 | 0.8 | 7.6 | 6.3 | 8.7 | 14.2 | 14.2 | 20.5 | 1.3 | 1.2 |
| MNRJ 46375 | 2 | 32.4 | 9.1 | 10.0 | 2.9 | 2.7 | 1.2 | 2.6 | 4.2 | 2.0 | 1.1 | 9.0 | 7.1 | 10.4 | 16.2 | 16.5 | 23.8 | 1.9 | 1.6 |
| MNRJ 46376 | 1 | 26.9 | 7.7 | 7.8 | 2.8 | 2.2 | 1.1 | 2.4 | 3.0 | 1.4 | 0.8 | 7.4 | 6.5 | 8.8 | 13.0 | 13.8 | 19.8 | 1.4 | 1.3 |
| MNRJ 46377 | 1 | 26.1 | 8.0 | 7.9 | 2.8 | 2.3 | 1.1 | 2.3 | 2.8 | 1.9 | 1.1 | 7.4 | 6.3 | 8.5 | 13.1 | 13.7 | 19.4 | 1.3 | 1.2 |
| MNRJ 46378 | 1 | 25.5 | 7.8 | 7.9 | 2.6 | 2.3 | 1.4 | 2.7 | 2.9 | 1.8 | 1.0 | 7.3 | 6.0 | 8.1 | 12.9 | 13.2 | 18.3 | 1.3 | 1.2 |
| MNRJ 46379 | 1 | 26.8 | 7.4 | 7.8 | 2.9 | 2.2 | 0.9 | 2.7 | 2.9 | 1.8 | 0.8 | 7.9 | 6.1 | 9.1 | 13.7 | 14.2 | 20.0 | 1.2 | 1.1 |
| MNRJ 46380 | 1 | 27.0 | 7.9 | 8.4 | 2.9 | 2.4 | 1.4 | 2.5 | 2.9 | 1.9 | 0.9 | 7.9 | 6.2 | 8.6 | 13.1 | 13.2 | 18.9 | 1.4 | 1.3 |
| MNRJ 46381 | 1 | 27.3 | 7.5 | 8.4 | 2.9 | 2.2 | 1.3 | 2.6 | 3.0 | 1.9 | 1.0 | 7.6 | 6.4 | 8.7 | 13.2 | 13.6 | 19.4 | 1.5 | 1.5 |
| MNRJ 46382 | 1 | 26.0 | 7.6 | 8.1 | 2.6 | 2.2 | 1.0 | 2.4 | 2.8 | 1.6 | 0.8 | 7.4 | 6.1 | 7.8 | 13.0 | 13.5 | 19.1 | 1.3 | 1.1 |
| MNRJ 46383 | 1 | 25.3 | 7.4 | 7.7 | 2.6 | 2.2 | 1.2 | 2.5 | 3.0 | 1.6 | 0.8 | 7.6 | 5.9 | 8.7 | 12.6 | 13.1 | 18.5 | 1.3 | 1.1 |
| MNRJ 46384 | 1 | 25.7 | 7.4 | 7.6 | 2.8 | 2.2 | 1.0 | 2.5 | 3.1 | 1.5 | 1.0 | 7.3 | 6.0 | 8.3 | 12.3 | 12.9 | 18.3 | 1.3 | 1.2 |
| MNRJ 46385 | 1 | 27.9 | 7.8 | 7.9 | 2.8 | 2.2 | 0.9 | 2.6 | 3.0 | 2.0 | 1.0 | 8.0 | 6.4 | 8.6 | 13.8 | 14.2 | 20.2 | 1.4 | 1.3 |
| MNRJ 46386 | 1 | 27.5 | 8.0 | 8.2 | 3.0 | 2.1 | 0.9 | 2.6 | 3.0 | 1.9 | 1.0 | 7.6 | 5.8 | 8.6 | 13.6 | 13.6 | 19.2 | 1.2 | 1.1 |
| MNRJ 46387 | 1 | 25.8 | 7.6 | 7.9 | 2.7 | 2.3 | 1.0 | 2.6 | 2.9 | 1.6 | 0.9 | 7.5 | 5.7 | 7.9 | 12.6 | 12.8 | 17.9 | 1.2 | 1.1 |
| MNRJ 46388 | 1 | 25.6 | 8.2 | 8.1 | 2.7 | 2.2 | 1.3 | 2.7 | 3.1 | 1.9 | 1.0 | 7.9 | 6.2 | 8.6 | 13.3 | 13.6 | 19.9 | 1.5 | 1.3 |
| MNRJ 46389 | 1 | 27.5 | 7.9 | 8.1 | 2.9 | 2.2 | 1.2 | 2.5 | 3.1 | 1.8 | 1.0 | 8.4 | 6.5 | 8.7 | 14.2 | 14.7 | 19.5 | 1.4 | 1.3 |
| MNRJ 46390 | 1 | 24.9 | 7.3 | 7.7 | 2.7 | 2.0 | 0.8 | 2.5 | 2.9 | 1.8 | 1.0 | 7.1 | 5.8 | 8.0 | 12.4 | 12.6 | 18.5 | 1.4 | 1.2 |
| MNRJ 46391 | 1 | 24.6 | 7.7 | 8.8 | 2.6 | 2.1 | 1.1 | 2.5 | 2.9 | 2.0 | 1.1 | 7.0 | 6.1 | 8.0 | 12.4 | 13.1 | 18.3 | 1.1 | 1.1 |
| MNRJ 26275 | 1 | 26.1 | 8.1 | 8.1 | 2.7 | 2.2 | 1.1 | 2.5 | 2.9 | 1.6 | 0.9 | 7.6 | 6.2 | 7.9 | 13.2 | 13.3 | 18.0 | 1.2 | 1.0 |
| MNRJ 26276 | 1 | 27.4 | 8.4 | 8.3 | 2.9 | 2.2 | 1.1 | 2.6 | 2.8 | 1.8 | 0.9 | 7.7 | 5.9 | 8.1 | 13.7 | 13.6 | 19.7 | 1.3 | 1.1 |
| MNRJ 26277 | 1 | 28.6 | 8.3 | 8.7 | 2.8 | 2.2 | 1.2 | 2.3 | 3.2 | 1.9 | 1.1 | 8.2 | 6.7 | 8.3 | 14.4 | 15.2 | 20.8 | 1.2 | 1.2 |
| MNRJ 26278 | 1 | 25.8 | 8.0 | 8.1 | 2.6 | 2.2 | 1.2 | 2.6 | 3.3 | 1.9 | 0.9 | 7.6 | 6.1 | 8.5 | 13.6 | 13.9 | 19.3 | 1.4 | 1.2 |
| MNRJ 46433 | 2 | 35.5 | 9.4 | 10.3 | 3.2 | 2.8 | 1.4 | 3.6 | 3.5 | 2.1 | 1.1 | 10.0 | 7.6 | 11.1 | 17.7 | 18.2 | 25.7 | 2.1 | 1.9 |
| MNRJ 46434 | 1 | 26.2 | 7.4 | 7.8 | 2.7 | 2.1 | 1.0 | 2.6 | 2.9 | 1.6 | 0.9 | 7.6 | 5.9 | 8.5 | 13.3 | 14.0 | 19.4 | 1.5 | 1.4 |
| MNRJ 46435 | 1 | 26.8 | 8.2 | 8.3 | 2.9 | 2.3 | 1.0 | 2.8 | 3.1 | 1.8 | 0.9 | 8.0 | 6.2 | 8.6 | 13.3 | 13.9 | 19.2 | 1.6 | 1.5 |
| MNRJ 46436 | 1 | 27.4 | 7.9 | 8.5 | 2.9 | 2.3 | 1.2 | 2.7 | 2.9 | 2.0 | 0.9 | 8.1 | 6.4 | 8.6 | 14.0 | 14.3 | 19.5 | 1.6 | 1.5 |
| MNRJ 46437 | 1 | 26.6 | 7.6 | 7.9 | 3.0 | 2.0 | 1.2 | 2.6 | 2.8 | 1.6 | 0.9 | 7.6 | 5.9 | 7.9 | 12.9 | 13.4 | 18.4 | 1.4 | 1.4 |
| MNRJ 46438 | 1 | 28.8 | 8.4 | 8.6 | 2.7 | 2.4 | 1.1 | 2.6 | 3.2 | 2.0 | 1.0 | 8.2 | 6.6 | 9.0 | 14.0 | 14.7 | 20.4 | 1.5 | 1.5 |
| MNRJ 15519 | 1 | 25.3 | 7.6 | 7.8 | 2.7 | 2.1 | 1.1 | 2.6 | 3.0 | 1.6 | 1.0 | 7.1 | 6.2 | 7.6 | 12.1 | 13.0 | 17.7 | 1.3 | 1.2 |
| MNRJ 15520 | 1 | 23.1 | 7.2 | 7.3 | 2.5 | 2.1 | 1.1 | 2.3 | 2.9 | 2.0 | 1.0 | 7.0 | 5.3 | 7.8 | 11.9 | 13.2 | 17.5 | 1.4 | 1.2 |
| MNRJ 15521 | 1 | 23.6 | 8.9 | 7.8 | 2.7 | 1.9 | 1.1 | 2.2 | 3.0 | 1.6 | 0.9 | 7.3 | 5.9 | 7.7 | 12.4 | 13.1 | 17.4 | 1.3 | 1.2 |
| MNRJ 15522 | 1 | 25.0 | 7.5 | 7.6 | 2.7 | 2.0 | 0.9 | 2.3 | 3.1 | 1.8 | 1.0 | 7.1 | 5.9 | 7.3 | 12.3 | 12.9 | 18.2 | 1.2 | 1.1 |
| MNRJ 15523 | 1 | 26.0 | 7.7 | 7.9 | 2.7 | 2.1 | 1.1 | 2.5 | 3.0 | 1.6 | 0.9 | 7.4 | 5.5 | 7.4 | 12.5 | 13.2 | 17.7 | 1.2 | 1.1 |
| MNRJ 15524 | 1 | 26.6 | 8.2 | 8.2 | 2.7 | 2.2 | 1.1 | 2.4 | 3.2 | 1.8 | 0.9 | 7.5 | 6.0 | 8.3 | 13.2 | 13.8 | 18.5 | 1.3 | 1.2 |
| MNRJ 15525 | 1 | 25.5 | 7.7 | 8.2 | 2.8 | 2.2 | 1.0 | 2.4 | 3.0 | 1.8 | 0.8 | 7.2 | 6.1 | 7.9 | 13.3 | 13.4 | 18.4 | 1.3 | 1.2 |
| MNRJ 15526 | 1 | 24.6 | 7.1 | 7.5 | 2.6 | 2.1 | 1.0 | 2.5 | 3.0 | 1.6 | 1.0 | 7.4 | 5.9 | 7.9 | 12.3 | 12.6 | 17.8 | 1.2 | 1.0 |
| MNRJ 15527 | 1 | 23.9 | 7.7 | 7.6 | 2.6 | 2.2 | 1.2 | 2.1 | 3.3 | 1.8 | 1.0 | 7.0 | 5.6 | 7.2 | 12.2 | 12.9 | 17.0 | 1.2 | 1.1 |
| MNRJ 15528 | 1 | 26.3 | 8.0 | 8.2 | 2.9 | 2.2 | 1.1 | 2.5 | 2.9 | 1.8 | 1.0 | 6.8 | 5.6 | 7.2 | 12.3 | 12.9 | 17.8 | 1.5 | 1.3 |
| MNRJ 15529 | 1 | 25.3 | 7.7 | 8.0 | 2.7 | 2.2 | 1.0 | 2.2 | 3.1 | 1.6 | 0.9 | 6.7 | 5.5 | 7.0 | 12.4 | 12.9 | 18.3 | 1.3 | 1.3 |
| MNRJ 15530 | 1 | 26.1 | 7.7 | 7.9 | 2.6 | 2.3 | 1.0 | 2.6 | 3.0 | 1.8 | 0.9 | 7.6 | 6.1 | 7.9 | 12.9 | 13.2 | 19.0 | 1.2 | 1.2 |
| MNRJ 15531 | 1 | 23.5 | 7.2 | 7.8 | 2.7 | 2.0 | 1.2 | 2.6 | 2.9 | 1.8 | 0.8 | 7.0 | 5.8 | 8.0 | 11.9 | 12.2 | 16.9 | 1.4 | 1.2 |
| MNRJ 15532 | 1 | 26.3 | 8.3 | 8.6 | 2.9 | 2.0 | 1.1 | 2.6 | 3.1 | 2.1 | 1.0 | 7.7 | 6.5 | 8.2 | 13.3 | 13.9 | 18.4 | 1.5 | 1.4 |
| MNRJ 15533 | 1 | 27.7 | 8.4 | 8.3 | 3.0 | 2.3 | 1.0 | 2.8 | 3.4 | 2.0 | 0.9 | 7.6 | 6.2 | 7.9 | 13.2 | 14.0 | 18.6 | 1.4 | 1.3 |
| MNRJ 15534 | 1 | 25.1 | 7.5 | 7.6 | 2.7 | 2.2 | 1.2 | 2.2 | 3.0 | 1.6 | 0.9 | 7.1 | 5.8 | 7.8 | 12.4 | 13.0 | 18.0 | 1.3 | 1.1 |
| MNRJ 15535 | 1 | 24.7 | 7.2 | 7.5 | 2.6 | 2.1 | 1.0 | 2.2 | 2.8 | 1.9 | 0.8 | 7.1 | 5.9 | 7.8 | 11.9 | 12.9 | 17.4 | 1.3 | 1.2 |
| MNRJ 15536 | 1 | 26.6 | 7.7 | 8.3 | 3.0 | 2.3 | 1.1 | 2.7 | 3.1 | 1.4 | 0.7 | 7.2 | 5.6 | 8.0 | 12.3 | 13.1 | 18.0 | 1.4 | 1.3 |
| MNRJ 15537 | 1 | 25.5 | 7.4 | 7.8 | 2.8 | 2.2 | 1.0 | 2.5 | 2.8 | 1.5 | 0.9 | 7.1 | 5.6 | 8.4 | 12.3 | 13.4 | 18.0 | 1.4 | 1.2 |
| MNRJ 35736 | 1 | 23.8 | 7.6 | 7.8 | 2.8 | 2.2 | 1.1 | 2.6 | 3.1 | 1.9 | 1.0 | 6.9 | 5.8 | 7.7 | 12.4 | 13.0 | 18.3 | 1.3 | 1.2 |
| MNRJ 35738 | 1 | 23.7 | 7.2 | 7.6 | 2.7 | 2.2 | 0.9 | 2.4 | 3.2 | 1.8 | 0.8 | 6.7 | 5.8 | 7.4 | 11.9 | 12.4 | 17.9 | 1.3 | 1.2 |
| MNRJ 35739 | 1 | 25.2 | 7.4 | 8.2 | 2.7 | 2.3 | 1.1 | 2.4 | 3.1 | 2.0 | 1.0 | 7.9 | 6.2 | 8.0 | 12.4 | 13.0 | 18.3 | 1.4 | 1.3 |
| MNRJ 35740 | 1 | 25.7 | 7.5 | 8.2 | 2.8 | 2.2 | 1.2 | 2.3 | 3.6 | 1.9 | 0.9 | 7.7 | 5.9 | 8.5 | 13.2 | 13.8 | 19.4 | 1.3 | 1.3 |
| MNRJ 35741 | 1 | 26.0 | 7.9 | 7.9 | 2.9 | 2.4 | 1.2 | 2.4 | 3.2 | 1.9 | 0.8 | 7.5 | 5.8 | 8.0 | 12.8 | 13.2 | 18.8 | 1.5 | 1.4 |
| MNRJ 35742 | 1 | 25.6 | 7.4 | 7.7 | 2.7 | 2.2 | 0.9 | 2.5 | 3.2 | 2.1 | 1.0 | 7.0 | 5.5 | 7.7 | 12.1 | 12.6 | 17.8 | 1.0 | 1.1 |
| MNRJ 35743 | 1 | 27.7 | 8.0 | 8.5 | 3.0 | 2.4 | 1.1 | 2.3 | 3.3 | 2.1 | 1.0 | 7.8 | 6.1 | 8.6 | 13.9 | 14.3 | 19.5 | 1.3 | 1.3 |
| MNRJ 35744 | 1 | 23.7 | 7.9 | 7.6 | 2.9 | 2.1 | 1.2 | 2.2 | 3.2 | 1.9 | 1.1 | 7.6 | 5.5 | 8.0 | 12.1 | 12.7 | 18.1 | 1.4 | 1.3 |
| MNRJ 35745 | 1 | 27.3 | 7.9 | 7.9 | 2.9 | 2.5 | 1.2 | 2.7 | 3.8 | 2.0 | 1.0 | 8.0 | 6.2 | 8.9 | 13.9 | 14.5 | 20.2 | 1.4 | 1.4 |
| MNRJ 29644 | 1 | 28.7 | 9.2 | 9.1 | 3.1 | 2.6 | 0.9 | 3.0 | 3.5 | 2.1 | 0.9 | 8.7 | 6.9 | 9.4 | 14.8 | 15.9 | 21.8 | 1.2 | 1.3 |
| MNRJ 29645 | 1 | 29.5 | 8.9 | 9.6 | 3.1 | 2.7 | 1.1 | 2.6 | 3.3 | 2.0 | 1.0 | 8.7 | 7.1 | 9.8 | 15.0 | 15.9 | 22.2 | 1.6 | 1.6 |
| MNRJ 29646 | 1 | 28.4 | 9.2 | 9.5 | 3.1 | 2.6 | 1.2 | 2.8 | 3.6 | 2.0 | 1.0 | 8.5 | 6.8 | 9.1 | 13.9 | 15.4 | 21.3 | 1.5 | 1.3 |
| MNRJ 29647 | 1 | 28.1 | 9.0 | 9.3 | 3.2 | 2.6 | 1.6 | 2.7 | 3.4 | 2.0 | 1.0 | 8.3 | 7.0 | 9.1 | 14.4 | 15.8 | 22.4 | 1.4 | 1.3 |
| MNRJ 29648 | 1 | 26.6 | 8.5 | 9.1 | 3.2 | 2.3 | 1.3 | 2.7 | 3.0 | 1.8 | 1.1 | 7.5 | 6.2 | 8.0 | 12.8 | 13.7 | 18.9 | 1.5 | 1.4 |
| MNRJ 29649 | 2 | 32.3 | 10.5 | 11.2 | 3.6 | 2.9 | 1.4 | 2.7 | 4.2 | 2.4 | 1.3 | 10.1 | 7.7 | 10.9 | 17.2 | 17.9 | 26.0 | 1.8 | 1.6 |
| MNRJ 30067 | 1 | 26.6 | 8.5 | 9.2 | 2.9 | 2.4 | 1.3 | 2.9 | 3.0 | 1.9 | 0.9 | 8.3 | 6.5 | 9.0 | 14.6 | 16.0 | 21.3 | 1.4 | 1.3 |
| MNRJ 30068 | 1 | 29.2 | 8.8 | 9.8 | 3.2 | 2.4 | 1.3 | 3.0 | 3.1 | 2.2 | 1.0 | 8.5 | 6.5 | 9.1 | 15.1 | 15.7 | 21.1 | 1.5 | 1.4 |
| MNRJ 30069 | 1 | 28.5 | 8.8 | 9.5 | 3.2 | 2.4 | 1.1 | 2.8 | 3.2 | 1.9 | 0.9 | 8.5 | 7.1 | 9.4 | 15.1 | 15.9 | 20.1 | 1.4 | 1.4 |
| MNRJ 30070 | 1 | 29.5 | 8.5 | 9.4 | 3.1 | 2.6 | 1.2 | 3.0 | 3.3 | 1.8 | 0.9 | 8.7 | 6.8 | 9.1 | 14.5 | 15.7 | 20.7 | 1.3 | 1.2 |
| MNRJ 30071 | 1 | 28.9 | 8.8 | 9.8 | 3.2 | 2.2 | 1.5 | 2.7 | 3.1 | 2.0 | 1.0 | 8.0 | 6.4 | 9.4 | 14.7 | 15.3 | 20.3 | 1.4 | 1.3 |
| MNRJ 30072 | 1 | 29.2 | 8.8 | 9.8 | 3.3 | 2.4 | 1.3 | 2.7 | 3.6 | 2.1 | 1.0 | 8.2 | 6.4 | 9.4 | 14.8 | 15.7 | 20.0 | 1.8 | 1.5 |
| MNRJ 30073 | 1 | 27.7 | 9.3 | 9.6 | 3.2 | 2.8 | 1.3 | 3.0 | 3.8 | 2.4 | 1.1 | 7.9 | 7.1 | 8.9 | 14.6 | 15.5 | 21.5 | 1.2 | 1.1 |
| MNRJ 30074 | 1 | 29.0 | 8.6 | 9.3 | 3.2 | 2.5 | 1.1 | 3.1 | 3.2 | 2.1 | 1.1 | 8.5 | 6.6 | 9.3 | 15.1 | 15.6 | 20.4 | 1.6 | 1.6 |
| MNRJ 30075 | 1 | 28.4 | 9.3 | 9.5 | 3.2 | 2.5 | 1.2 | 2.8 | 3.4 | 2.0 | 1.1 | 8.2 | 7.0 | 9.2 | 14.4 | 15.7 | 21.4 | 1.4 | 1.3 |
| MNRJ 30076 | 1 | 29.2 | 9.0 | 9.0 | 3.1 | 2.3 | 1.4 | 2.8 | 3.3 | 2.2 | 1.1 | 8.4 | 6.8 | 9.1 | 12.6 | 16.4 | 21.5 | 1.5 | 1.4 |
| MNRJ 30077 | 1 | 28.1 | 9.1 | 9.3 | 3.1 | 2.7 | 1.1 | 2.7 | 3.2 | 2.1 | 1.0 | 8.1 | 6.3 | 9.0 | 14.2 | 15.4 | 20.8 | 1.3 | 1.2 |
| MNRJ 30078 | 1 | 28.4 | 8.6 | 9.2 | 3.2 | 2.2 | 1.2 | 2.7 | 3.4 | 2.2 | 1.1 | 8.1 | 6.6 | 9.0 | 14.6 | 15.1 | 20.9 | 1.3 | 1.3 |
| MNRJ 30079 | 1 | 31.1 | 9.4 | 10.0 | 3.2 | 2.7 | 1.3 | 3.0 | 3.7 | 2.3 | 1.1 | 8.8 | 7.1 | 9.7 | 14.8 | 16.5 | 21.4 | 1.4 | 1.2 |
| MNRJ 30080 | 1 | 27.3 | 8.4 | 8.7 | 2.8 | 2.5 | 1.2 | 2.7 | 3.4 | 2.0 | 1.0 | 7.9 | 6.4 | 8.5 | 13.9 | 14.4 | 19.7 | 1.5 | 1.2 |
| MNRJ 29855 | 1 | 29.7 | 9.6 | 10.3 | 3.3 | 2.5 | 1.3 | 3.1 | 3.4 | 2.2 | 1.1 | 8.4 | 7.1 | 9.5 | 14.9 | 15.7 | 22.9 | 1.6 | 1.6 |
| MNRJ 29856 | 1 | 27.9 | 9.1 | 9.2 | 3.3 | 2.6 | 1.4 | 2.7 | 3.6 | 1.9 | 0.8 | 8.4 | 6.6 | 9.1 | 14.3 | 15.1 | 20.9 | 1.9 | 1.5 |
| MNRJ 29857 | 2 | 35.7 | 10.8 | 11.7 | 3.6 | 3.3 | 2.2 | 3.2 | 4.0 | 2.6 | 0.7 | 10.8 | 8.4 | 11.2 | 17.2 | 18.5 | 27.5 | 2.0 | 2.0 |
| MNRJ 29858 | 1 | 29.8 | 9.2 | 9.5 | 3.4 | 2.5 | 1.1 | 3.0 | 3.2 | 1.9 | 0.9 | 8.6 | 6.5 | 9.7 | 14.9 | 15.7 | 22.5 | 1.5 | 1.4 |
| MNRJ 29859 | 1 | 30.0 | 9.3 | 10.2 | 3.4 | 2.5 | 1.5 | 2.8 | 3.4 | 2.1 | 1.1 | 8.8 | 7.2 | 9.2 | 15.5 | 16.5 | 22.7 | 1.4 | 1.6 |
| MNRJ 29860 | 2 | 34.5 | 10.2 | 11.3 | 3.7 | 2.7 | 1.6 | 3.3 | 3.3 | 2.5 | 1.3 | 10.2 | 7.7 | 10.9 | 16.9 | 17.5 | 26.0 | 2.1 | 1.8 |
| MNRJ 29861 | 1 | 28.1 | 8.6 | 9.0 | 3.2 | 2.6 | 1.5 | 2.7 | 3.6 | 2.0 | 0.9 | 8.6 | 6.4 | 8.5 | 14.2 | 15.1 | 20.8 | 1.4 | 1.3 |
| MNRJ 29862 | 1 | 29.5 | 9.3 | 9.8 | 3.5 | 2.6 | 1.2 | 2.6 | 3.8 | 2.0 | 1.1 | 8.1 | 6.6 | 9.1 | 14.9 | 15.7 | 21.8 | 1.8 | 1.6 |
| MNRJ 29863 | 1 | 30.3 | 9.5 | 9.7 | 3.5 | 2.5 | 1.1 | 3.1 | 3.2 | 2.1 | 1.0 | 8.7 | 7.1 | 9.4 | 15.4 | 16.6 | 20.8 | 1.6 | 1.6 |
| MNRJ 29864 | 2 | 34.4 | 10.7 | 11.2 | 3.3 | 2.9 | 1.5 | 2.8 | 4.6 | 2.5 | 1.2 | 10.2 | 8.0 | 10.9 | 16.9 | 18.4 | 25.3 | 2.0 | 1.9 |
| MNRJ 29865 | 2 | 38.8 | 11.1 | 11.3 | 3.6 | 3.1 | 1.5 | 3.0 | 4.6 | 2.3 | 1.0 | 10.8 | 8.5 | 11.5 | 17.8 | 19.7 | 28.4 | 2.1 | 1.9 |
| MNRJ 29866 | 1 | 28.1 | 9.1 | 9.2 | 3.1 | 2.6 | 1.0 | 2.6 | 3.5 | 2.0 | 1.0 | 8.2 | 6.6 | 9.2 | 14.2 | 15.0 | 21.0 | 1.5 | 1.5 |
| MNRJ 29867 | 1 | 28.1 | 9.1 | 9.3 | 3.3 | 2.3 | 1.3 | 2.9 | 3.1 | 2.2 | 1.1 | 8.3 | 6.9 | 8.8 | 14.6 | 15.7 | 20.7 | 1.5 | 1.4 |
| MNRJ 29868 | 1 | 30.1 | 9.4 | 9.6 | 3.3 | 2.4 | 1.4 | 2.9 | 3.5 | 2.2 | 1.1 | 9.2 | 7.4 | 10.1 | 15.7 | 16.7 | 23.8 | 1.8 | 1.4 |
| MNRJ 29869 | 1 | 28.9 | 9.1 | 9.4 | 3.3 | 2.5 | 1.0 | 3.0 | 3.4 | 1.8 | 0.9 | 8.6 | 6.7 | 7.9 | 15.0 | 16.0 | 22.0 | 1.5 | 1.3 |
| MNRJ 29870 | 1 | 28.1 | 8.8 | 9.0 | 3.2 | 2.3 | 1.1 | 2.5 | 3.6 | 1.9 | 1.0 | 8.0 | 6.6 | 8.6 | 14.2 | 15.3 | 20.9 | 1.4 | 1.3 |
| MNRJ 29871 | 1 | 28.5 | 9.3 | 9.8 | 3.1 | 2.5 | 1.9 | 2.8 | 3.4 | 2.1 | 1.0 | 8.4 | 7.0 | 9.5 | 15.0 | 16.2 | 22.2 | 1.5 | 1.4 |
| MNRJ 29872 | 1 | 30.3 | 9.1 | 9.8 | 3.4 | 2.4 | 1.3 | 3.2 | 3.7 | 2.2 | 1.1 | 8.4 | 7.2 | 8.6 | 15.2 | 16.4 | 22.6 | 1.3 | 1.1 |
| MNRJ 29873 | 1 | 30.3 | 9.8 | 9.9 | 3.2 | 2.8 | 1.3 | 2.8 | 3.6 | 2.1 | 0.9 | 9.4 | 7.2 | 9.4 | 15.4 | 16.8 | 23.9 | 1.3 | 1.3 |
| MNRJ 29068 | 1 | 26.7 | 8.9 | 8.2 | 3.0 | 2.3 | 1.6 | 2.2 | 3.8 | 2.1 | 1.2 | 7.4 | 6.1 | 8.7 | 14.1 | 14.6 | 20.3 | 1.4 | 1.4 |
| MNRJ 29069 | 1 | 29.7 | 9.1 | 9.7 | 3.1 | 2.5 | 1.4 | 2.7 | 3.8 | 2.1 | 1.2 | 8.4 | 6.4 | 9.3 | 14.9 | 15.7 | 21.5 | 1.7 | 1.6 |
| MNRJ 29070 | 1 | 29.3 | 9.2 | 9.0 | 3.1 | 2.3 | 1.3 | 2.7 | 3.8 | 2.0 | 1.0 | 8.2 | 6.3 | 9.1 | 15.1 | 15.8 | 21.9 | 1.7 | 1.6 |
| MNRJ 29071 | 1 | 29.4 | 8.9 | 9.6 | 3.4 | 2.5 | 1.6 | 3.0 | 3.8 | 2.2 | 1.3 | 8.4 | 6.5 | 9.2 | 14.7 | 15.7 | 21.4 | 1.6 | 1.6 |
| MNRJ 29079 | 1 | 27.7 | 9.3 | 10.0 | 3.3 | 2.7 | 1.7 | 2.3 | 4.3 | 2.1 | 1.2 | 8.0 | 6.3 | 8.9 | 14.5 | 15.3 | 21.2 | 1.6 | 1.4 |
| MNRJ 43025 | 1 | 24.8 | 7.6 | 8.1 | 2.8 | 2.3 | 1.1 | 2.2 | 3.2 | 1.8 | 0.8 | 6.7 | 5.7 | 8.3 | 12.9 | 13.8 | 19.5 | 1.3 | 1.2 |
| MNRJ 43026 | 1 | 26.4 | 7.8 | 8.4 | 2.8 | 2.1 | 1.0 | 2.5 | 3.3 | 2.1 | 1.0 | 7.1 | 5.6 | 7.9 | 13.3 | 13.9 | 19.1 | 1.3 | 1.1 |
| MNRJ 43027 | 1 | 26.1 | 7.8 | 8.1 | 2.9 | 2.1 | 1.0 | 2.3 | 3.2 | 1.6 | 0.9 | 6.4 | 5.6 | 8.3 | 13.3 | 13.8 | 18.7 | 1.2 | 1.2 |
| MNRJ 43028 | 1 | 24.3 | 7.5 | 8.0 | 2.8 | 2.1 | 1.2 | 2.3 | 3.1 | 1.9 | 1.0 | 6.5 | 5.8 | 7.6 | 12.8 | 13.8 | 18.5 | 1.2 | 1.2 |
| MNRJ 43029 | 1 | 25.3 | 7.5 | 8.3 | 2.9 | 2.0 | 1.2 | 2.4 | 3.0 | 2.0 | 1.0 | 7.2 | 6.1 | 8.1 | 12.7 | 13.5 | 19.2 | 1.3 | 1.3 |
| MNRJ 43030 | 1 | 27.1 | 7.9 | 8.1 | 2.9 | 2.4 | 1.1 | 2.2 | 3.3 | 1.8 | 0.9 | 7.4 | 6.2 | 8.5 | 13.5 | 14.0 | 20.1 | 1.3 | 1.3 |
| MNRJ 43031 | 1 | 23.6 | 6.9 | 7.1 | 2.5 | 1.9 | 0.9 | 2.3 | 3.0 | 1.8 | 0.8 | 6.4 | 5.6 | 7.5 | 12.3 | 12.7 | 17.5 | 1.2 | 1.1 |
| MNRJ 43032 | 1 | 24.7 | 7.6 | 7.9 | 2.9 | 2.0 | 1.1 | 2.3 | 3.2 | 1.8 | 0.9 | 8.6 | 5.9 | 7.8 | 12.5 | 13.4 | 18.3 | 1.2 | 1.2 |
| MNRJ 43033 | 1 | 25.4 | 7.2 | 7.6 | 2.9 | 1.9 | 1.0 | 2.2 | 3.1 | 1.8 | 0.8 | 7.2 | 5.7 | 8.0 | 12.9 | 13.4 | 18.1 | 1.3 | 1.2 |
| MZUSP 77861 | 1 | 26.1 | 8.0 | 8.4 | 3.0 | 2.3 | 1.3 | 2.5 | 3.3 | 1.9 | 0.8 | 7.5 | 6.7 | 8.3 | 13.5 | 14.2 | 19.2 | 1.3 | 1.0 |
| MZUSP 3639 | 2 | 25.1 | 7.9 | 8.1 | 3.0 | 2.1 | 1.0 | 2.1 | 3.3 | 1.5 | 0.8 | 7.5 | 5.8 | 7.6 | 11.3 | 13.7 | 15.7 | 1.3 | 1.0 |
| MZUSP 3640 | 1 | 26.0 | 7.6 | 8.6 | 3.0 | 2.1 | 1.3 | 1.9 | 3.0 | 1.8 | 0.9 | 7.6 | 6.1 | 7.6 | 13.2 | 14.0 | 17.4 | 1.4 | 1.3 |
| MZUSP 3641 | 2 | 25.2 | 8.5 | 8.5 | 2.9 | 2.4 | 1.1 | 2.0 | 3.3 | 1.8 | 1.0 | 7.7 | 6.1 | 7.7 | 13.6 | 14.4 | 19.2 | 1.4 | 1.0 |
| MZUSP 118018 | 2 | 26.0 | 8.2 | 8.1 | 2.9 | 2.4 | 1.3 | 2.4 | 3.5 | 2.0 | 1.1 | 7.5 | 6.6 | 8.5 | 13.8 | 14.5 | 18.4 | 1.4 | 1.3 |
| MZUSP 118020 | 1 | 24.4 | 8.4 | 7.9 | 2.9 | 2.0 | 1.3 | 2.4 | 3.5 | 1.9 | 1.0 | 7.3 | 5.7 | 7.6 | 12.7 | 13.7 | 17.8 | 1.1 | 1.1 |
| MZUSP 118021 | 1 | 25.1 | 7.7 | 8.0 | 3.0 | 2.1 | 1.0 | 2.3 | 2.9 | 1.6 | 0.9 | 7.0 | 5.8 | 7.2 | 11.9 | 12.9 | 17.2 | 1.3 | 1.1 |
| MNRJ 42948 | 1 | 25.6 | 7.2 | 8.2 | 2.9 | 2.2 | 1.2 | 2.1 | 3.8 | 1.3 | 0.8 | 6.7 | 5.8 | 7.9 | 12.5 | 13.1 | 18.1 | 1.2 | 1.0 |
| MNRJ 42960 | 1 | 25.3 | 6.9 | 7.4 | 2.6 | 2.0 | 1.2 | 2.2 | 3.3 | 1.8 | 1.2 | 6.9 | 5.2 | 7.5 | 11.6 | 12.5 | 17.2 | 1.3 | 1.2 |
| MNRJ 42961 | 1 | 24.6 | 7.2 | 8.0 | 2.6 | 2.2 | 1.0 | 2.2 | 3.1 | 1.8 | 1.0 | 7.2 | 6.4 | 8.0 | 12.3 | 13.3 | 17.7 | 1.2 | 1.2 |
| MNRJ 42962 | 1 | 24.7 | 7.0 | 7.1 | 2.7 | 1.8 | 1.2 | 2.6 | 3.6 | 1.7 | 0.9 | 7.0 | 5.7 | 7.7 | 11.9 | 12.8 | 17.6 | 1.2 | 1.0 |
| MNRJ 42988 | 1 | 25.0 | 7.6 | 7.9 | 3.0 | 2.1 | 1.3 | 2.1 | 3.0 | 1.7 | 0.8 | 7.0 | 5.8 | 7.8 | 11.7 | 12.6 | 18.2 | 1.3 | 1.2 |
| MNRJ 42989 | 1 | 25.8 | 7.4 | 8.4 | 3.0 | 2.0 | 1.3 | 1.8 | 3.0 | 1.8 | 0.9 | 7.7 | 5.9 | 7.8 | 12.8 | 13.5 | 17.6 | 1.3 | 1.2 |
| MNRJ 40148 | 1 | 23.8 | 7.3 | 7.4 | 2.9 | 2.5 | 1.3 | 1.8 | 3.3 | 1.7 | 0.8 | 6.7 | 5.5 | 7.6 | 12.2 | 13.1 | 17.5 | 1.2 | 1.2 |
| MNRJ 36003 | 1 | 25.2 | 7.7 | 7.5 | 3.0 | 2.1 | 0.9 | 2.4 | 3.2 | 1.8 | 0.8 | 6.8 | 6.2 | 7.5 | 12.5 | 13.3 | 18.0 | 1.1 | 1.3 |
| MNRJ 36004 | 1 | 27.1 | 8.0 | 8.4 | 3.4 | 1.9 | 1.0 | 2.3 | 3.2 | 1.9 | 1.3 | 7.4 | 6.5 | 7.5 | 13.4 | 14.1 | 18.8 | 1.2 | 1.2 |
| MNRJ 36005 | 2 | 32.1 | 9.4 | 9.8 | 3.2 | 2.6 | 1.5 | 2.6 | 4.0 | 2.3 | 1.1 | 8.3 | 7.1 | 9.2 | 15.4 | 17.3 | 22.7 | 1.8 | 1.8 |
| MNRJ 36006 | 1 | 25.6 | 8.0 | 8.2 | 2.5 | 1.9 | 1.1 | 2.5 | 3.8 | 1.9 | 1.0 | 6.6 | 5.6 | 7.6 | 13.0 | 13.8 | 18.9 | 1.2 | 1.1 |
| MNRJ 36007 | 1 | 24.9 | 8.0 | 7.7 | 2.9 | 2.2 | 1.1 | 2.6 | 3.1 | 2.1 | 1.0 | 7.3 | 5.9 | 7.1 | 12.7 | 13.7 | 18.1 | 1.2 | 1.1 |
| MZUSP 118019 | 1 | 26.0 | 8.5 | 8.7 | 3.0 | 2.3 | 1.3 | 2.5 | 3.1 | 1.9 | 0.9 | 8.0 | 6.3 | 8.6 | 13.7 | 14.9 | 19.3 | 1.1 | 1.1 |
| MNRJ 37195 | 1 | 28.2 | 8.3 | 8.1 | 3.0 | 2.3 | 1.2 | 2.5 | 3.6 | 2.1 | 1.0 | 7.5 | 6.1 | 8.7 | 13.8 | 14.4 | 20.7 | 1.5 | 1.3 |
| MNRJ 37196 | 1 | 25.3 | 7.6 | 7.2 | 2.8 | 2.0 | 1.1 | 2.2 | 3.6 | 1.5 | 0.8 | 6.6 | 5.2 | 7.7 | 11.9 | 12.8 | 18.0 | 1.3 | 1.1 |
| MNRJ 37197 | 2 | 32.9 | 9.3 | 9.4 | 3.3 | 2.2 | 1.6 | 2.5 | 3.7 | 2.3 | 1.2 | 9.1 | 7.0 | 10.6 | 16.3 | 17.1 | 24.0 | 2.0 | 1.9 |
| MNRJ 37198 | 1 | 26.2 | 7.6 | 7.6 | 2.8 | 2.4 | 0.9 | 2.2 | 3.6 | 2.0 | 0.9 | 7.2 | 6.0 | 8.2 | 12.8 | 13.7 | 18.6 | 1.3 | 1.2 |
| MNRJ 37199 | 1 | 26.6 | 7.7 | 7.8 | 3.0 | 1.9 | 1.3 | 2.6 | 3.3 | 1.9 | 0.9 | 6.9 | 6.5 | 8.7 | 14.1 | 14.3 | 20.2 | 1.2 | 1.2 |
| MNRJ 37200 | 1 | 24.6 | 7.5 | 8.0 | 2.9 | 1.9 | 1.0 | 2.1 | 3.7 | 1.5 | 0.8 | 7.4 | 5.6 | 8.4 | 13.3 | 13.8 | 19.1 | 1.3 | 1.1 |
| MNRJ 37201 | 1 | 27.4 | 7.9 | 8.2 | 2.9 | 2.2 | 0.8 | 2.5 | 3.5 | 2.1 | 1.0 | 7.7 | 5.7 | 8.6 | 13.9 | 14.6 | 20.3 | 1.5 | 1.4 |
| MNRJ 37202 | 1 | 26.6 | 7.9 | 8.0 | 2.9 | 2.2 | 1.3 | 2.6 | 3.4 | 2.3 | 1.1 | 7.6 | 5.8 | 8.7 | 13.2 | 14.0 | 19.9 | 1.5 | 1.4 |
| MNRJ 50350 | 1 | 26.5 | 8.5 | 8.1 | 3.0 | 2.3 | 1.2 | 2.3 | 3.5 | 1.8 | 0.8 | 7.4 | 5.9 | 8.3 | 13.6 | 14.6 | 19.5 | 1.4 | 1.4 |
| MNRJ 50351 | 1 | 27.6 | 8.3 | 8.2 | 3.3 | 2.3 | 1.4 | 2.7 | 2.9 | 1.4 | 0.8 | 7.6 | 6.6 | 8.7 | 13.5 | 14.7 | 19.9 | 1.6 | 1.4 |
| MNRJ 31321 | 1 | 27.3 | 8.1 | 8.3 | 3.2 | 2.4 | 0.8 | 2.5 | 3.3 | 2.0 | 1.0 | 7.6 | 5.7 | 8.2 | 12.9 | 13.7 | 18.7 | 1.4 | 1.3 |
| MNRJ 31322 | 1 | 27.9 | 8.2 | 8.9 | 3.4 | 2.2 | 1.2 | 2.5 | 3.9 | 2.2 | 1.1 | 7.6 | 6.1 | 8.1 | 14.1 | 15.3 | 19.6 | 1.3 | 1.2 |
| MNRJ 31323 | 1 | 27.6 | 8.4 | 8.7 | 3.6 | 2.4 | 1.1 | 2.8 | 3.7 | 1.9 | 1.0 | 8.2 | 5.9 | 8.9 | 14.1 | 15.3 | 20.1 | 1.3 | 1.3 |
| MNRJ 31324 | 1 | 27.0 | 8.5 | 8.9 | 3.2 | 2.4 | 1.0 | 2.7 | 3.9 | 1.9 | 1.1 | 8.6 | 6.0 | 8.7 | 14.1 | 15.5 | 21.6 | 1.5 | 1.4 |
| MNRJ 31325 | 1 | 24.6 | 8.2 | 8.2 | 3.2 | 2.1 | 1.1 | 2.6 | 3.2 | 1.9 | 1.1 | 7.8 | 5.9 | 8.3 | 13.7 | 14.4 | 19.5 | 1.4 | 1.3 |
| MNRJ 31326 | 1 | 27.7 | 8.1 | 8.4 | 3.3 | 2.5 | 1.0 | 2.5 | 3.6 | 2.1 | 1.0 | 7.2 | 5.6 | 8.4 | 13.6 | 14.4 | 19.6 | 1.4 | 1.3 |
| MNRJ 31327 | 1 | 26.6 | 7.9 | 8.3 | 3.4 | 2.2 | 1.2 | 2.6 | 3.2 | 1.8 | 0.9 | 7.3 | 5.4 | 8.7 | 13.0 | 14.4 | 18.9 | 1.2 | 1.1 |
| UFBA 8921 | 1 | 29.2 | 8.8 | 9.6 | 3.0 | 2.4 | 1.4 | 2.9 | 3.6 | 2.1 | 0.9 | 8.6 | 6.6 | 8.9 | 14.0 | 16.0 | 20.5 | 1.6 | 1.5 |
| UFBA 8922 | 1 | 28.9 | 8.7 | 9.4 | 3.0 | 2.7 | 1.3 | 2.4 | 3.9 | 2.2 | 0.9 | 8.2 | 5.9 | 8.6 | 14.5 | 15.0 | 19.7 | 1.5 | 1.5 |
| UFBA 8923 | 1 | 29.7 | 8.8 | 9.1 | 3.1 | 2.4 | 1.5 | 2.6 | 3.5 | 1.9 | 0.9 | 8.2 | 6.2 | 8.9 | 14.1 | 16.2 | 20.3 | 1.5 | 1.3 |
| UFBA 8924 | 1 | 28.4 | 8.8 | 9.0 | 3.1 | 2.6 | 1.2 | 2.4 | 3.9 | 2.0 | 0.8 | 8.4 | 6.9 | 8.5 | 13.9 | 15.4 | 20.0 | 1.5 | 1.4 |
| UFBA 8925 | 1 | 27.4 | 8.8 | 8.9 | 3.0 | 2.4 | 1.3 | 2.4 | 4.1 | 2.0 | 0.9 | 8.4 | 6.5 | 9.4 | 14.3 | 15.7 | 20.6 | 1.3 | 1.3 |
| UFBA 8926 | 1 | 27.5 | 8.7 | 9.0 | 2.9 | 2.3 | 1.3 | 2.5 | 3.7 | 2.2 | 1.0 | 7.8 | 6.2 | 8.7 | 13.6 | 14.8 | 20.3 | 1.5 | 1.3 |
| MNRJ 47400 | 2 | 29.8 | 8.2 | 8.7 | 3.4 | 2.2 | 1.3 | 2.9 | 3.2 | 1.8 | 1.0 | 7.8 | 6.8 | 8.6 | 14.7 | 15.0 | 21.1 | 1.5 | 1.3 |
| MNRJ 47401 | 1 | 26.1 | 7.8 | 8.0 | 3.1 | 1.9 | 1.1 | 3.0 | 2.9 | 1.6 | 0.8 | 6.8 | 5.9 | 8.4 | 13.5 | 14.1 | 19.5 | 1.4 | 1.2 |
| MNRJ 47402 | 1 | 27.4 | 8.6 | 8.7 | 3.3 | 2.3 | 1.5 | 2.9 | 3.2 | 1.8 | 0.9 | 7.8 | 6.3 | 8.7 | 14.1 | 14.8 | 20.5 | 1.3 | 1.2 |
| MNRJ 47403 | 1 | 28.0 | 8.4 | 8.5 | 2.9 | 2.1 | 1.3 | 2.9 | 3.0 | 1.9 | 0.9 | 7.9 | 6.2 | 9.5 | 14.3 | 15.2 | 21.4 | 1.4 | 1.2 |
| MNRJ 47404 | 1 | 27.3 | 8.2 | 8.6 | 3.2 | 2.1 | 1.4 | 2.7 | 2.8 | 1.8 | 1.0 | 7.3 | 5.9 | 8.4 | 13.8 | 14.3 | 18.9 | 1.4 | 1.3 |
| MNRJ 47405 | 1 | 28.2 | 7.9 | 8.9 | 3.4 | 2.2 | 1.1 | 3.2 | 2.7 | 1.8 | 0.8 | 7.9 | 6.7 | 8.6 | 14.3 | 15.2 | 21.2 | 1.3 | 1.3 |
| MNRJ 47406 | 1 | 28.8 | 8.7 | 8.6 | 3.4 | 2.4 | 1.2 | 2.9 | 2.7 | 1.8 | 1.0 | 7.7 | 6.3 | 8.7 | 14.0 | 14.7 | 20.9 | 1.6 | 1.4 |
| MNRJ 47407 | 1 | 27.7 | 8.4 | 8.6 | 3.3 | 2.2 | 1.3 | 2.9 | 2.9 | 1.9 | 1.0 | 7.9 | 6.4 | 8.6 | 13.5 | 14.5 | 20.6 | 1.5 | 1.4 |
| MNRJ 47408 | 1 | 26.2 | 7.5 | 7.8 | 3.2 | 2.1 | 1.3 | 2.9 | 2.9 | 1.8 | 0.9 | 7.5 | 6.0 | 8.0 | 13.3 | 14.1 | 20.1 | 1.5 | 1.3 |
| MNRJ 47409 | 1 | 28.6 | 8.2 | 8.6 | 3.2 | 2.2 | 1.2 | 2.8 | 3.4 | 1.8 | 0.9 | 7.1 | 6.3 | 8.7 | 14.6 | 15.0 | 21.0 | 1.4 | 1.3 |
| MNRJ 47410 | 1 | 27.2 | 8.1 | 8.2 | 3.1 | 2.1 | 1.3 | 2.5 | 3.1 | 1.9 | 1.0 | 7.6 | 6.1 | 8.2 | 13.0 | 13.8 | 19.2 | 1.4 | 1.3 |
| MNRJ 47411 | 1 | 27.2 | 8.1 | 8.9 | 3.4 | 1.9 | 1.3 | 2.9 | 3.1 | 1.6 | 0.8 | 7.7 | 6.4 | 8.7 | 13.9 | 14.8 | 19.8 | 1.3 | 1.3 |
| MNRJ 47412 | 1 | 26.9 | 8.0 | 8.2 | 3.3 | 2.2 | 1.3 | 3.1 | 2.8 | 1.5 | 0.9 | 7.1 | 6.1 | 8.6 | 13.6 | 13.9 | 19.2 | 1.4 | 1.4 |
| MNRJ 47413 | 1 | 27.6 | 8.1 | 8.4 | 3.2 | 2.3 | 1.4 | 2.7 | 3.1 | 2.1 | 1.0 | 7.4 | 6.0 | 8.6 | 13.7 | 13.9 | 19.5 | 1.4 | 1.2 |
| MNRJ 37345 | 1 | 26.1 | 8.1 | 8.3 | 3.2 | 2.3 | 1.3 | 2.7 | 3.1 | 1.9 | 1.0 | 7.9 | 6.5 | 8.0 | 14.1 | 14.4 | 20.6 | 1.4 | 1.3 |
| MNRJ 37346 | 1 | 26.8 | 7.7 | 8.2 | 3.2 | 2.1 | 1.0 | 2.7 | 3.1 | 1.8 | 0.8 | 7.2 | 6.1 | 7.7 | 13.5 | 14.1 | 18.8 | 1.5 | 1.3 |
| MNRJ 37347 | 1 | 27.4 | 8.0 | 7.9 | 3.3 | 2.4 | 1.2 | 2.6 | 2.9 | 1.9 | 1.0 | 7.9 | 6.5 | 8.4 | 14.3 | 14.8 | 20.1 | 1.4 | 1.4 |
| MNRJ 37348 | 1 | 26.8 | 7.8 | 8.2 | 3.1 | 2.3 | 1.2 | 2.5 | 3.1 | 1.9 | 1.0 | 7.7 | 6.2 | 7.8 | 13.8 | 14.6 | 19.9 | 1.2 | 1.3 |
| MNRJ 37349 | 1 | 26.6 | 8.3 | 8.5 | 3.1 | 2.2 | 1.1 | 1.4 | 3.3 | 1.9 | 0.8 | 7.6 | 5.8 | 7.9 | 13.7 | 14.0 | 19.0 | 1.3 | 1.3 |
| MNRJ 37350 | 1 | 28.0 | 8.4 | 8.7 | 3.2 | 2.2 | 1.3 | 3.0 | 2.9 | 2.0 | 0.9 | 7.3 | 6.3 | 8.4 | 14.7 | 14.9 | 20.4 | 1.4 | 1.4 |
| MNRJ 37351 | 1 | 26.8 | 8.1 | 8.0 | 3.1 | 2.3 | 1.2 | 3.1 | 3.2 | 1.8 | 0.9 | 7.3 | 6.0 | 7.7 | 13.3 | 14.1 | 19.6 | 1.3 | 1.4 |
| MNRJ 37352 | 1 | 28.0 | 8.7 | 9.0 | 3.3 | 2.3 | 1.2 | 2.6 | 3.4 | 2.0 | 0.9 | 8.0 | 6.2 | 8.7 | 14.8 | 15.4 | 20.5 | 1.3 | 1.3 |
| MNRJ 43999 | 1 | 28.2 | 8.7 | 8.5 | 3.1 | 2.3 | 1.3 | 2.5 | 3.8 | 1.7 | 0.8 | 7.7 | 6.1 | 7.8 | 13.8 | 14.6 | 19.8 | 1.3 | 1.4 |
| MNRJ 47806 | 1 | 24.3 | 7.6 | 7.4 | 2.5 | 2.3 | 1.1 | 2.1 | 3.2 | 1.8 | 0.9 | 7.0 | 5.3 | 7.3 | 11.7 | 12.8 | 18.1 | 1.1 | 1.1 |
| MNRJ 47807 | 1 | 27.2 | 8.1 | 8.4 | 2.9 | 2.3 | 1.3 | 2.5 | 3.3 | 2.1 | 1.0 | 7.5 | 6.5 | 7.6 | 12.9 | 14.1 | 19.8 | 1.3 | 1.3 |
| MNRJ 47808 | 1 | 27.7 | 8.2 | 8.5 | 2.9 | 2.4 | 1.1 | 2.4 | 3.5 | 2.0 | 1.0 | 6.7 | 6.1 | 8.6 | 13.8 | 15.3 | 20.1 | 1.5 | 1.3 |
| MNRJ 47809 | 1 | 22.7 | 6.8 | 7.6 | 2.6 | 2.2 | 1.2 | 2.1 | 3.5 | 1.8 | 1.0 | 6.5 | 6.1 | 7.1 | 12.0 | 12.9 | 17.5 | 1.3 | 1.1 |
| MNRJ 47810 | 1 | 25.8 | 8.1 | 8.6 | 2.9 | 2.4 | 1.1 | 2.5 | 3.5 | 1.9 | 1.0 | 7.2 | 6.6 | 7.8 | 12.8 | 14.0 | 19.8 | 1.4 | 1.1 |
| MNRJ 47268 | 1 | 28.2 | 8.6 | 8.6 | 3.5 | 2.4 | 1.4 | 2.4 | 3.4 | 1.9 | 0.8 | 7.8 | 6.4 | 8.7 | 14.0 | 14.8 | 20.0 | 1.6 | 1.4 |
| MNRJ 47269 | 1 | 27.9 | 8.8 | 8.6 | 3.3 | 2.3 | 1.2 | 2.6 | 3.5 | 1.3 | 0.7 | 7.2 | 6.6 | 8.6 | 13.6 | 14.3 | 20.1 | 1.5 | 1.3 |
| MNRJ 47270 | 1 | 26.5 | 7.7 | 8.0 | 3.0 | 2.0 | 1.3 | 2.5 | 3.1 | 1.8 | 0.9 | 6.8 | 5.4 | 8.3 | 12.9 | 13.3 | 18.5 | 1.4 | 1.2 |
| MNRJ 47271 | 1 | 28.4 | 8.8 | 8.6 | 3.3 | 2.2 | 1.5 | 2.7 | 3.4 | 1.9 | 1.0 | 7.2 | 6.0 | 8.3 | 14.0 | 14.4 | 20.4 | 1.5 | 1.4 |
| MNRJ 47272 | 1 | 28.5 | 8.2 | 8.7 | 3.4 | 2.4 | 1.4 | 2.8 | 3.5 | 2.1 | 1.0 | 7.6 | 6.0 | 8.7 | 14.8 | 15.2 | 21.0 | 1.4 | 1.3 |
| MNRJ 38198 | 1 | 24.8 | 7.8 | 8.1 | 3.0 | 2.3 | 1.3 | 2.1 | 3.4 | 1.6 | 0.8 | 7.3 | 5.9 | 7.7 | 12.3 | 14.0 | 18.5 | 1.0 | 1.0 |
| MNRJ 37339 | 2 | 34.4 | 10.3 | 10.4 | 3.1 | 2.5 | 1.6 | 2.9 | 3.6 | 2.1 | 1.0 | 9.9 | 7.2 | 10.7 | 16.7 | 18.8 | 25.6 | 1.8 | 1.7 |
| MNRJ 37340 | 1 | 29.8 | 9.3 | 9.3 | 3.4 | 2.2 | 1.3 | 2.6 | 3.5 | 2.0 | 1.0 | 8.2 | 6.6 | 8.6 | 13.9 | 14.6 | 20.2 | 1.4 | 1.3 |
| MNRJ 39505 | 2 | 33.6 | 10.1 | 9.9 | 3.5 | 2.9 | 2.0 | 2.7 | 4.2 | 2.2 | 1.2 | 9.4 | 6.9 | 10.3 | 17.2 | 18.4 | 25.0 | 1.6 | 1.6 |
| MNRJ 27870 | 1 | 27.7 | 8.4 | 8.7 | 3.3 | 2.4 | 1.3 | 2.6 | 3.2 | 2.0 | 1.0 | 8.2 | 6.2 | 8.3 | 13.2 | 15.2 | 20.4 | 1.4 | 1.2 |
| MNRJ 27871 | 1 | 25.2 | 8.1 | 8.1 | 3.1 | 2.4 | 0.8 | 2.5 | 3.3 | 2.1 | 1.1 | 7.6 | 5.6 | 8.5 | 13.1 | 14.4 | 19.4 | 1.6 | 1.4 |
| MNRJ 27872 | 1 | 25.7 | 7.6 | 7.9 | 3.1 | 2.2 | 1.0 | 2.6 | 3.1 | 1.5 | 1.0 | 7.3 | 5.7 | 7.7 | 12.5 | 14.1 | 18.3 | 1.3 | 1.2 |
| MNRJ 27873 | 1 | 25.1 | 7.3 | 7.6 | 3.1 | 2.1 | 1.1 | 2.4 | 2.8 | 1.6 | 1.0 | 7.3 | 5.4 | 7.9 | 12.5 | 13.8 | 19.0 | 1.2 | 1.1 |
| MNRJ 27874 | 1 | 28.1 | 8.1 | 8.5 | 3.1 | 2.4 | 1.1 | 2.6 | 3.4 | 2.0 | 1.0 | 7.9 | 5.9 | 7.9 | 13.2 | 14.7 | 19.7 | 1.2 | 1.2 |
| MNRJ 27881 | 1 | 26.5 | 8.5 | 8.2 | 2.9 | 2.4 | 1.1 | 2.5 | 3.6 | 2.9 | 0.9 | 7.3 | 6.3 | 8.2 | 13.1 | 13.4 | 19.4 | 1.3 | 1.2 |
| MNRJ 27882 | 1 | 27.6 | 8.7 | 9.1 | 3.3 | 2.3 | 1.2 | 2.7 | 3.3 | 2.1 | 1.0 | 8.0 | 6.3 | 8.9 | 14.1 | 14.8 | 20.5 | 1.4 | 1.4 |
| MNRJ 27884 | 1 | 27.4 | 8.4 | 9.0 | 3.0 | 2.4 | 1.0 | 2.3 | 3.4 | 2.0 | 1.0 | 7.6 | 5.8 | 7.9 | 13.8 | 13.9 | 18.8 | 1.2 | 1.1 |
| MNRJ 27885 | 2 | 33.2 | 9.7 | 10.1 | 3.5 | 2.6 | 1.2 | 2.8 | 3.4 | 2.3 | 1.3 | 9.2 | 7.3 | 9.5 | 16.5 | 17.2 | 23.5 | 1.6 | 1.5 |
| MNRJ 28430 | 1 | 28.1 | 8.6 | 8.1 | 3.1 | 2.2 | 1.3 | 2.7 | 3.1 | 1.8 | 1.0 | 8.0 | 6.0 | 8.8 | 13.8 | 14.5 | 20.9 | 1.6 | 1.4 |
| MNRJ 22807 | 1 | 30.5 | 9.4 | 9.7 | 3.4 | 2.6 | 1.4 | 2.8 | 3.5 | 2.3 | 1.2 | 9.0 | 6.6 | 9.9 | 15.5 | 16.4 | 23.7 | 2.1 | 1.8 |
| MNRJ 22808 | 1 | 29.4 | 8.5 | 9.3 | 3.3 | 2.5 | 1.0 | 2.7 | 3.9 | 2.1 | 0.9 | 8.8 | 6.6 | 9.3 | 15.0 | 15.5 | 20.3 | 1.8 | 1.6 |
| MNRJ 22809 | 1 | 30.0 | 9.6 | 9.2 | 3.3 | 2.7 | 1.1 | 2.8 | 3.9 | 2.3 | 1.0 | 8.7 | 6.3 | 10.0 | 15.2 | 16.1 | 22.0 | 1.8 | 1.6 |
| MNRJ 16866 | 1 | 30.0 | 9.5 | 9.4 | 3.4 | 2.7 | 1.5 | 2.7 | 3.5 | 1.8 | 1.0 | 8.5 | 6.1 | 9.1 | 15.2 | 15.8 | 22.4 | 1.6 | 1.4 |
| MNRJ 16867 | 1 | 29.3 | 8.8 | 9.0 | 3.1 | 2.4 | 1.2 | 2.4 | 3.6 | 1.9 | 0.9 | 8.7 | 7.3 | 8.6 | 15.0 | 15.8 | 21.0 | 1.4 | 1.3 |
| MNRJ 16868 | 1 | 28.3 | 8.9 | 8.4 | 3.0 | 2.6 | 1.3 | 2.7 | 3.2 | 2.1 | 0.9 | 8.0 | 6.0 | 7.9 | 13.9 | 14.5 | 20.4 | 1.2 | 1.3 |
| MNRJ 16869 | 1 | 28.0 | 8.3 | 8.6 | 2.8 | 2.5 | 1.3 | 2.0 | 3.5 | 2.0 | 1.0 | 7.9 | 6.9 | 8.1 | 14.1 | 14.6 | 20.2 | 1.4 | 1.2 |
| MNRJ 16870 | 2 | 30.4 | 9.3 | 9.8 | 3.2 | 2.6 | 1.3 | 2.5 | 3.6 | 2.6 | 1.2 | 9.0 | 7.4 | 9.5 | 16.3 | 17.4 | 22.8 | 1.4 | 1.3 |
| MNRJ 7915 | 1 | 30.4 | 9.6 | 9.5 | 3.5 | 2.6 | 1.3 | 2.2 | 4.6 | 2.1 | 1.0 | 8.7 | 6.7 | 9.5 | 15.5 | 16.9 | 22.6 | 1.6 | 1.4 |
| MNRJ 7916 | 1 | 32.6 | 10.0 | 10.3 | 4.0 | 2.7 | 1.6 | 2.6 | 4.4 | 2.2 | 1.2 | 8.7 | 6.8 | 9.9 | 15.2 | 17.8 | 22.3 | 1.6 | 1.6 |
| MNRJ 3850 | 1 | 31.5 | 9.6 | 9.2 | 3.5 | 2.7 | 1.4 | 2.3 | 4.4 | 2.2 | 0.9 | 8.6 | 6.6 | 9.7 | 15.8 | 17.2 | 23.1 | 1.7 | 1.4 |
| MNRJ 37446 | 2 | 30.3 | 9.5 | 9.8 | 3.6 | 2.6 | 1.4 | 2.5 | 3.8 | 2.1 | 1.2 | 8.3 | 6.6 | 9.2 | 15.1 | 16.5 | 21.5 | 1.4 | 1.3 |
| MNRJ 37447 | 2 | 32.2 | 10.4 | 10.3 | 3.5 | 2.6 | 1.3 | 2.9 | 4.0 | 2.1 | 0.9 | 8.9 | 6.3 | 9.8 | 15.7 | 15.9 | 23.6 | 1.7 | 1.7 |
| MNRJ 36057 | 2 | 30.2 | 10.5 | 10.4 | 3.6 | 2.9 | 1.6 | 2.1 | 4.8 | 2.1 | 1.2 | 9.2 | 6.9 | 9.7 | 14.4 | 18.0 | 23.7 | 1.3 | 1.3 |
| MNRJ 36058 | 2 | 30.4 | 9.7 | 9.6 | 3.6 | 2.9 | 1.4 | 2.6 | 4.0 | 2.1 | 1.0 | 9.0 | 7.1 | 9.2 | 14.4 | 17.0 | 22.7 | 1.3 | 1.2 |
| MNRJ 40874 | 1 | 27.7 | 8.9 | 9.0 | 3.3 | 2.6 | 1.6 | 2.5 | 3.8 | 2.2 | 1.0 | 8.1 | 6.6 | 8.7 | 14.6 | 15.7 | 21.0 | 1.3 | 1.3 |
| MNRJ 40875 | 1 | 25.2 | 8.1 | 8.0 | 3.1 | 2.3 | 1.2 | 2.1 | 3.4 | 1.8 | 0.9 | 7.7 | 6.0 | 7.6 | 13.2 | 14.0 | 19.4 | 1.2 | 1.2 |
| MNRJ 49624 | 2 | 23.3 | 6.9 | 7.6 | 2.6 | 2.2 | 1.0 | 2.3 | 3.4 | 1.8 | 0.8 | 6.6 | 5.2 | 7.1 | 11.7 | 12.3 | 17.7 | 1.1 | 1.0 |
| MNRJ 49625 | 2 | 24.1 | 5.6 | 7.4 | 2.7 | 2.3 | 0.9 | 2.2 | 3.5 | 2.0 | 1.0 | 7.7 | 5.5 | 7.7 | 12.6 | 13.3 | 18.6 | 1.2 | 1.1 |
| MNRJ 49626 | 2 | 30.0 | 8.6 | 8.9 | 2.9 | 2.6 | 1.2 | 2.4 | 3.7 | 2.0 | 1.0 | 8.6 | 6.6 | 9.5 | 15.8 | 16.6 | 23.6 | 1.4 | 1.4 |
| MNRJ 49627 | 2 | 28.0 | 8.5 | 8.6 | 3.0 | 2.4 | 1.3 | 2.6 | 3.7 | 2.3 | 1.1 | 8.4 | 6.3 | 9.5 | 15.4 | 15.9 | 22.5 | 1.6 | 1.5 |
| MNRJ 49628 | 2 | 27.0 | 7.9 | 8.3 | 2.7 | 2.4 | 1.1 | 2.7 | 3.3 | 2.0 | 1.0 | 9.1 | 5.7 | 9.2 | 14.1 | 15.0 | 20.9 | 1.4 | 1.3 |
| MNRJ 49629 | 2 | 28.3 | 8.2 | 8.4 | 3.0 | 2.6 | 1.3 | 2.3 | 3.6 | 2.0 | 1.0 | 8.1 | 6.6 | 9.5 | 14.8 | 16.4 | 23.0 | 1.6 | 1.5 |
| MNRJ 49630 | 2 | 23.5 | 6.8 | 7.6 | 2.7 | 2.3 | 0.8 | 2.4 | 3.2 | 1.8 | 1.1 | 7.6 | 5.5 | 7.5 | 11.7 | 12.7 | 17.2 | 1.1 | 1.1 |
| MNRJ 49731 | 2 | 26.7 | 8.7 | 8.7 | 2.9 | 2.4 | 1.0 | 2.5 | 3.7 | 2.2 | 1.1 | 7.9 | 6.4 | 8.6 | 13.4 | 14.5 | 20.3 | 1.3 | 1.2 |
| MNRJ 38426 | 1 | 26.2 | 8.1 | 8.4 | 2.9 | 2.3 | 1.2 | 2.7 | 3.4 | 2.0 | 1.1 | 7.4 | 6.0 | 7.8 | 13.8 | 13.8 | 19.8 | 1.4 | 1.3 |
| MNRJ 38427 | 1 | 27.2 | 8.2 | 8.3 | 3.3 | 2.2 | 1.1 | 2.6 | 3.7 | 1.8 | 0.9 | 7.5 | 6.2 | 7.7 | 13.9 | 14.3 | 19.8 | 1.5 | 1.4 |
| MNRJ 28333 | 1 | 25.7 | 8.4 | 8.0 | 3.0 | 2.3 | 1.3 | 2.1 | 3.3 | 1.8 | 0.9 | 7.7 | 6.2 | 8.7 | 13.5 | 14.4 | 19.2 | 1.6 | 1.4 |
| MNRJ 28334 | 1 | 28.7 | 8.9 | 8.7 | 3.4 | 2.3 | 1.3 | 2.3 | 3.9 | 1.8 | 1.0 | 8.0 | 6.1 | 9.0 | 14.9 | 14.8 | 20.5 | 1.4 | 1.4 |
| MNRJ 28335 | 1 | 27.6 | 8.5 | 8.6 | 3.1 | 2.3 | 1.3 | 2.6 | 3.5 | 2.1 | 1.2 | 7.6 | 6.2 | 8.4 | 13.2 | 14.1 | 19.2 | 1.4 | 1.3 |
| MNRJ 30443 | 1 | 25.1 | 8.0 | 8.6 | 3.0 | 2.3 | 1.2 | 2.5 | 4.0 | 2.0 | 1.0 | 7.4 | 5.5 | 8.2 | 12.9 | 13.4 | 18.4 | 1.4 | 1.4 |
| MNRJ 30444 | 1 | 26.3 | 8.0 | 8.4 | 2.9 | 2.5 | 1.6 | 2.0 | 3.1 | 2.1 | 1.2 | 7.6 | 5.9 | 8.5 | 13.1 | 14.0 | 19.8 | 1.6 | 1.6 |
| MNRJ 30037 | 2 | 34.4 | 10.9 | 11.0 | 3.9 | 3.1 | 1.7 | 2.9 | 4.6 | 2.1 | 1.0 | 9.4 | 7.5 | 9.9 | 16.8 | 17.3 | 24.2 | 2.0 | 1.7 |
| MNRJ 40684 | 1 | 28.5 | 8.9 | 9.2 | 3.1 | 2.3 | 1.6 | 2.3 | 3.1 | 2.0 | 0.9 | 7.8 | 6.0 | 8.3 | 13.7 | 14.1 | 19.7 | 1.6 | 1.7 |
| MNRJ 40685 | 1 | 24.9 | 7.8 | 8.1 | 2.7 | 2.3 | 1.3 | 2.5 | 3.5 | 1.8 | 1.0 | 7.5 | 5.7 | 7.9 | 13.2 | 13.5 | 18.9 | 1.3 | 1.4 |
| MNRJ 40686 | 1 | 27.8 | 8.6 | 9.0 | 3.1 | 2.3 | 1.3 | 2.5 | 3.9 | 2.2 | 1.0 | 7.7 | 6.2 | 8.6 | 13.5 | 14.2 | 20.0 | 1.4 | 1.3 |
| MNRJ 56051 | 1 | 28.1 | 8.5 | 9.1 | 3.1 | 2.6 | 2.0 | 2.3 | 3.8 | 2.0 | 0.9 | 8.1 | 6.6 | 8.5 | 13.9 | 14.9 | 19.9 | 1.4 | 1.4 |
| MNRJ 56052 | 1 | 26.5 | 8.1 | 8.8 | 3.1 | 2.2 | 1.4 | 2.0 | 3.6 | 1.8 | 0.9 | 6.5 | 6.1 | 8.0 | 12.4 | 13.2 | 18.4 | 1.3 | 1.0 |
| MNRJ 56053 | 1 | 27.7 | 8.1 | 8.9 | 3.1 | 2.3 | 1.3 | 2.5 | 3.1 | 2.0 | 0.9 | 7.8 | 6.5 | 8.6 | 13.9 | 14.5 | 19.1 | 1.3 | 1.2 |
| MNRJ 56054 | 1 | 27.7 | 8.2 | 8.6 | 3.3 | 2.2 | 1.6 | 2.6 | 3.3 | 2.0 | 0.9 | 7.4 | 6.0 | 8.3 | 13.8 | 14.4 | 20.2 | 1.4 | 1.3 |
| MNRJ 56055 | 1 | 27.3 | 7.7 | 8.8 | 3.0 | 2.2 | 1.3 | 2.3 | 3.5 | 1.8 | 0.9 | 7.1 | 6.5 | 8.4 | 13.5 | 13.9 | 19.3 | 1.3 | 1.0 |
| MNRJ 56056 | 1 | 27.7 | 8.4 | 8.8 | 3.1 | 2.3 | 1.6 | 2.3 | 3.5 | 2.0 | 1.0 | 7.7 | 6.6 | 8.6 | 13.7 | 14.7 | 20.0 | 1.4 | 1.3 |
| MNRJ 40480 | 1 | 26.5 | 8.3 | 8.2 | 3.0 | 2.0 | 1.3 | 2.6 | 3.7 | 1.6 | 0.8 | 7.7 | 5.7 | 8.2 | 13.1 | 14.4 | 18.6 | 1.5 | 1.4 |
| MNRJ 40481 | 1 | 25.2 | 7.1 | 7.8 | 2.9 | 2.3 | 1.3 | 2.4 | 3.7 | 1.8 | 0.9 | 7.4 | 5.5 | 8.0 | 12.2 | 13.9 | 18.9 | 1.3 | 1.3 |
| MNRJ 42606 | 1 | 27.2 | 8.6 | 8.9 | 3.1 | 2.5 | 1.2 | 2.6 | 3.6 | 2.0 | 1.0 | 7.9 | 5.9 | 8.6 | 14.2 | 15.1 | 20.5 | 1.4 | 1.2 |
| MNRJ 42607 | 1 | 24.8 | 8.0 | 8.2 | 2.7 | 2.5 | 0.8 | 2.4 | 3.4 | 1.8 | 1.0 | 7.4 | 5.6 | 7.7 | 12.5 | 13.5 | 18.9 | 1.3 | 1.1 |
| MNRJ 42608 | 2 | 35.6 | 10.4 | 10.6 | 3.3 | 2.9 | 1.8 | 3.2 | 3.9 | 2.5 | 1.2 | 9.7 | 7.9 | 11.4 | 18.1 | 18.6 | 25.6 | 1.9 | 1.6 |
| MNRJ 42609 | 1 | 27.6 | 8.4 | 8.8 | 3.3 | 2.2 | 1.2 | 3.0 | 3.4 | 2.0 | 1.0 | 8.2 | 6.5 | 9.5 | 15.0 | 15.7 | 22.3 | 1.5 | 1.5 |
| MNRJ 42610 | 1 | 28.7 | 8.8 | 8.9 | 3.1 | 2.7 | 1.2 | 2.8 | 3.5 | 2.1 | 1.0 | 8.1 | 6.8 | 8.9 | 15.0 | 16.2 | 21.8 | 1.3 | 1.2 |
| MNRJ 42611 | 1 | 27.1 | 8.3 | 8.5 | 3.1 | 2.4 | 1.1 | 2.6 | 3.4 | 2.0 | 1.0 | 8.1 | 6.1 | 8.7 | 14.1 | 14.9 | 20.0 | 1.4 | 1.4 |
| MNRJ 25614 | 1 | 25.7 | 7.8 | 8.5 | 2.8 | 2.3 | 1.1 | 2.3 | 3.5 | 1.8 | 0.8 | 7.8 | 5.8 | 8.4 | 14.0 | 14.4 | 19.8 | 1.2 | 1.1 |
| MNRJ 25615 | 1 | 25.6 | 7.9 | 8.2 | 3.0 | 2.3 | 1.2 | 2.6 | 3.0 | 1.8 | 0.9 | 7.7 | 6.0 | 8.3 | 14.2 | 15.1 | 20.0 | 1.2 | 1.1 |
| MNRJ 25616 | 1 | 26.2 | 8.3 | 9.1 | 2.8 | 2.5 | 1.3 | 2.3 | 4.2 | 2.2 | 1.1 | 7.2 | 5.9 | 8.9 | 13.9 | 14.5 | 20.7 | 1.4 | 1.0 |
| MNRJ 25620 | 1 | 26.9 | 8.1 | 8.7 | 3.1 | 2.4 | 1.3 | 2.4 | 3.9 | 2.0 | 0.9 | 7.8 | 5.9 | 8.6 | 13.7 | 14.3 | 20.1 | 1.3 | 1.3 |
| MNRJ 25621 | 1 | 26.2 | 8.2 | 8.5 | 3.0 | 2.3 | 1.2 | 2.4 | 3.8 | 1.9 | 0.8 | 7.8 | 6.2 | 8.5 | 13.9 | 15.0 | 20.7 | 1.2 | 1.1 |
| MZUSP 63206 | 2 | 34.4 | 10.6 | 10.9 | 4.5 | 3.5 | 1.9 | 3.6 | 4.6 | 2.9 | 1.4 | 9.8 | 7.8 | 10.4 | 17.2 | 17.6 | 25.5 | 2.4 | 2.1 |
| MZUSP 63207 | 1 | 26.8 | 8.1 | 8.8 | 3.8 | 3.1 | 1.4 | 3.1 | 4.4 | 2.4 | 1.1 | 7.6 | 6.3 | 8.9 | 14.2 | 14.9 | 19.6 | 1.5 | 1.5 |
| UFBA 9587 | 1 | 26.6 | 6.9 | 8.6 | 2.9 | 2.3 | 1.2 | 2.5 | 3.6 | 2.2 | 1.1 | 7.8 | 6.3 | 7.8 | 13.6 | 14.1 | 19.5 | 1.3 | 1.3 |
| UFBA 9588 | 1 | 29.6 | 8.6 | 9.1 | 3.0 | 2.3 | 1.2 | 2.6 | 3.6 | 2.0 | 1.0 | 7.5 | 7.1 | 8.9 | 15.4 | 15.7 | 21.9 | 1.3 | 1.1 |
| UFBA 9589 | 1 | 29.3 | 7.0 | 8.9 | 3.2 | 2.4 | 1.4 | 2.9 | 3.7 | 2.0 | 0.9 | 8.1 | 6.9 | 8.4 | 14.8 | 15.6 | 20.4 | 1.3 | 1.3 |
| UFBA 9590 | 1 | 29.2 | 8.7 | 9.1 | 2.9 | 2.3 | 1.2 | 2.7 | 3.5 | 2.1 | 0.9 | 8.1 | 6.9 | 8.6 | 14.0 | 15.0 | 20.4 | 1.4 | 1.3 |
| UFBA 9591 | 1 | 27.1 | 6.7 | 8.1 | 2.8 | 2.3 | 1.2 | 2.3 | 3.7 | 2.1 | 1.1 | 6.7 | 6.8 | 8.2 | 13.7 | 14.7 | 20.4 | 1.2 | 1.2 |
| UFBA 9592 | 1 | 28.4 | 8.4 | 9.2 | 3.3 | 2.4 | 1.2 | 2.9 | 3.6 | 2.0 | 1.0 | 8.3 | 6.5 | 8.7 | 14.8 | 15.4 | 20.9 | 1.3 | 1.2 |
| UFBA 9593 | 1 | 29.7 | 7.1 | 8.4 | 3.1 | 2.3 | 1.2 | 2.8 | 3.5 | 2.2 | 1.1 | 8.1 | 6.9 | 8.6 | 14.5 | 15.5 | 21.0 | 1.3 | 1.2 |
| UFBA 9594 | 1 | 28.7 | 7.9 | 9.0 | 2.9 | 2.4 | 1.4 | 2.8 | 4.0 | 2.0 | 1.0 | 7.2 | 6.5 | 9.8 | 14.8 | 15.5 | 21.4 | 1.3 | 1.1 |
| UFBA 9595 | 1 | 27.2 | 8.0 | 8.7 | 2.9 | 2.3 | 1.1 | 2.6 | 3.6 | 2.1 | 1.0 | 7.5 | 6.4 | 7.8 | 13.7 | 14.7 | 20.1 | 1.4 | 1.3 |
| UFBA 9596 | 2 | 34.3 | 9.9 | 10.2 | 3.4 | 2.8 | 1.1 | 2.7 | 4.1 | 2.3 | 1.1 | 9.9 | 7.7 | 10.6 | 17.6 | 18.7 | 25.1 | 1.9 | 1.6 |
| MNRJ 36954 | 1 | 23.5 | 7.3 | 7.3 | 2.9 | 2.0 | 1.1 | 2.4 | 3.5 | 1.8 | 0.7 | 6.4 | 5.8 | 7.3 | 12.4 | 12.7 | 16.8 | 1.1 | 1.2 |
| MNRJ 15508 | 1 | 26.7 | 7.8 | 7.9 | 2.9 | 2.2 | 1.0 | 2.2 | 3.1 | 1.7 | 0.8 | 7.7 | 6.4 | 8.1 | 13.0 | 13.6 | 18.8 | 1.3 | 1.2 |
| MNRJ 31796 | 1 | 23.0 | 7.9 | 8.5 | 2.8 | 2.1 | 1.2 | 2.4 | 3.4 | 1.6 | 0.8 | 6.8 | 5.9 | 7.9 | 13.0 | 14.1 | 18.5 | 1.1 | 1.2 |
| MNRJ 31797 | 1 | 25.0 | 7.9 | 8.0 | 3.3 | 2.2 | 1.3 | 2.6 | 3.5 | 1.9 | 0.9 | 7.5 | 5.9 | 8.0 | 13.2 | 13.9 | 19.2 | 1.3 | 1.2 |
| MNRJ 30377 | 1 | 25.6 | 8.3 | 8.4 | 3.1 | 2.3 | 1.2 | 2.6 | 3.1 | 1.9 | 1.1 | 7.6 | 5.7 | 7.2 | 13.0 | 14.0 | 19.8 | 1.4 | 1.3 |
| MNRJ 30378 | 1 | 26.1 | 8.0 | 8.3 | 3.3 | 2.3 | 1.2 | 2.6 | 3.4 | 2.0 | 1.0 | 7.6 | 6.5 | 8.0 | 13.5 | 14.8 | 19.9 | 1.2 | 1.2 |
| MNRJ 30379 | 1 | 26.9 | 8.1 | 8.8 | 3.1 | 2.3 | 1.4 | 2.6 | 3.5 | 2.2 | 1.0 | 7.5 | 5.9 | 8.6 | 13.7 | 14.5 | 19.5 | 1.3 | 1.3 |
| MNRJ 30380 | 1 | 26.5 | 8.1 | 8.4 | 3.1 | 2.2 | 1.1 | 2.7 | 3.6 | 2.0 | 1.4 | 7.2 | 6.0 | 8.0 | 13.9 | 14.4 | 19.8 | 1.2 | 1.4 |
| MNRJ 30381 | 1 | 27.1 | 8.1 | 8.5 | 3.2 | 1.9 | 1.5 | 2.6 | 3.5 | 2.0 | 1.1 | 6.6 | 6.6 | 7.8 | 14.7 | 15.0 | 20.0 | 1.2 | 1.2 |
| MNRJ 29756 | 1 | 27.0 | 8.1 | 8.2 | 3.0 | 2.2 | 1.2 | 2.5 | 3.0 | 2.0 | 1.0 | 7.4 | 6.1 | 8.0 | 13.4 | 14.5 | 19.4 | 1.3 | 1.2 |
| MNRJ 29857 | 1 | 27.0 | 8.2 | 8.4 | 3.2 | 2.3 | 1.4 | 2.6 | 3.3 | 2.0 | 1.0 | 7.9 | 6.4 | 8.6 | 14.8 | 15.4 | 21.7 | 1.4 | 1.2 |
| UFBA 8446 | 1 | 26.0 | 7.8 | 7.9 | 3.0 | 1.9 | 1.3 | 2.2 | 3.7 | 1.9 | 9.3 | 7.2 | 6.4 | 8.8 | 13.4 | 14.0 | 20.1 | 1.3 | 1.3 |
| UFBA 8447 | 1 | 27.1 | 8.3 | 8.6 | 3.2 | 2.2 | 1.5 | 2.7 | 3.2 | 1.9 | 9.3 | 7.3 | 6.8 | 8.8 | 13.0 | 14.0 | 20.2 | 1.3 | 1.2 |
| UFBA 8448 | 1 | 28.5 | 8.5 | 9.0 | 3.4 | 2.2 | 1.4 | 2.6 | 3.5 | 2.1 | 9.3 | 7.9 | 7.0 | 9.4 | 14.3 | 15.2 | 21.1 | 1.5 | 1.3 |
| UFBA 8449 | 2 | 33.1 | 9.2 | 9.7 | 2.8 | 2.7 | 1.5 | 2.9 | 4.2 | 2.1 | 9.3 | 9.8 | 7.3 | 10.3 | 15.8 | 17.4 | 24.6 | 1.5 | 1.3 |
| UFBA 8450 | 1 | 26.6 | 8.2 | 8.8 | 2.9 | 2.0 | 1.2 | 2.6 | 3.9 | 2.0 | 9.3 | 7.4 | 7.2 | 8.4 | 13.1 | 13.7 | 19.4 | 1.3 | 1.3 |
| UFBA 8451 | 1 | 27.3 | 7.7 | 8.2 | 3.1 | 1.8 | 1.1 | 2.8 | 3.4 | 1.8 | 7.2 | 7.5 | 6.4 | 8.1 | 13.2 | 13.8 | 19.6 | 1.5 | 1.3 |
| UFBA 8452 | 1 | 27.8 | 8.4 | 8.7 | 3.1 | 1.9 | 1.5 | 2.8 | 3.9 | 1.8 | 9.3 | 7.7 | 6.5 | 8.9 | 13.8 | 14.8 | 20.5 | 1.4 | 1.3 |
| UFBA 8453 | 1 | 27.4 | 7.9 | 8.0 | 3.1 | 1.9 | 1.3 | 2.9 | 3.3 | 1.8 | 7.2 | 7.2 | 6.6 | 8.7 | 13.2 | 14.3 | 20.0 | 1.3 | 1.3 |
| UFBA 8454 | 1 | 27.4 | 8.0 | 8.2 | 3.0 | 2.3 | 1.3 | 2.6 | 3.8 | 1.9 | 9.3 | 7.8 | 6.8 | 9.1 | 13.7 | 14.9 | 20.6 | 1.3 | 1.3 |
| UFBA 8455 | 2 | 33.4 | 10.0 | 9.9 | 3.9 | 2.5 | 1.5 | 2.8 | 4.3 | 2.1 | 10.3 | 9.1 | 7.6 | 10.3 | 15.5 | 16.8 | 23.6 | 1.8 | 1.8 |
| UFBA 8456 | 1 | 27.2 | 7.9 | 7.8 | 2.9 | 2.2 | 1.4 | 2.2 | 3.6 | 2.0 | 9.3 | 7.4 | 6.9 | 9.0 | 13.2 | 14.5 | 20.3 | 1.4 | 1.4 |
| UFBA 8457 | 1 | 27.2 | 8.1 | 8.3 | 3.0 | 2.1 | 1.3 | 2.4 | 3.6 | 1.9 | 9.3 | 7.4 | 6.4 | 8.9 | 13.2 | 14.1 | 19.8 | 1.3 | 1.3 |
| UFBA 8458 | 1 | 26.4 | 7.9 | 8.1 | 2.1 | 2.1 | 1.2 | 2.4 | 3.6 | 1.8 | 9.3 | 7.9 | 6.9 | 8.7 | 13.8 | 14.8 | 20.8 | 1.3 | 1.2 |
| UFBA 8459 | 1 | 26.5 | 8.3 | 8.6 | 3.1 | 2.2 | 1.2 | 2.3 | 3.5 | 2.0 | 10.3 | 7.2 | 6.6 | 8.2 | 13.2 | 14.3 | 19.9 | 1.3 | 1.2 |
| UFBA 8460 | 1 | 26.9 | 8.2 | 8.4 | 3.3 | 2.1 | 1.3 | 2.3 | 3.5 | 1.9 | 9.3 | 7.7 | 6.1 | 9.1 | 13.5 | 14.3 | 19.8 | 1.4 | 1.2 |
| UFBA 8461 | 1 | 27.8 | 7.9 | 8.5 | 2.9 | 2.2 | 1.3 | 2.4 | 3.6 | 1.9 | 9.3 | 7.2 | 6.8 | 8.7 | 13.4 | 14.7 | 21.1 | 1.4 | 1.3 |
| UFBA 8462 | 1 | 26.1 | 7.9 | 8.4 | 2.8 | 2.2 | 1.2 | 2.1 | 3.2 | 1.6 | 8.2 | 7.3 | 6.3 | 7.6 | 13.5 | 14.0 | 19.4 | 1.2 | 1.2 |
| UFBA 8463 | 1 | 27.1 | 7.5 | 8.3 | 2.9 | 2.1 | 1.1 | 2.3 | 3.4 | 1.6 | 7.2 | 7.6 | 7.2 | 8.6 | 13.7 | 14.4 | 20.4 | 1.3 | 1.2 |
| UFBA 8464 | 1 | 26.9 | 8.2 | 8.4 | 2.9 | 2.3 | 1.3 | 2.5 | 3.6 | 1.6 | 8.2 | 7.3 | 6.7 | 8.6 | 13.2 | 14.0 | 20.2 | 1.4 | 1.3 |
| MHNCI 1399 | 1 | 27.9 | 8.3 | 8.6 | 2.8 | 2.1 | 1.1 | 2.4 | 3.3 | 2.0 | 0.9 | 7.1 | 6.8 | 8.3 | 13.7 | 14.6 | 20.2 | 1.0 | 1.0 |
| MHNCI 1400 | 1 | 27.1 | 8.3 | 8.7 | 3.2 | 2.1 | 1.3 | 2.6 | 3.5 | 2.0 | 1.0 | 7.5 | 6.8 | 8.6 | 13.1 | 14.2 | 20.5 | 1.5 | 1.4 |
| MHNCI 1401 | 1 | 27.2 | 8.4 | 8.0 | 3.0 | 2.2 | 1.3 | 2.8 | 3.5 | 2.0 | 0.8 | 7.2 | 6.5 | 9.0 | 13.1 | 14.1 | 20.2 | 1.4 | 1.3 |
| MHNCI 1402 | 1 | 27.0 | 7.9 | 8.0 | 3.1 | 2.2 | 1.3 | 2.8 | 3.6 | 1.9 | 1.1 | 7.7 | 6.2 | 8.9 | 13.3 | 14.4 | 20.2 | 1.5 | 1.4 |
| MHNCI 1403 | 1 | 27.2 | 8.2 | 8.7 | 2.9 | 2.3 | 1.3 | 2.4 | 3.2 | 2.0 | 0.9 | 7.6 | 6.2 | 8.6 | 13.4 | 14.2 | 19.6 | 1.2 | 1.1 |
| MHNCI 1404 | 1 | 26.3 | 8.1 | 8.0 | 2.9 | 2.2 | 1.2 | 2.5 | 3.6 | 2.0 | 0.9 | 7.2 | 5.6 | 8.0 | 12.8 | 14.0 | 19.6 | 1.3 | 1.2 |
| MHNCI 1405 | 1 | 24.9 | 8.2 | 8.2 | 3.0 | 2.1 | 1.2 | 2.4 | 3.5 | 2.0 | 1.0 | 6.9 | 6.1 | 8.4 | 12.7 | 13.3 | 19.0 | 1.4 | 1.2 |
| MHNCI 1406 | 1 | 25.8 | 7.7 | 8.1 | 2.9 | 2.1 | 1.1 | 2.5 | 3.3 | 1.8 | 0.9 | 7.5 | 6.3 | 8.6 | 13.4 | 14.1 | 19.9 | 1.4 | 1.3 |
| MNRJ 29453 | 1 | 25.2 | 7.7 | 8.1 | 2.9 | 2.2 | 1.1 | 2.3 | 3.3 | 1.9 | 1.0 | 6.8 | 6.0 | 7.5 | 12.2 | 13.6 | 18.1 | 1.2 | 1.1 |
| MNRJ 29454 | 1 | 26.0 | 7.4 | 7.5 | 2.9 | 2.2 | 1.0 | 2.5 | 3.1 | 1.6 | 1.0 | 7.3 | 6.0 | 8.1 | 12.5 | 13.5 | 18.2 | 1.4 | 1.3 |
| MNRJ 29455 | 1 | 26.6 | 7.9 | 8.3 | 3.0 | 2.3 | 1.2 | 2.7 | 3.2 | 1.6 | 1.0 | 7.4 | 6.3 | 7.4 | 13.2 | 13.9 | 18.3 | 1.3 | 1.3 |
| MNRJ 29456 | 1 | 25.3 | 7.6 | 7.9 | 2.8 | 2.2 | 1.0 | 2.2 | 2.9 | 1.9 | 0.8 | 7.5 | 6.1 | 8.2 | 13.3 | 14.3 | 18.9 | 1.3 | 1.2 |
| MNRJ 29703 | 1 | 24.9 | 7.3 | 7.7 | 3.0 | 2.1 | 1.5 | 2.8 | 2.7 | 1.5 | 0.9 | 6.6 | 5.7 | 8.2 | 13.0 | 13.4 | 18.3 | 1.3 | 1.0 |
| MNRJ 29704 | 1 | 26.1 | 7.3 | 7.9 | 2.9 | 2.2 | 1.2 | 3.1 | 2.9 | 1.6 | 0.8 | 7.4 | 6.4 | 8.7 | 13.5 | 14.1 | 18.4 | 1.2 | 1.1 |
| MNRJ 29705 | 1 | 25.9 | 7.5 | 8.0 | 3.2 | 2.4 | 1.3 | 2.5 | 3.1 | 1.5 | 0.7 | 7.4 | 6.0 | 8.8 | 12.9 | 13.4 | 18.4 | 1.3 | 1.0 |
| MNRJ 29706 | 1 | 25.4 | 7.6 | 7.5 | 2.9 | 2.3 | 1.4 | 2.9 | 2.7 | 1.6 | 0.9 | 7.1 | 5.8 | 8.1 | 12.8 | 13.6 | 18.2 | 1.1 | 1.1 |
| MNRJ 29707 | 1 | 27.8 | 7.3 | 7.9 | 2.6 | 2.2 | 1.1 | 2.8 | 3.1 | 1.5 | 1.1 | 7.4 | 6.4 | 8.3 | 13.8 | 14.0 | 17.3 | 1.3 | 1.1 |
| MNRJ 29708 | 1 | 23.5 | 6.8 | 7.1 | 2.8 | 2.1 | 1.0 | 2.2 | 3.2 | 1.6 | 1.0 | 5.7 | 5.6 | 7.3 | 12.1 | 12.5 | 15.9 | 1.2 | 1.1 |
| MNRJ 29709 | 1 | 23.5 | 7.2 | 7.3 | 2.8 | 2.1 | 1.2 | 2.1 | 3.7 | 1.3 | 0.7 | 6.3 | 6.1 | 7.7 | 12.3 | 13.1 | 18.4 | 1.1 | 0.9 |
| MNRJ 29710 | 1 | 26.4 | 7.0 | 7.9 | 2.9 | 2.3 | 1.0 | 2.2 | 3.8 | 1.3 | 0.9 | 7.5 | 5.6 | 8.3 | 13.4 | 14.0 | 19.4 | 1.2 | 1.1 |
| MNRJ 29711 | 1 | 25.6 | 7.1 | 8.1 | 2.5 | 2.3 | 1.3 | 2.4 | 3.3 | 1.8 | 0.7 | 7.2 | 5.8 | 7.6 | 13.0 | 13.1 | 17.7 | 1.2 | 1.1 |
| MNRJ 29712 | 1 | 24.8 | 6.1 | 7.8 | 2.8 | 2.3 | 1.1 | 2.5 | 3.2 | 1.5 | 0.9 | 7.1 | 5.5 | 7.7 | 12.9 | 13.4 | 18.3 | 1.2 | 1.1 |
| MNRJ 29713 | 1 | 23.9 | 7.1 | 7.5 | 2.8 | 2.1 | 1.0 | 2.3 | 3.3 | 1.1 | 0.6 | 6.9 | 5.5 | 7.6 | 12.8 | 13.0 | 17.6 | 1.1 | 1.0 |
| MNRJ 29394 | 1 | 25.8 | 7.9 | 7.9 | 3.1 | 2.3 | 1.4 | 2.1 | 3.4 | 1.8 | 0.9 | 7.8 | 6.3 | 8.2 | 13.3 | 14.5 | 20.0 | 1.2 | 1.0 |
| MNRJ 29431 | 1 | 24.6 | 7.2 | 7.3 | 2.9 | 2.3 | 1.0 | 2.1 | 3.1 | 1.8 | 0.9 | 7.3 | 6.3 | 7.7 | 13.0 | 13.6 | 19.2 | 1.0 | 0.9 |
| MNRJ 29420 | 1 | 24.8 | 8.0 | 8.3 | 2.6 | 2.5 | 1.3 | 2.3 | 2.7 | 1.7 | 0.8 | 7.3 | 6.1 | 8.5 | 13.1 | 14.0 | 19.7 | 1.2 | 1.2 |
| MNRJ 29427 | 1 | 24.5 | 7.7 | 7.5 | 2.9 | 2.3 | 1.4 | 2.2 | 3.1 | 2.0 | 1.0 | 7.1 | 6.4 | 8.1 | 12.9 | 13.3 | 18.4 | 1.4 | 1.3 |
| MNRJ 29266 | 1 | 26.7 | 7.3 | 8.0 | 3.0 | 2.3 | 1.2 | 2.3 | 2.7 | 1.8 | 0.8 | 7.1 | 6.2 | 8.1 | 12.9 | 14.0 | 19.2 | 1.3 | 1.2 |
| MNRJ 29300 | 1 | 26.1 | 7.8 | 8.0 | 2.6 | 2.1 | 1.3 | 2.5 | 3.1 | 1.8 | 1.0 | 6.4 | 6.2 | 7.6 | 12.9 | 13.0 | 17.1 | 1.2 | 0.9 |
| MNRJ 29301 | 1 | 25.0 | 8.1 | 8.5 | 2.9 | 2.1 | 1.3 | 2.9 | 3.0 | 1.7 | 0.8 | 7.6 | 6.0 | 8.0 | 13.0 | 14.0 | 19.2 | 1.3 | 1.2 |
| MNRJ 29302 | 1 | 24.7 | 7.6 | 8.2 | 2.9 | 2.0 | 1.2 | 2.5 | 3.4 | 1.8 | 0.9 | 7.1 | 6.0 | 8.1 | 12.9 | 13.3 | 18.1 | 1.3 | 1.3 |
| MNRJ 29303 | 1 | 25.4 | 8.5 | 8.6 | 3.1 | 2.0 | 1.4 | 2.6 | 3.0 | 1.8 | 1.0 | 7.3 | 6.3 | 7.9 | 13.0 | 13.9 | 18.9 | 1.3 | 1.3 |
| MNRJ 29304 | 2 | 26.0 | 7.2 | 8.3 | 2.9 | 2.1 | 1.4 | 2.7 | 3.6 | 1.8 | 0.9 | 7.2 | 6.2 | 7.9 | 13.1 | 13.8 | 19.0 | 1.3 | 1.2 |
| MNRJ 29266 | 1 | 26.9 | 7.7 | 8.1 | 3.1 | 2.3 | 1.2 | 2.5 | 3.4 | 1.8 | 0.9 | 7.2 | 6.2 | 8.2 | 13.2 | 14.0 | 18.9 | 1.3 | 1.2 |
| MNRJ 56484 | 1 | 25.2 | 7.8 | 8.3 | 2.7 | 2.1 | 1.3 | 2.0 | 3.1 | 1.7 | 0.8 | 6.2 | 6.4 | 8.2 | 12.7 | 13.5 | 18.4 | 1.2 | 1.0 |
| MNRJ 56485 | 1 | 25.1 | 7.3 | 8.0 | 2.6 | 1.8 | 1.3 | 2.2 | 3.1 | 1.7 | 0.8 | 7.1 | 6.2 | 8.0 | 12.6 | 13.1 | 17.9 | 1.3 | 1.2 |
| MNRJ 56486 | 2 | 31.3 | 8.5 | 9.1 | 2.9 | 2.2 | 1.3 | 2.7 | 3.3 | 2.0 | 0.9 | 8.2 | 7.1 | 9.4 | 15.3 | 15.9 | 21.9 | 1.4 | 1.4 |
| MNRJ 46490 | 1 | 27.1 | 8.8 | 8.9 | 3.1 | 2.6 | 1.2 | 2.7 | 3.2 | 1.8 | 0.9 | 7.1 | 5.8 | 8.0 | 13.3 | 14.1 | 19.5 | 1.5 | 1.3 |
| MNRJ 46491 | 1 | 27.0 | 8.4 | 8.3 | 2.8 | 2.3 | 1.3 | 2.3 | 3.8 | 2.0 | 0.9 | 7.7 | 5.9 | 8.2 | 13.5 | 14.6 | 20.1 | 1.4 | 1.4 |
| MNRJ 46492 | 1 | 28.3 | 8.2 | 8.9 | 2.9 | 2.1 | 1.1 | 2.6 | 2.9 | 1.9 | 0.9 | 7.5 | 6.4 | 8.3 | 14.1 | 14.8 | 20.4 | 1.6 | 1.4 |
| MNRJ 29080 | 1 | 28.9 | 8.7 | 8.9 | 2.9 | 2.7 | 1.4 | 2.3 | 3.5 | 2.1 | 1.0 | 8.1 | 5.9 | 8.9 | 14.3 | 15.2 | 20.8 | 1.3 | 1.4 |
| MNRJ 29081 | 1 | 25.9 | 8.5 | 8.6 | 2.9 | 2.0 | 1.4 | 2.7 | 3.1 | 2.1 | 1.1 | 7.6 | 5.4 | 8.3 | 13.6 | 14.2 | 18.8 | 1.3 | 1.3 |
| CFBH 4066 | 1 | 25.5 | 8.4 | 8.5 | 3.4 | 2.3 | 1.3 | 2.9 | 3.3 | 2.2 | 0.9 | 7.0 | 5.8 | 7.9 | 13.1 | 13.7 | 18.7 | 1.3 | 1.2 |
| MNRJ 31399 | 2 | 30.9 | 8.9 | 9.5 | 3.3 | 2.7 | 1.3 | 2.2 | 3.8 | 2.1 | 1.1 | 7.8 | 6.8 | 8.8 | 14.7 | 15.6 | 20.8 | 1.6 | 1.5 |
| MNRJ 31401 | 1 | 27.8 | 8.3 | 9.0 | 2.9 | 2.4 | 1.1 | 2.4 | 3.6 | 2.0 | 0.9 | 7.7 | 6.6 | 8.2 | 13.9 | 14.3 | 20.0 | 1.3 | 1.3 |
| MNRJ 31402 | 1 | 27.1 | 8.3 | 8.2 | 3.0 | 2.4 | 1.1 | 2.5 | 3.6 | 1.9 | 1.0 | 7.8 | 6.6 | 8.5 | 14.0 | 14.8 | 20.7 | 1.5 | 1.4 |
| MNRJ 31404 | 1 | 27.0 | 7.9 | 8.4 | 2.9 | 2.4 | 1.0 | 2.0 | 3.6 | 1.8 | 0.9 | 7.3 | 6.3 | 7.8 | 13.4 | 14.1 | 16.7 | 1.3 | 1.2 |
| MNRJ 31405 | 1 | 27.3 | 8.0 | 8.2 | 2.9 | 2.5 | 0.9 | 2.1 | 3.7 | 1.5 | 0.8 | 7.3 | 6.3 | 7.6 | 13.1 | 13.8 | 18.5 | 1.2 | 1.1 |
| MNRJ 31446 | 1 | 26.8 | 7.7 | 8.0 | 2.9 | 2.3 | 1.3 | 2.6 | 2.8 | 1.4 | 0.9 | 7.2 | 6.0 | 8.1 | 12.7 | 13.2 | 18.9 | 1.3 | 1.3 |
| MNRJ 31447 | 1 | 25.4 | 8.0 | 7.8 | 2.9 | 2.3 | 1.1 | 2.5 | 3.4 | 1.6 | 0.7 | 6.9 | 5.7 | 7.6 | 11.9 | 12.9 | 17.2 | 1.3 | 1.3 |
| MNRJ 31448 | 2 | 32.8 | 9.5 | 10.0 | 3.5 | 2.8 | 1.4 | 2.7 | 4.4 | 2.3 | 1.1 | 10.1 | 7.1 | 10.5 | 16.5 | 17.3 | 24.3 | 2.2 | 2.1 |
| MNRJ 31449 | 1 | 25.7 | 8.0 | 7.9 | 2.9 | 2.1 | 1.2 | 2.4 | 2.9 | 1.8 | 1.0 | 7.8 | 6.3 | 8.2 | 12.4 | 13.5 | 18.4 | 1.4 | 1.3 |
| MNRJ 31450 | 1 | 27.6 | 8.2 | 8.0 | 3.1 | 2.2 | 1.1 | 2.6 | 3.1 | 1.9 | 0.9 | 7.8 | 5.4 | 8.7 | 13.3 | 14.5 | 19.8 | 1.4 | 1.3 |
| MNRJ 31566 | 1 | 25.4 | 8.9 | 8.7 | 3.0 | 2.3 | 1.2 | 2.0 | 3.6 | 2.0 | 0.9 | 6.5 | 6.3 | 8.9 | 13.1 | 13.8 | 20.4 | 1.6 | 1.4 |
| MNRJ 31567 | 2 | 36.4 | 10.9 | 10.5 | 4.3 | 2.7 | 1.8 | 3.0 | 3.9 | 2.6 | 1.4 | 10.6 | 7.6 | 11.3 | 17.8 | 18.5 | 25.9 | 2.2 | 2.1 |
| MNRJ 38150 | 2 | 29.4 | 8.9 | 8.9 | 3.1 | 2.4 | 1.5 | 2.1 | 3.4 | 2.1 | 1.1 | 8.2 | 6.5 | 9.2 | 14.8 | 15.4 | 21.9 | 1.8 | 1.6 |
| MNRJ 38151 | 1 | 26.4 | 7.9 | 8.2 | 2.7 | 1.8 | 1.1 | 2.2 | 3.1 | 1.5 | 0.8 | 7.3 | 5.7 | 8.1 | 13.6 | 14.0 | 18.9 | 1.1 | 1.1 |
| MNRJ 30699 | 1 | 26.4 | 8.0 | 8.0 | 3.0 | 2.3 | 1.1 | 2.5 | 3.7 | 1.9 | 1.0 | 7.5 | 5.8 | 8.2 | 13.6 | 14.6 | 20.2 | 1.3 | 1.2 |
| MNRJ 30700 | 2 | 32.9 | 10.5 | 10.5 | 3.7 | 2.6 | 1.3 | 2.8 | 4.4 | 2.6 | 1.4 | 8.8 | 6.9 | 10.0 | 16.9 | 17.9 | 24.2 | 2.0 | 1.9 |
| MNRJ 34476 | 1 | 23.9 | 7.6 | 7.9 | 3.0 | 2.4 | 1.1 | 2.4 | 3.4 | 1.8 | 0.8 | 6.9 | 5.4 | 7.7 | 12.4 | 12.8 | 18.0 | 1.2 | 1.0 |
| MNRJ 34477 | 1 | 24.5 | 7.8 | 8.0 | 3.0 | 2.0 | 1.1 | 2.0 | 3.4 | 1.6 | 0.8 | 7.1 | 5.6 | 8.2 | 12.4 | 13.2 | 19.3 | 1.1 | 1.0 |
| MZUSP 70753 | 1 | 29.1 | 8.2 | 8.6 | 3.3 | 2.0 | 1.0 | 2.8 | 2.9 | 2.1 | 1.0 | 7.7 | 6.5 | 8.4 | 13.0 | 15.4 | 20.2 | 1.1 | 1.0 |
| MZUSP 126223 | 1 | 27.9 | 8.3 | 8.4 | 2.8 | 2.1 | 1.4 | 2.4 | 3.3 | 1.9 | 1.1 | 7.7 | 6.2 | 7.7 | 13.2 | 13.9 | 19.2 | 1.1 | 1.1 |
| MZUSP 126224 | 1 | 27.9 | 8.2 | 8.6 | 3.1 | 2.3 | 1.4 | 2.4 | 3.4 | 2.0 | 1.1 | 7.5 | 6.7 | 8.2 | 13.0 | 13.6 | 19.7 | 1.3 | 1.1 |
| MZUSP 126225 | 1 | 26.6 | 7.6 | 7.9 | 2.8 | 2.1 | 1.4 | 2.3 | 3.0 | 1.9 | 1.1 | 7.1 | 6.5 | 7.7 | 13.0 | 13.6 | 17.0 | 1.1 | 1.0 |
| MZUSP 126226 | 1 | 27.1 | 8.7 | 8.6 | 3.3 | 2.5 | 1.3 | 2.4 | 3.4 | 1.9 | 1.0 | 7.4 | 6.8 | 8.4 | 13.0 | 14.1 | 20.0 | 1.0 | 1.0 |
| MZUSP 126227 | 1 | 27.4 | 8.1 | 8.2 | 3.1 | 2.4 | 1.3 | 2.3 | 3.3 | 1.9 | 1.0 | 7.4 | 6.0 | 7.7 | 13.1 | 14.0 | 18.7 | 1.1 | 1.0 |
| MZUSP 126228 | 1 | 27.2 | 8.3 | 8.1 | 3.3 | 2.0 | 1.4 | 2.3 | 3.6 | 1.9 | 1.1 | 7.7 | 6.6 | 7.9 | 13.7 | 14.3 | 18.6 | 1.1 | 1.0 |
| MZUSP 126229 | 1 | 26.0 | 7.3 | 7.9 | 2.9 | 2.3 | 1.4 | 2.4 | 3.4 | 1.8 | 1.0 | 7.3 | 6.2 | 7.3 | 13.1 | 13.4 | 16.9 | 1.3 | 1.1 |
| MZUSP 126230 | 1 | 26.2 | 7.6 | 8.0 | 2.8 | 2.0 | 1.3 | 2.3 | 3.4 | 1.8 | 0.9 | 7.0 | 6.0 | 7.8 | 12.3 | 12.9 | 17.5 | 1.1 | 1.0 |
| MZUSP 126231 | 1 | 28.3 | 7.9 | 8.5 | 3.0 | 2.3 | 1.6 | 2.4 | 3.4 | 1.8 | 0.9 | 7.1 | 6.6 | 8.2 | 13.8 | 14.0 | 20.2 | 1.4 | 1.3 |
| MZUSP 126232 | 1 | 25.7 | 7.7 | 7.7 | 3.0 | 2.1 | 1.4 | 2.0 | 3.4 | 1.8 | 0.9 | 5.8 | 6.6 | 7.2 | 12.9 | 13.8 | 18.4 | 1.0 | 1.0 |
| MZUSP 126233 | 1 | 28.3 | 7.0 | 7.8 | 3.1 | 2.4 | 1.3 | 2.3 | 3.4 | 2.0 | 0.9 | 8.0 | 6.2 | 7.4 | 13.5 | 13.9 | 18.7 | 1.3 | 1.1 |
| MZUSP 126234 | 1 | 25.7 | 7.5 | 7.8 | 2.9 | 2.1 | 1.4 | 2.1 | 3.3 | 1.6 | 1.0 | 7.2 | 6.3 | 7.5 | 12.7 | 13.2 | 18.1 | 1.0 | 1.0 |
| MZUSP 126235 | 1 | 26.4 | 7.9 | 8.2 | 2.6 | 2.4 | 1.3 | 2.3 | 3.1 | 1.6 | 0.8 | 7.0 | 6.5 | 8.0 | 12.8 | 13.3 | 18.3 | 1.3 | 1.0 |
| MZUSP 126236 | 1 | 25.3 | 7.8 | 8.0 | 2.9 | 2.0 | 1.4 | 2.4 | 3.4 | 1.8 | 0.8 | 7.2 | 6.4 | 7.4 | 11.0 | 13.6 | 18.3 | 1.3 | 1.0 |
| MZUSP 126237 | 1 | 26.3 | 6.2 | 7.5 | 2.8 | 2.1 | 1.0 | 2.1 | 3.0 | 1.6 | 1.0 | 7.3 | 5.7 | 7.2 | 13.4 | 12.9 | 17.9 | 1.1 | 1.0 |
| MZUSP 126238 | 1 | 26.9 | 8.1 | 8.0 | 2.9 | 2.4 | 1.3 | 2.1 | 3.1 | 1.8 | 0.9 | 6.5 | 6.4 | 7.2 | 12.4 | 12.8 | 17.1 | 1.3 | 1.0 |
| MZUSP 126239 | 1 | 26.6 | 7.5 | 7.9 | 2.9 | 2.1 | 1.3 | 2.5 | 3.3 | 1.9 | 1.0 | 7.2 | 6.5 | 7.6 | 13.1 | 13.6 | 17.7 | 1.3 | 1.1 |
| MZUSP 126240 | 1 | 26.8 | 7.6 | 7.5 | 3.1 | 2.4 | 1.5 | 2.5 | 3.5 | 1.8 | 0.9 | 6.7 | 6.1 | 6.9 | 13.5 | 13.6 | 18.6 | 1.3 | 1.0 |
| MZUSP 126241 | 1 | 27.1 | 8.0 | 8.8 | 3.1 | 2.3 | 1.3 | 2.1 | 3.4 | 1.9 | 0.9 | 7.6 | 6.7 | 7.7 | 15.5 | 13.9 | 19.0 | 1.3 | 1.1 |
| CFBH 1060 | 1 | 24.0 | 7.5 | 7.7 | 3.0 | 2.2 | 1.0 | 2.6 | 3.3 | 1.9 | 0.7 | 7.1 | 6.0 | 7.9 | 12.5 | 13.1 | 18.2 | 1.1 | 0.9 |
| CFBH 1253 | 1 | 24.4 | 6.8 | 7.9 | 3.0 | 2.2 | 1.1 | 2.7 | 3.4 | 2.0 | 0.9 | 7.1 | 6.1 | 7.8 | 13.0 | 13.9 | 17.8 | 1.1 | 1.1 |
| CFBH 1255 | 1 | 26.0 | 7.0 | 7.7 | 3.2 | 2.3 | 1.2 | 2.8 | 3.5 | 1.9 | 0.9 | 6.9 | 5.9 | 7.5 | 12.6 | 13.4 | 19.0 | 1.2 | 1.0 |
| CFBH 1256 | 1 | 24.5 | 7.5 | 7.9 | 3.2 | 2.3 | 1.1 | 2.8 | 3.6 | 2.0 | 1.1 | 7.4 | 6.3 | 8.1 | 12.9 | 13.7 | 19.5 | 1.1 | 1.0 |
| CFBH 1388 | 1 | 24.8 | 7.7 | 8.2 | 3.1 | 2.1 | 1.2 | 2.7 | 3.0 | 1.8 | 0.7 | 6.9 | 5.7 | 8.0 | 12.2 | 13.0 | 19.0 | 1.2 | 1.1 |
| CFBH 2099 | 1 | 28.5 | 8.7 | 8.7 | 3.5 | 2.5 | 1.5 | 2.6 | 3.7 | 1.6 | 0.9 | 8.0 | 6.3 | 8.6 | 14.3 | 15.1 | 20.5 | 1.3 | 1.3 |
| CFBH 2100 | 1 | 27.7 | 8.5 | 8.1 | 3.5 | 2.4 | 1.3 | 2.9 | 3.6 | 1.9 | 0.9 | 7.6 | 6.6 | 7.8 | 13.6 | 14.3 | 20.1 | 1.3 | 1.2 |
| CFBH 2101 | 1 | 26.3 | 7.2 | 8.3 | 3.1 | 2.3 | 1.3 | 2.7 | 3.5 | 1.5 | 0.8 | 7.4 | 6.0 | 8.1 | 13.1 | 13.6 | 19.5 | 1.3 | 1.2 |
| MNRJ 27226 | 1 | 26.2 | 8.3 | 8.4 | 2.8 | 2.1 | 1.1 | 2.1 | 3.2 | 1.5 | 0.7 | 7.5 | 6.1 | 8.0 | 13.4 | 14.2 | 19.5 | 1.2 | 1.2 |
| MNRJ 27227 | 1 | 24.5 | 7.6 | 8.0 | 2.5 | 1.9 | 0.9 | 1.8 | 3.2 | 1.5 | 0.6 | 7.5 | 5.6 | 7.7 | 12.8 | 13.5 | 17.5 | 1.1 | 1.0 |
| MNRJ 27228 | 1 | 23.3 | 7.4 | 8.0 | 2.7 | 1.9 | 1.0 | 2.1 | 3.1 | 1.3 | 0.6 | 6.8 | 5.8 | 7.6 | 12.6 | 13.7 | 18.7 | 1.1 | 0.9 |
| MNRJ 27229 | 1 | 26.2 | 8.2 | 8.0 | 2.6 | 2.1 | 1.0 | 2.1 | 2.9 | 1.5 | 0.8 | 7.3 | 5.9 | 8.5 | 12.9 | 13.9 | 19.7 | 1.2 | 1.2 |
| UFBA 6671 | 1 | 24.4 | 8.1 | 7.9 | 3.0 | 1.9 | 1.3 | 1.9 | 3.2 | 1.9 | 1.0 | 7.8 | 5.8 | 7.3 | 13.2 | 13.8 | 18.5 | 1.2 | 1.0 |
| UFBA 7967 | 2 | 33.6 | 10.4 | 10.1 | 3.1 | 2.5 | 1.6 | 2.7 | 4.6 | 2.1 | 1.3 | 8.5 | 7.8 | 10.9 | 16.7 | 18.1 | 25.9 | 1.8 | 1.5 |
| UFBA 7968 | 2 | 31.8 | 9.6 | 10.3 | 3.3 | 2.4 | 1.4 | 2.9 | 4.7 | 2.4 | 1.3 | 9.2 | 7.6 | 10.1 | 15.1 | 17.0 | 24.8 | 1.9 | 1.8 |
| UFBA 7969 | 2 | 32.7 | 9.6 | 9.8 | 3.2 | 2.6 | 1.5 | 2.9 | 4.4 | 1.9 | 1.1 | 8.7 | 6.8 | 10.4 | 15.3 | 16.5 | 23.5 | 1.8 | 1.5 |
| UFBA 7970 | 2 | 34.6 | 10.6 | 10.9 | 3.9 | 2.8 | 1.6 | 3.3 | 4.5 | 2.2 | 1.2 | 9.4 | 7.4 | 10.6 | 16.9 | 18.1 | 26.2 | 2.2 | 1.9 |
| UFBA 7971 | 1 | 25.1 | 7.7 | 8.2 | 3.0 | 2.1 | 1.2 | 2.3 | 3.8 | 1.9 | 1.1 | 6.8 | 5.8 | 8.3 | 13.0 | 13.4 | 18.7 | 1.2 | 1.1 |
| UFBA 7972 | 1 | 25.5 | 7.9 | 8.4 | 2.9 | 2.1 | 1.1 | 3.6 | 3.4 | 1.9 | 1.1 | 7.3 | 5.6 | 8.6 | 13.1 | 14.1 | 19.3 | 1.3 | 1.2 |
| UFBA 7973 | 1 | 27.6 | 8.6 | 9.0 | 3.2 | 1.9 | 1.3 | 2.9 | 4.7 | 2.1 | 1.1 | 7.5 | 6.2 | 9.2 | 13.7 | 14.9 | 21.5 | 1.6 | 1.4 |
| UFBA 7974 | 2 | 34.8 | 10.7 | 11.2 | 3.5 | 2.4 | 1.5 | 2.9 | 5.5 | 2.5 | 1.3 | 9.1 | 7.5 | 10.5 | 16.6 | 17.9 | 25.5 | 2.1 | 1.9 |
| UFBA 7975 | 1 | 25.0 | 8.0 | 8.1 | 2.9 | 2.1 | 1.2 | 2.3 | 3.0 | 1.6 | 0.8 | 7.8 | 6.3 | 8.0 | 12.2 | 13.8 | 18.8 | 1.2 | 1.1 |
| UFBA 7976 | 1 | 26.4 | 8.2 | 8.4 | 2.9 | 1.9 | 1.1 | 2.5 | 3.5 | 1.9 | 0.8 | 7.2 | 5.7 | 8.1 | 12.9 | 13.6 | 19.3 | 1.4 | 1.4 |
| MZUSP 135919 | 1 | 28.9 | 8.9 | 8.5 | 3.4 | 2.3 | 1.5 | 2.6 | 3.6 | 1.9 | 0.9 | 8.1 | 6.9 | 8.6 | 14.8 | 15.2 | 21.2 | 1.0 | 1.0 |
| MZUSP 135920 | 1 | 28.9 | 8.9 | 9.1 | 3.1 | 2.5 | 1.5 | 2.8 | 3.8 | 2.1 | 0.9 | 8.2 | 6.5 | 8.7 | 14.6 | 15.1 | 21.5 | 1.4 | 1.4 |
| MZUSP 135914 | 1 | 27.1 | 7.9 | 8.4 | 2.6 | 2.3 | 1.1 | 2.8 | 3.3 | 2.0 | 0.9 | 7.7 | 6.7 | 8.5 | 13.0 | 14.4 | 20.5 | 1.3 | 1.3 |
| MZUSP 135915 | 1 | 25.7 | 7.8 | 8.1 | 2.9 | 2.3 | 1.3 | 2.1 | 3.1 | 2.0 | 1.0 | 6.3 | 6.3 | 8.0 | 13.3 | 13.7 | 19.8 | 1.1 | 1.0 |
| MZUSP 135916 | 1 | 26.9 | 8.2 | 8.9 | 3.4 | 2.0 | 1.4 | 2.8 | 3.3 | 1.8 | 0.9 | 7.1 | 6.8 | 8.2 | 13.6 | 14.4 | 20.3 | 1.4 | 1.3 |
| MZUSP 135917 | 1 | 27.7 | 8.4 | 9.0 | 3.3 | 2.3 | 1.4 | 2.4 | 3.5 | 2.0 | 1.1 | 7.2 | 6.4 | 8.8 | 13.8 | 14.3 | 8.9 | 1.5 | 1.4 |
| MZUSP 135918 | 1 | 26.0 | 7.9 | 8.3 | 2.9 | 2.1 | 1.1 | 2.5 | 3.1 | 1.8 | 1.0 | 7.9 | 6.7 | 8.3 | 14.2 | 14.8 | 20.1 | 1.0 | 1.0 |
| MZUSP 135910 | 1 | 25.6 | 8.1 | 8.0 | 2.9 | 2.1 | 1.1 | 2.4 | 3.1 | 2.0 | 1.0 | 7.3 | 6.1 | 8.6 | 13.0 | 13.5 | 18.2 | 1.4 | 1.3 |
| MZUSP 135911 | 1 | 24.0 | 8.0 | 7.9 | 2.9 | 2.4 | 1.4 | 2.6 | 3.3 | 1.9 | 0.9 | 6.8 | 6.3 | 8.2 | 13.1 | 14.1 | 19.1 | 1.3 | 1.1 |
| MZUSP 135912 | 1 | 26.1 | 8.3 | 7.8 | 2.8 | 2.1 | 1.4 | 2.5 | 3.4 | 2.4 | 0.9 | 7.5 | 6.4 | 7.8 | 13.4 | 14.1 | 19.4 | 1.5 | 1.5 |
| MZUSP 135913 | 1 | 27.4 | 8.0 | 8.8 | 3.0 | 2.4 | 1.4 | 2.6 | 3.5 | 2.4 | 1.1 | 7.8 | 6.3 | 8.9 | 12.9 | 14.4 | 19.7 | 1.6 | 1.5 |
| UFBA 8465 | 1 | 26.3 | 7.6 | 8.4 | 2.9 | 1.9 | 1.2 | 2.8 | 3.4 | 2.0 | 10.3 | 6.8 | 6.1 | 8.4 | 13.9 | 14.5 | 20.0 | 1.5 | 1.3 |
| UFBA 8466 | 1 | 26.2 | 7.2 | 8.4 | 2.8 | 1.9 | 1.1 | 2.6 | 3.3 | 1.8 | 9.3 | 7.1 | 6.9 | 8.7 | 14.1 | 15.3 | 20.2 | 1.3 | 1.3 |
| UFBA 8467 | 1 | 26.4 | 7.9 | 8.5 | 2.9 | 2.3 | 1.1 | 2.9 | 3.5 | 1.9 | 9.3 | 7.7 | 6.0 | 8.3 | 12.9 | 13.8 | 19.6 | 1.4 | 1.5 |
| UFBA 8468 | 1 | 28.0 | 8.5 | 8.7 | 3.1 | 2.3 | 1.3 | 2.8 | 3.9 | 2.0 | 10.3 | 4.5 | 6.5 | 9.1 | 13.5 | 15.1 | 20.8 | 1.4 | 1.2 |
| UFBA 8469 | 1 | 27.4 | 8.3 | 8.6 | 2.9 | 2.3 | 1.3 | 2.7 | 3.6 | 1.9 | 10.3 | 6.6 | 6.8 | 8.8 | 13.5 | 15.0 | 20.7 | 1.5 | 1.4 |
| UFBA 8470 | 2 | 35.3 | 10.7 | 11.1 | 3.4 | 2.8 | 2.3 | 3.2 | 3.9 | 2.5 | 12.4 | 8.3 | 8.3 | 10.9 | 16.7 | 18.5 | 26.4 | 2.2 | 2.1 |
| UFBA 8471 | 2 | 33.4 | 9.6 | 10.6 | 3.3 | 2.4 | 1.6 | 2.9 | 4.1 | 2.2 | 10.3 | 9.1 | 8.0 | 11.0 | 16.1 | 17.0 | 24.6 | 2.1 | 1.6 |
| UFBA 8472 | 2 | 36.2 | 10.1 | 11.2 | 3.5 | 2.8 | 1.5 | 3.3 | 4.0 | 2.1 | 10.3 | 9.2 | 8.6 | 11.3 | 17.1 | 18.4 | 26.0 | 2.1 | 1.3 |
| UFBA 8473 | 2 | 36.6 | 9.9 | 10.5 | 3.3 | 2.7 | 1.9 | 3.3 | 3.8 | 2.3 | 11.3 | 8.3 | 8.0 | 10.8 | 16.2 | 17.4 | 24.9 | 1.9 | 1.6 |
| UFBA 8474 | 1 | 26.7 | 7.7 | 8.0 | 2.8 | 2.4 | 1.1 | 2.9 | 3.1 | 1.8 | 8.2 | 6.9 | 6.3 | 8.8 | 13.2 | 13.8 | 19.3 | 1.3 | 1.1 |
| UFBA 8475 | 2 | 34.7 | 10.5 | 10.8 | 3.2 | 2.8 | 1.6 | 2.7 | 4.8 | 2.4 | 11.3 | 9.3 | 8.3 | 10.9 | 16.5 | 17.7 | 26.1 | 1.9 | 1.8 |
| UFBA 8476 | 2 | 35.2 | 11.1 | 10.8 | 3.6 | 2.8 | 2.0 | 2.7 | 4.3 | 2.2 | 11.3 | 9.5 | 8.6 | 11.5 | 17.2 | 19.0 | 27.0 | 2.2 | 2.1 |
| UFBA 8477 | 2 | 34.9 | 10.1 | 11.2 | 3.3 | 2.8 | 1.8 | 3.0 | 4.3 | 2.2 | 10.3 | 8.8 | 8.4 | 10.5 | 16.7 | 17.9 | 25.5 | 2.1 | 1.9 |
| UFBA 8478 | 2 | 33.7 | 9.8 | 10.4 | 3.3 | 2.6 | 1.6 | 2.6 | 4.1 | 2.1 | 11.3 | 8.4 | 8.2 | 11.5 | 15.7 | 17.2 | 24.6 | 2.2 | 2.0 |
| UFBA 8479 | 1 | 27.0 | 8.4 | 8.5 | 2.9 | 2.2 | 1.5 | 2.6 | 3.5 | 2.1 | 10.3 | 7.2 | 7.1 | 8.8 | 14.1 | 14.9 | 20.9 | 1.4 | 1.3 |
| UFBA 8480 | 1 | 26.0 | 7.2 | 8.1 | 2.9 | 2.2 | 1.2 | 2.4 | 3.2 | 1.5 | 7.2 | 6.7 | 6.3 | 9.0 | 13.3 | 13.6 | 19.6 | 1.5 | 1.4 |
| UFBA 8481 | 1 | 27.1 | 7.9 | 8.4 | 2.8 | 2.3 | 1.1 | 2.6 | 3.6 | 2.0 | 9.3 | 7.4 | 6.7 | 8.7 | 14.0 | 14.6 | 20.4 | 1.5 | 1.3 |
| UFBA 8482 | 1 | 25.3 | 7.7 | 8.5 | 2.8 | 2.0 | 1.2 | 2.3 | 3.6 | 1.9 | 9.3 | 7.3 | 6.5 | 8.7 | 12.9 | 13.8 | 19.5 | 1.3 | 1.2 |
| UFBA 8483 | 1 | 28.5 | 8.3 | 8.9 | 3.2 | 2.1 | 1.2 | 2.9 | 3.5 | 1.8 | 7.2 | 7.7 | 6.9 | 8.8 | 14.2 | 15.0 | 20.8 | 1.5 | 1.4 |
| UFBA 8484 | 1 | 27.4 | 8.6 | 8.4 | 3.1 | 2.1 | 1.4 | 3.1 | 3.4 | 1.9 | 8.2 | 7.4 | 6.9 | 8.6 | 13.3 | 14.3 | 20.7 | 1.3 | 1.3 |
| UFBA 6673 | 1 | 29.0 | 9.2 | 9.1 | 3.2 | 2.2 | 1.3 | 2.3 | 3.5 | 2.2 | 1.1 | 8.6 | 6.9 | 9.0 | 14.9 | 15.6 | 20.0 | 1.4 | 1.2 |
| MZUSP 137960 | 1 | 27.3 | 8.5 | 8.4 | 4.0 | 2.9 | 1.5 | 3.0 | 4.3 | 2.5 | 1.1 | 7.9 | 5.6 | 7.9 | 14.0 | 14.6 | 20.5 | 1.4 | 1.4 |
| MHNCI 2470 | 1 | 28.9 | 8.6 | 8.6 | 3.1 | 2.2 | 1.4 | 2.7 | 3.8 | 2.1 | 1.1 | 7.8 | 6.5 | 9.0 | 14.3 | 15.2 | 21.5 | 1.5 | 1.3 |
| MZUSP 38032 | 2 | 32.4 | 9.7 | 10.1 | 3.5 | 3.6 | 1.6 | 3.0 | 4.1 | 2.5 | 1.4 | 8.8 | 7.9 | 9.8 | 15.7 | 17.6 | 24.4 | 2.1 | 2.0 |
| MZUSP 81131 | 1 | 23.5 | 7.3 | 7.8 | 3.6 | 2.8 | 1.6 | 2.9 | 3.9 | 2.0 | 1.0 | 7.3 | 5.7 | 8.0 | 12.3 | 13.1 | 18.1 | 1.6 | 1.5 |
| MZUSP 81132 | 1 | 26.1 | 8.0 | 9.0 | 3.8 | 3.4 | 1.6 | 3.8 | 4.5 | 2.5 | 1.1 | 8.2 | 6.0 | 8.0 | 13.4 | 14.2 | 18.6 | 1.8 | 1.8 |
| MNRJ 51726 | 1 | 25.3 | 8.6 | 8.3 | 2.9 | 2.5 | 1.4 | 2.5 | 3.6 | 2.0 | 0.9 | 7.4 | 6.0 | 8.4 | 13.2 | 13.9 | 19.7 | 1.2 | 1.2 |
| MNRJ 43518 | 1 | 25.0 | 7.8 | 8.2 | 3.0 | 2.3 | 1.4 | 2.2 | 3.3 | 1.8 | 0.9 | 7.2 | 5.5 | 8.0 | 12.3 | 13.4 | 18.8 | 1.4 | 1.3 |
| MZUSP 300 | 2 | 28.7 | 8.8 | 9.3 | 4.0 | 3.5 | 1.3 | 3.5 | 4.8 | 2.8 | 1.4 | 8.6 | 7.1 | 9.9 | 14.6 | 16.0 | 23.1 | 2.1 | 2.0 |
| MZUSP 135139 | 1 | 27.9 | 8.5 | 8.5 | 3.9 | 2.9 | 1.5 | 2.6 | 4.1 | 2.5 | 1.3 | 7.9 | 6.4 | 7.6 | 13.5 | 14.5 | 18.7 | 1.5 | 1.3 |
| MZUSP 135140 | 1 | 25.9 | 8.1 | 8.2 | 3.8 | 2.9 | 1.1 | 3.1 | 4.3 | 2.1 | 1.3 | 7.2 | 6.1 | 6.8 | 12.8 | 13.3 | 17.4 | 1.6 | 1.3 |
| MZUSP 135141 | 1 | 26.0 | 7.8 | 9.6 | 3.8 | 3.0 | 1.4 | 3.0 | 3.8 | 2.1 | 1.0 | 8.5 | 6.9 | 8.8 | 13.5 | 15.1 | 20.1 | 1.6 | 1.3 |
| MZUSP 135142 | 1 | 23.8 | 7.7 | 7.9 | 3.6 | 2.9 | 1.0 | 3.3 | 3.8 | 1.8 | 0.9 | 7.3 | 6.2 | 7.1 | 12.9 | 13.6 | 18.9 | 1.4 | 1.4 |
| MZUSP 65258 | 1 | 27.0 | 8.0 | 8.7 | 4.3 | 2.9 | 1.4 | 3.3 | 4.4 | 2.6 | 1.4 | 7.9 | 6.6 | 8.7 | 13.1 | 13.8 | 19.7 | 2.0 | 1.5 |
| MZUSP 65259 | 1 | 26.5 | 8.7 | 9.2 | 3.6 | 2.9 | 1.5 | 3.0 | 4.1 | 2.5 | 1.3 | 8.3 | 5.9 | 8.5 | 13.8 | 14.9 | 20.2 | 2.0 | 1.9 |
| MZUSP 65260 | 1 | 25.3 | 8.0 | 9.0 | 3.8 | 2.8 | 1.0 | 3.0 | 3.5 | 2.3 | 1.0 | 7.7 | 5.9 | 8.3 | 12.9 | 13.7 | 20.2 | 1.5 | 1.4 |
| MZUSP 7793 | 2 | 30.5 | 10.1 | 10.5 | 4.0 | 3.3 | 1.8 | 3.0 | 5.1 | 2.9 | 1.0 | 9.3 | 6.8 | 10.9 | 16.0 | 18.8 | 25.3 | 2.0 | 1.6 |
| MZUSP 95600 | 2 | 39.1 | 11.2 | 11.4 | 4.1 | 4.0 | 1.6 | 4.0 | 5.9 | 3.0 | 1.6 | 10.9 | 8.3 | 11.8 | 19.9 | 20.2 | 29.8 | 2.6 | 2.3 |
| MZUSP 95601 | 2 | 35.5 | 10.1 | 11.2 | 3.9 | 3.9 | 1.8 | 3.4 | 4.5 | 3.1 | 1.6 | 10.0 | 8.2 | 10.7 | 18.0 | 19.5 | 26.7 | 2.3 | 2.0 |
| MZUSP 95602 | 2 | 31.5 | 10.9 | 11.3 | 4.5 | 4.0 | 2.1 | 4.5 | 4.5 | 3.1 | 1.5 | 10.4 | 9.0 | 11.4 | 18.6 | 19.0 | 27.3 | 2.5 | 2.1 |
| MZUSP 95603 | 1 | 31.6 | 9.1 | 10.1 | 4.1 | 3.6 | 1.4 | 3.8 | 4.1 | 2.8 | 1.4 | 9.1 | 7.0 | 9.6 | 16.1 | 16.5 | 23.2 | 2.1 | 1.8 |
| MZUSP 95604 | 1 | 29.8 | 8.9 | 10.0 | 4.0 | 3.5 | 1.5 | 3.5 | 4.5 | 3.0 | 1.5 | 8.4 | 7.3 | 8.6 | 14.8 | 15.8 | 22.4 | 2.0 | 2.0 |
| MZUSP 95605 | 1 | 28.5 | 9.4 | 9.8 | 3.8 | 3.4 | 1.6 | 3.4 | 5.1 | 2.4 | 1.4 | 8.3 | 7.4 | 22.2 | 14.7 | 16.1 | 22.0 | 2.0 | 2.0 |
| MZUSP 95606 | 1 | 31.2 | 9.9 | 10.6 | 4.0 | 3.9 | 1.9 | 3.6 | 4.6 | 2.8 | 1.4 | 9.3 | 7.1 | 10.4 | 15.8 | 17.0 | 24.6 | 2.1 | 2.0 |
| MZUSP 95607 | 1 | 29.5 | 9.3 | 9.3 | 4.3 | 3.3 | 1.5 | 3.5 | 4.6 | 2.8 | 1.4 | 8.4 | 6.8 | 8.7 | 14.1 | 15.9 | 22.3 | 2.4 | 2.1 |
| MZUSP 95608 | 1 | 30.4 | 9.1 | 9.8 | 3.9 | 3.6 | 1.1 | 3.6 | 4.5 | 2.8 | 1.4 | 8.4 | 6.9 | 8.7 | 15.7 | 16.6 | 22.6 | 1.8 | 1.9 |
| MZUSP 95609 | 1 | 28.5 | 9.1 | 9.9 | 3.6 | 3.5 | 1.3 | 3.1 | 4.9 | 2.5 | 1.1 | 8.3 | 6.3 | 8.8 | 14.8 | 16.0 | 21.3 | 1.8 | 1.6 |
| MZUSP 95610 | 1 | 22.8 | 9.6 | 10.5 | 4.4 | 3.3 | 1.9 | 3.4 | 4.9 | 3.1 | 1.8 | 9.1 | 7.7 | 9.8 | 15.7 | 16.5 | 23.1 | 2.3 | 1.9 |
| MZUSP 95611 | 1 | 30.2 | 9.8 | 9.8 | 3.6 | 3.4 | 1.9 | 3.4 | 4.9 | 2.6 | 1.3 | 8.7 | 7.1 | 9.6 | 15.9 | 16.8 | 21.8 | 2.0 | 1.9 |
| MZUSP 95612 | 1 | 29.4 | 9.4 | 9.9 | 3.5 | 3.4 | 1.8 | 3.3 | 5.0 | 2.8 | 1.4 | 8.9 | 7.5 | 10.1 | 15.2 | 16.6 | 23.9 | 2.0 | 1.8 |
| MZUSP 95613 | 1 | 28.7 | 8.7 | 9.6 | 4.4 | 3.4 | 1.8 | 3.1 | 4.6 | 2.9 | 1.5 | 8.5 | 6.9 | 9.8 | 15.0 | 16.0 | 22.5 | 1.9 | 1.9 |
| MZUSP 95614 | 1 | 29.6 | 9.3 | 10.1 | 3.8 | 3.5 | 1.8 | 3.3 | 5.1 | 2.9 | 1.5 | 8.8 | 7.4 | 10.0 | 15.4 | 16.9 | 23.1 | 1.9 | 1.8 |
| MZUSP 95615 | 1 | 27.6 | 8.8 | 9.5 | 3.8 | 3.1 | 1.9 | 3.1 | 4.3 | 2.6 | 1.1 | 8.3 | 6.9 | 9.3 | 14.2 | 15.2 | 21.9 | 1.6 | 1.6 |
| MZUSP 95616 | 1 | 30.6 | 9.1 | 9.7 | 3.8 | 3.3 | 1.5 | 3.1 | 4.9 | 3.0 | 1.6 | 8.4 | 7.1 | 9.2 | 15.7 | 16.2 | 23.2 | 2.1 | 2.0 |
| MZUSP 95617 | 1 | 29.1 | 9.3 | 9.5 | 3.6 | 3.1 | 1.5 | 3.0 | 4.5 | 2.5 | 1.3 | 8.2 | 7.0 | 9.3 | 14.4 | 15.2 | 21.7 | 1.8 | 1.6 |
| MZUSP 95618 | 1 | 30.4 | 9.4 | 10.2 | 4.0 | 3.6 | 1.3 | 3.9 | 5.0 | 2.8 | 1.5 | 9.1 | 7.3 | 9.9 | 16.3 | 17.6 | 23.8 | 2.3 | 1.9 |
| MZUSP 95619 | 1 | 28.7 | 9.0 | 10.1 | 3.8 | 3.1 | 1.4 | 3.5 | 4.9 | 2.8 | 1.5 | 8.1 | 7.4 | 9.1 | 15.0 | 16.0 | 22.2 | 1.8 | 1.9 |
| MZUSP 95620 | 1 | 31.9 | 10.2 | 10.4 | 4.4 | 3.3 | 1.6 | 4.3 | 3.9 | 2.8 | 1.4 | 8.2 | 7.5 | 9.6 | 16.6 | 16.6 | 23.9 | 2.0 | 1.9 |
| MZUSP 118010 | 2 | 32.3 | 10.6 | 10.7 | 3.5 | 3.0 | 1.4 | 2.6 | 4.0 | 2.1 | 1.0 | 10.2 | 7.7 | 10.8 | 16.6 | 18.8 | 25.5 | 1.3 | 1.3 |
| MZUSP 95739 | 2 | 36.2 | 11.0 | 10.9 | 3.4 | 3.3 | 1.5 | 2.6 | 4.6 | 2.5 | 1.4 | 9.6 | 7.8 | 10.9 | 17.3 | 18.5 | 24.8 | 1.9 | 1.6 |
| MZUSP 9726 | 1 | 27.2 | 7.4 | 8.1 | 3.5 | 3.1 | 1.4 | 3.3 | 4.0 | 2.6 | 1.4 | 7.8 | 6.4 | 8.9 | 13.0 | 14.0 | 19.2 | 1.6 | 1.3 |
| MZUSP 9727 | 1 | 25.3 | 6.7 | 8.4 | 3.3 | 2.8 | 1.8 | 2.9 | 3.5 | 2.3 | 1.3 | 7.5 | 6.3 | 7.8 | 12.7 | 14.1 | 19.8 | 1.1 | 1.0 |
| MZUSP 9723 | 1 | 26.7 | 8.1 | 8.3 | 2.9 | 2.6 | 1.1 | 2.3 | 3.0 | 1.9 | 0.9 | 7.9 | 5.9 | 9.1 | 13.5 | 14.1 | 19.6 | 1.3 | 1.3 |
| MNRJ 37292 | 2 | 32.0 | 9.9 | 9.5 | 3.5 | 3.0 | 1.4 | 3.1 | 4.8 | 3.0 | 1.6 | 9.2 | 7.4 | 11.0 | 16.1 | 17.6 | 24.5 | 2.0 | 1.4 |
| MZUSP 137920 | 2 | 26.6 | 8.1 | 8.6 | 3.0 | 2.1 | 1.0 | 2.4 | 3.1 | 1.9 | 1.0 | 7.8 | 6.3 | 8.1 | 13.4 | 14.2 | 18.9 | 1.6 | 1.5 |
| MZUSP 136235 | 1 | 24.9 | 7.8 | 7.9 | 2.6 | 2.1 | 1.0 | 2.4 | 2.9 | 1.9 | 0.9 | 7.3 | 6.3 | 7.3 | 12.7 | 13.2 | 18.3 | 1.5 | 1.4 |
| MZUSP 136236 | 1 | 26.3 | 7.7 | 8.7 | 3.0 | 2.3 | 1.3 | 2.8 | 3.1 | 2.1 | 1.0 | 7.8 | 6.2 | 8.1 | 12.9 | 13.8 | 19.8 | 1.5 | 1.4 |
| MZUSP 136237 | 1 | 28.1 | 7.5 | 8.8 | 3.0 | 2.5 | 1.3 | 2.9 | 3.3 | 2.0 | 1.0 | 7.4 | 6.7 | 8.0 | 13.5 | 14.3 | 19.3 | 1.3 | 1.4 |
| MZUSP 136238 | 1 | 26.3 | 7.9 | 8.2 | 2.8 | 2.1 | 1.0 | 2.6 | 2.8 | 1.9 | 0.9 | 7.4 | 6.5 | 8.4 | 12.5 | 13.4 | 19.3 | 1.4 | 1.4 |
| MZUSP 139059 | 1 | 25.7 | 8.2 | 8.0 | 3.0 | 2.1 | 1.3 | 2.8 | 3.1 | 2.0 | 0.9 | 7.4 | 6.1 | 8.8 | 12.7 | 13.7 | 19.1 | 1.3 | 1.3 |
| MZUSP 139060 | 1 | 24.0 | 7.5 | 7.6 | 2.9 | 1.9 | 0.9 | 2.5 | 3.0 | 1.9 | 0.9 | 6.9 | 5.9 | 8.2 | 11.6 | 12.4 | 18.0 | 1.1 | 1.0 |
| MZUSP 139061 | 1 | 24.7 | 7.7 | 7.9 | 3.0 | 2.3 | 1.3 | 3.0 | 3.1 | 1.8 | 0.9 | 7.3 | 5.9 | 7.8 | 12.3 | 13.0 | 18.8 | 1.3 | 1.0 |
| MZUSP 64718 | 2 | 31.2 | 9.8 | 10.3 | 3.6 | 2.5 | 1.4 | 3.0 | 4.0 | 2.4 | 1.0 | 9.2 | 7.6 | 10.7 | 12.8 | 17.0 | 23.8 | 1.1 | 1.3 |
| MZUSP 84543 | 1 | 25.2 | 8.0 | 8.8 | 3.0 | 2.3 | 1.3 | 2.5 | 2.9 | 1.9 | 0.8 | 7.2 | 6.8 | 8.4 | 12.6 | 14.2 | 20.0 | 1.5 | 1.5 |
| MZUSP 84544 | 1 | 26.0 | 7.9 | 8.1 | 3.1 | 2.3 | 1.0 | 2.5 | 3.5 | 2.1 | 1.0 | 7.4 | 6.7 | 8.4 | 12.1 | 14.4 | 19.4 | 1.6 | 1.6 |
| MZUSP 84545 | 1 | 25.5 | 7.5 | 8.3 | 3.0 | 2.1 | 1.4 | 2.6 | 3.0 | 1.9 | 0.8 | 7.0 | 5.6 | 8.1 | 12.4 | 13.3 | 19.5 | 1.5 | 1.4 |
| MZUSP 84546 | 1 | 25.7 | 8.2 | 8.4 | 3.1 | 2.4 | 1.4 | 2.6 | 2.9 | 2.0 | 1.0 | 7.2 | 6.4 | 8.2 | 12.8 | 13.7 | 18.9 | 1.5 | 1.4 |
| MZUSP 134878 | 1 | 26.7 | 7.8 | 8.0 | 2.9 | 2.1 | 1.0 | 2.0 | 3.3 | 2.0 | 1.0 | 7.7 | 6.7 | 8.2 | 13.8 | 14.1 | 18.8 | 1.4 | 1.1 |
| MZUSP 134879 | 2 | 25.9 | 7.8 | 8.0 | 2.8 | 2.0 | 1.3 | 2.3 | 3.1 | 2.0 | 0.8 | 7.7 | 6.3 | 7.6 | 12.6 | 13.1 | 18.3 | 1.3 | 1.1 |
| MZUSP 131981 | 1 | 25.4 | 7.2 | 8.0 | 2.6 | 2.0 | 1.0 | 2.4 | 3.3 | 2.0 | 0.9 | 7.3 | 6.4 | 7.4 | 12.4 | 13.5 | 18.7 | 1.0 | 0.9 |
| MZUSP 131982 | 1 | 24.9 | 6.8 | 7.5 | 2.6 | 1.9 | 1.0 | 2.5 | 3.0 | 1.8 | 0.9 | 7.0 | 5.7 | 7.8 | 12.0 | 12.8 | 17.7 | 1.4 | 1.1 |
| MZUSP 131983 | 1 | 24.3 | 7.5 | 7.3 | 2.6 | 2.0 | 1.1 | 2.3 | 3.0 | 1.8 | 0.9 | 5.9 | 5.5 | 7.8 | 11.9 | 12.5 | 17.6 | 1.3 | 1.0 |
| MZUSP 131984 | 1 | 25.0 | 7.9 | 7.7 | 2.6 | 2.3 | 1.0 | 2.0 | 3.3 | 1.9 | 0.9 | 7.3 | 5.7 | 7.7 | 12.0 | 12.6 | 17.7 | 1.3 | 1.1 |
| MZUSP 131985 | 2 | 27.7 | 8.7 | 9.3 | 2.9 | 2.6 | 1.4 | 2.5 | 3.9 | 2.0 | 1.0 | 8.2 | 6.6 | 9.5 | 13.9 | 14.7 | 22.1 | 1.5 | 1.4 |
| MZUSP 93338 | 2 | 34.6 | 10.4 | 11.3 | 3.6 | 2.8 | 1.6 | 3.0 | 4.6 | 2.6 | 1.1 | 10.3 | 7.9 | 11.5 | 17.4 | 19.9 | 26.7 | 2.3 | 2.1 |
| MZUSP 117612 | 1 | 27.6 | 8.4 | 9.2 | 3.0 | 2.3 | 1.1 | 2.6 | 3.0 | 1.9 | 1.0 | 8.0 | 6.8 | 8.5 | 13.7 | 14.7 | 20.7 | 1.6 | 1.4 |
| MZUSP 117613 | 1 | 27.5 | 8.4 | 8.8 | 3.0 | 2.4 | 1.3 | 2.5 | 3.6 | 2.0 | 1.0 | 8.0 | 6.6 | 8.6 | 14.2 | 14.4 | 20.4 | 1.4 | 1.4 |
| MZUSP 117614 | 1 | 28.1 | 8.4 | 9.0 | 2.9 | 2.3 | 1.3 | 2.6 | 2.9 | 1.9 | 1.0 | 7.9 | 6.7 | 8.8 | 14.1 | 14.6 | 20.5 | 1.4 | 1.3 |
| MZUSP 117615 | 1 | 26.7 | 8.4 | 8.9 | 3.0 | 2.3 | 1.3 | 2.5 | 3.5 | 2.0 | 1.0 | 8.3 | 5.9 | 8.6 | 14.0 | 15.1 | 21.5 | 1.4 | 1.4 |
| MZUSP 117616 | 2 | 32.3 | 10.2 | 10.2 | 3.1 | 2.8 | 1.5 | 2.5 | 4.5 | 2.4 | 1.4 | 9.5 | 7.9 | 10.7 | 16.9 | 18.1 | 25.1 | 1.9 | 1.6 |
| MZUSP 117617 | 2 | 33.8 | 10.4 | 10.6 | 3.3 | 2.8 | 1.5 | 2.8 | 4.6 | 2.4 | 1.3 | 10.2 | 7.6 | 11.2 | 16.9 | 18.1 | 25.9 | 1.9 | 1.6 |
| MZUSP 117618 | 1 | 27.7 | 8.4 | 8.6 | 3.1 | 2.4 | 1.1 | 2.8 | 3.4 | 2.0 | 1.0 | 8.2 | 6.7 | 9.0 | 13.7 | 14.7 | 20.8 | 2.1 | 1.5 |
| MZUSP 117619 | 1 | 26.9 | 8.2 | 8.8 | 2.9 | 2.3 | 1.3 | 2.4 | 3.6 | 2.1 | 1.0 | 7.7 | 6.2 | 9.1 | 13.1 | 14.1 | 20.6 | 1.4 | 1.3 |
| MZUSP 117620 | 1 | 26.3 | 8.2 | 8.4 | 2.9 | 2.3 | 1.4 | 2.6 | 3.1 | 2.0 | 1.0 | 7.8 | 6.4 | 8.1 | 12.9 | 14.1 | 19.8 | 1.4 | 1.3 |
| MZUSP 117621 | 1 | 27.4 | 8.2 | 8.5 | 2.9 | 2.3 | 1.3 | 2.4 | 3.6 | 2.1 | 1.1 | 7.8 | 6.3 | 8.8 | 13.9 | 14.5 | 20.1 | 1.4 | 1.3 |
| MZUSP 117622 | 1 | 28.0 | 8.7 | 9.4 | 2.9 | 2.5 | 1.3 | 2.6 | 3.9 | 2.0 | 1.0 | 8.2 | 6.7 | 9.0 | 13.9 | 14.8 | 21.1 | 1.4 | 1.4 |
| MZUSP 117623 | 1 | 27.7 | 8.6 | 8.7 | 3.0 | 2.6 | 1.3 | 2.5 | 3.5 | 1.9 | 1.1 | 7.8 | 6.5 | 8.7 | 13.8 | 15.1 | 21.2 | 1.4 | 1.3 |
| MZUSP 117624 | 1 | 27.1 | 8.6 | 8.8 | 3.0 | 2.3 | 1.3 | 2.8 | 3.4 | 2.0 | 1.1 | 7.8 | 6.5 | 8.8 | 13.5 | 14.6 | 20.1 | 1.5 | 1.4 |
| MZUSP 117625 | 1 | 27.5 | 8.7 | 9.1 | 3.0 | 2.3 | 1.3 | 2.8 | 3.5 | 2.4 | 1.0 | 8.0 | 6.6 | 9.0 | 14.3 | 15.0 | 21.4 | 1.4 | 1.3 |
| MZUSP 117626 | 1 | 26.2 | 7.9 | 8.3 | 3.0 | 2.0 | 1.3 | 2.1 | 3.8 | 2.0 | 1.1 | 7.8 | 6.6 | 8.4 | 13.0 | 14.4 | 20.2 | 1.4 | 1.3 |
| MZUSP 117627 | 1 | 26.7 | 7.9 | 8.6 | 3.0 | 2.3 | 1.3 | 2.5 | 3.5 | 2.0 | 1.0 | 7.5 | 5.8 | 8.3 | 13.2 | 14.5 | 19.7 | 1.4 | 1.3 |
| MZUSP 117628 | 1 | 27.3 | 8.7 | 9.0 | 2.9 | 2.4 | 1.4 | 2.5 | 3.5 | 2.0 | 1.1 | 8.1 | 6.3 | 9.1 | 14.4 | 15.3 | 21.0 | 1.4 | 1.3 |
| MZUSP 117629 | 1 | 27.8 | 8.8 | 8.9 | 3.1 | 2.3 | 1.3 | 2.6 | 3.5 | 2.0 | 1.1 | 8.2 | 7.2 | 8.9 | 14.1 | 15.0 | 20.0 | 1.4 | 1.3 |
| MZUSP 117630 | 1 | 26.2 | 8.3 | 8.1 | 2.8 | 2.3 | 1.3 | 2.5 | 3.3 | 2.0 | 0.9 | 7.7 | 6.3 | 8.5 | 13.5 | 14.1 | 19.4 | 1.4 | 1.3 |
| MZUSP 117631 | 1 | 26.0 | 7.7 | 8.4 | 2.8 | 2.3 | 1.3 | 2.5 | 3.3 | 2.0 | 1.0 | 7.6 | 6.6 | 8.3 | 13.3 | 14.4 | 19.7 | 1.4 | 1.3 |
| MZUSP 117632 | 1 | 27.1 | 8.2 | 8.6 | 2.9 | 2.4 | 1.1 | 2.5 | 3.1 | 2.0 | 1.0 | 8.0 | 6.0 | 8.7 | 13.8 | 14.7 | 20.3 | 1.4 | 1.3 |
| MZUSP 117633 | 1 | 27.6 | 8.5 | 8.8 | 3.0 | 2.4 | 1.3 | 2.4 | 3.4 | 2.1 | 1.0 | 7.7 | 6.2 | 9.1 | 13.5 | 14.5 | 20.7 | 1.4 | 1.4 |
| MZUSP 117634 | 1 | 27.2 | 8.6 | 9.1 | 3.1 | 2.1 | 1.3 | 2.5 | 3.6 | 2.0 | 1.1 | 7.8 | 6.3 | 8.0 | 13.6 | 14.6 | 20.2 | 1.5 | 1.4 |
| MZUSP 117635 | 1 | 26.7 | 8.5 | 8.6 | 3.0 | 2.4 | 1.3 | 2.4 | 3.5 | 2.0 | 1.1 | 7.6 | 6.4 | 8.9 | 13.4 | 13.8 | 19.2 | 1.5 | 1.3 |
| MZUSP 117636 | 1 | 27.4 | 8.5 | 8.4 | 2.9 | 2.4 | 1.3 | 2.5 | 3.5 | 1.9 | 1.0 | 7.8 | 6.6 | 9.0 | 13.9 | 14.7 | 20.6 | 1.4 | 1.4 |
| MZUSP 117637 | 1 | 26.2 | 8.1 | 8.7 | 3.1 | 2.3 | 1.1 | 3.1 | 3.4 | 2.0 | 1.0 | 7.5 | 6.8 | 8.6 | 13.4 | 14.3 | 19.9 | 1.5 | 1.3 |
| MZUSP 117638 | 1 | 28.5 | 8.5 | 8.9 | 2.9 | 2.5 | 1.1 | 2.5 | 3.6 | 2.1 | 1.0 | 8.0 | 6.7 | 8.7 | 14.1 | 14.7 | 21.2 | 1.3 | 1.3 |
| MZUSP 117639 | 1 | 27.8 | 8.7 | 9.0 | 2.9 | 2.6 | 1.4 | 2.5 | 3.4 | 2.1 | 1.1 | 8.0 | 6.3 | 8.5 | 13.6 | 14.9 | 20.9 | 1.6 | 1.4 |
| MZUSP 117640 | 1 | 27.5 | 8.7 | 8.8 | 3.3 | 2.4 | 1.1 | 2.8 | 3.1 | 1.8 | 1.0 | 7.9 | 6.9 | 9.0 | 13.9 | 15.2 | 20.5 | 1.4 | 1.3 |
| MZUSP 77074 | 2 | 31.1 | 10.8 | 10.5 | 2.9 | 3.0 | 2.0 | 3.5 | 3.8 | 2.4 | 1.8 | 8.5 | 6.5 | 9.3 | 14.3 | 15.2 | 19.5 | 1.3 | 1.3 |
| MZUSP 77075 | 2 | 35.0 | 11.5 | 11.6 | 3.6 | 3.4 | 2.3 | 3.6 | 4.8 | 2.6 | 1.5 | 10.2 | 8.1 | 10.7 | 15.4 | 18.3 | 22.4 | 1.8 | 1.6 |
| MZUSP 77076 | 2 | 30.7 | 10.2 | 9.8 | 3.1 | 3.0 | 1.9 | 2.9 | 3.8 | 2.3 | 1.4 | 8.0 | 6.6 | 8.5 | 13.9 | 14.7 | 18.1 | 1.5 | 1.3 |
| MZUSP 77077 | 2 | 33.3 | 10.4 | 11.5 | 3.5 | 2.6 | 1.0 | 2.9 | 4.3 | 2.4 | 1.3 | 8.8 | 7.5 | 11.6 | 16.7 | 17.8 | 25.4 | 2.1 | 2.0 |
| MZUSP 77078 | 2 | 32.1 | 10.5 | 10.5 | 3.8 | 3.4 | 2.0 | 3.3 | 3.4 | 2.4 | 1.4 | 8.5 | 6.7 | 9.2 | 15.2 | 16.3 | 19.9 | 1.9 | 1.6 |
| MZUSP 9646 | 1 | 27.4 | 8.5 | 8.4 | 3.4 | 2.1 | 1.4 | 2.5 | 3.3 | 1.9 | 0.9 | 7.6 | 6.8 | 7.9 | 11.1 | 13.1 | 19.1 | 1.4 | 1.1 |
| MZUSP 9647 | 1 | 25.5 | 7.8 | 7.9 | 2.8 | 2.0 | 1.4 | 2.3 | 3.0 | 2.0 | 0.9 | 7.4 | 6.6 | 8.6 | 12.7 | 14.8 | 19.5 | 1.3 | 1.0 |
| MZUSP 136707 | 1 | 23.5 | 7.8 | 7.6 | 2.4 | 2.0 | 1.0 | 2.0 | 3.3 | 1.9 | 1.0 | 7.0 | 5.8 | 7.5 | 12.1 | 12.7 | 17.2 | 1.3 | 1.1 |
| MZUSP 136708 | 1 | 25.2 | 8.3 | 8.3 | 2.8 | 2.3 | 1.1 | 2.4 | 3.4 | 1.8 | 0.9 | 7.3 | 6.1 | 8.5 | 12.2 | 12.9 | 17.9 | 1.4 | 1.4 |
| MZUSP 136709 | 1 | 24.6 | 8.3 | 8.3 | 2.5 | 2.0 | 1.1 | 2.1 | 3.3 | 2.0 | 1.0 | 7.3 | 6.1 | 8.0 | 12.7 | 13.1 | 18.1 | 1.1 | 1.1 |
| MZUSP 125385 | 1 | 25.6 | 7.6 | 8.1 | 2.8 | 2.1 | 1.3 | 2.1 | 3.4 | 1.9 | 0.9 | 7.2 | 5.9 | 7.9 | 12.4 | 13.2 | 18.3 | 1.4 | 1.1 |
| MZUSP 125386 | 1 | 27.8 | 8.5 | 8.7 | 3.1 | 2.1 | 1.4 | 2.6 | 3.4 | 2.0 | 1.0 | 8.2 | 6.2 | 8.6 | 13.6 | 14.5 | 20.1 | 1.4 | 1.4 |
| MZUSP 125387 | 1 | 28.6 | 8.7 | 8.9 | 3.3 | 2.3 | 1.3 | 2.5 | 3.8 | 2.1 | 1.0 | 8.1 | 6.3 | 9.3 | 14.4 | 15.2 | 20.4 | 1.5 | 1.4 |
| MZUSP 125388 | 1 | 27.4 | 8.2 | 9.0 | 3.0 | 2.4 | 1.1 | 2.5 | 3.6 | 1.9 | 1.0 | 7.6 | 6.3 | 8.0 | 13.2 | 14.0 | 18.7 | 1.4 | 1.3 |
| MZUSP 125389 | 1 | 27.1 | 8.2 | 8.4 | 2.9 | 2.4 | 1.1 | 2.3 | 3.5 | 1.8 | 1.0 | 7.3 | 6.4 | 8.5 | 12.9 | 14.0 | 19.1 | 1.5 | 1.3 |
| MZUSP 125390 | 1 | 28.0 | 8.4 | 8.1 | 3.0 | 2.1 | 1.3 | 2.4 | 3.5 | 2.0 | 1.0 | 7.9 | 6.5 | 7.9 | 13.9 | 14.4 | 20.0 | 1.1 | 1.3 |
| MZUSP 125391 | 1 | 27.0 | 8.0 | 8.5 | 2.9 | 2.3 | 1.4 | 2.3 | 3.4 | 2.0 | 0.9 | 7.8 | 6.0 | 8.4 | 13.6 | 14.3 | 20.0 | 1.1 | 1.1 |
| MZUSP 125392 | 1 | 27.1 | 8.3 | 8.7 | 3.0 | 2.3 | 1.3 | 2.6 | 3.6 | 2.0 | 0.9 | 7.5 | 6.3 | 8.5 | 13.7 | 14.1 | 19.7 | 1.4 | 1.3 |
| MZUSP 51656 | 1 | 28.4 | 8.8 | 8.6 | 3.3 | 2.5 | 1.4 | 2.5 | 3.8 | 1.9 | 1.0 | 7.8 | 6.1 | 9.2 | 14.2 | 15.0 | 21.4 | 1.5 | 1.3 |
| MZUSP 51657 | 1 | 28.3 | 8.7 | 8.8 | 3.3 | 2.3 | 1.4 | 2.4 | 3.8 | 2.0 | 1.0 | 7.5 | 6.8 | 9.1 | 15.1 | 15.7 | 21.3 | 1.4 | 1.1 |
| MZUSP 51658 | 1 | 29.8 | 9.1 | 9.1 | 3.1 | 2.4 | 1.4 | 2.6 | 3.8 | 1.9 | 1.0 | 7.3 | 7.4 | 9.0 | 14.2 | 15.8 | 22.7 | 1.5 | 1.3 |
| MZUSP 51659 | 2 | 33.4 | 10.4 | 10.7 | 3.4 | 2.5 | 1.8 | 2.6 | 3.8 | 2.3 | 1.1 | 8.9 | 7.8 | 11.2 | 11.4 | 18.5 | 26.5 | 1.8 | 1.8 |
| MZUSP 31134 | 2 | 33.4 | 10.1 | 10.6 | 3.0 | 3.0 | 1.3 | 2.9 | 3.5 | 2.3 | 1.4 | 9.9 | 8.2 | 11.4 | 17.5 | 18.7 | 26.4 | 1.6 | 1.5 |
| MZUSP 126242 | 1 | 26.6 | 7.8 | 7.7 | 2.8 | 3.3 | 1.3 | 2.1 | 3.3 | 2.0 | 0.9 | 7.4 | 6.0 | 7.9 | 13.1 | 13.5 | 18.8 | 1.5 | 1.4 |
| MZUSP 126243 | 1 | 27.6 | 8.1 | 7.9 | 2.8 | 2.1 | 1.3 | 2.4 | 2.9 | 1.8 | 0.8 | 7.3 | 6.2 | 8.1 | 13.9 | 13.9 | 19.8 | 1.4 | 1.1 |
| MZUSP 126244 | 1 | 29.6 | 8.9 | 9.0 | 3.0 | 2.3 | 1.4 | 2.5 | 3.4 | 2.0 | 1.0 | 7.9 | 6.5 | 9.4 | 14.2 | 15.1 | 22.0 | 1.5 | 1.4 |
| MZUSP 126245 | 1 | 29.0 | 8.3 | 8.5 | 3.0 | 2.4 | 1.4 | 2.1 | 3.4 | 1.9 | 0.9 | 7.3 | 6.5 | 8.5 | 14.3 | 14.7 | 20.4 | 1.4 | 1.3 |
| MZUSP 126246 | 1 | 28.5 | 8.5 | 8.9 | 2.9 | 2.0 | 1.4 | 2.6 | 3.0 | 1.9 | 1.0 | 7.3 | 6.2 | 8.4 | 14.5 | 14.4 | 20.2 | 1.5 | 1.3 |
| MZUSP 126247 | 2 | 36.0 | 10.6 | 10.8 | 3.8 | 2.8 | 1.8 | 2.9 | 4.6 | 2.4 | 1.0 | 9.2 | 7.3 | 11.0 | 16.4 | 17.5 | 25.6 | 2.0 | 1.9 |
| MZUSP 121668 | 1 | 23.2 | 7.4 | 7.4 | 2.8 | 2.1 | 1.1 | 2.4 | 3.1 | 1.8 | 0.9 | 6.7 | 5.7 | 7.5 | 12.0 | 12.9 | 18.2 | 1.3 | 1.1 |
| MZUSP 121669 | 1 | 24.8 | 7.6 | 7.7 | 2.8 | 2.4 | 1.1 | 2.3 | 3.4 | 2.0 | 0.9 | 7.4 | 6.1 | 7.3 | 12.7 | 13.3 | 18.0 | 1.3 | 1.3 |
| MZUSP 121670 | 1 | 26.0 | 8.1 | 7.9 | 2.9 | 2.5 | 1.0 | 2.3 | 3.5 | 2.0 | 0.9 | 7.8 | 6.4 | 8.0 | 12.9 | 13.9 | 19.5 | 1.5 | 1.4 |
| MZUSP 121671 | 1 | 24.5 | 7.9 | 8.1 | 2.8 | 2.3 | 1.3 | 2.4 | 3.5 | 2.0 | 1.0 | 7.2 | 5.8 | 7.7 | 13.2 | 13.5 | 18.6 | 1.4 | 1.3 |
| MZUSP 117839 | 1 | 26.8 | 8.4 | 8.2 | 3.3 | 2.5 | 1.4 | 2.6 | 3.8 | 2.3 | 1.0 | 7.7 | 6.5 | 8.5 | 13.8 | 14.7 | 19.5 | 1.4 | 1.3 |
| MZUSP 118613 | 1 | 28.4 | 9.0 | 8.7 | 2.9 | 2.6 | 1.1 | 2.4 | 3.8 | 1.9 | 0.9 | 8.0 | 6.7 | 8.6 | 14.3 | 15.2 | 21.0 | 1.5 | 1.5 |
| MZUSP 118614 | 1 | 26.8 | 7.9 | 7.6 | 2.9 | 2.1 | 1.0 | 2.4 | 3.6 | 1.9 | 0.9 | 7.6 | 6.4 | 7.9 | 13.5 | 14.4 | 19.8 | 1.4 | 1.3 |
| MZUSP 118615 | 1 | 32.0 | 9.9 | 10.1 | 2.9 | 2.6 | 1.3 | 2.5 | 3.5 | 2.0 | 1.0 | 9.4 | 7.4 | 10.9 | 16.2 | 17.3 | 25.4 | 1.4 | 1.3 |
| MZUSP 118616 | 1 | 26.9 | 8.4 | 8.5 | 3.1 | 2.1 | 1.1 | 2.6 | 3.4 | 1.9 | 1.0 | 7.5 | 6.5 | 8.0 | 13.3 | 13.9 | 19.8 | 1.5 | 1.4 |
| MZUSP 118617 | 1 | 24.2 | 7.5 | 7.2 | 3.0 | 1.9 | 1.0 | 2.3 | 3.0 | 2.0 | 1.0 | 6.9 | 5.8 | 7.5 | 12.3 | 12.9 | 18.5 | 2.4 | 1.0 |
| MZUSP 118618 | 1 | 26.0 | 7.9 | 8.9 | 3.0 | 2.5 | 1.3 | 2.6 | 3.3 | 2.0 | 0.9 | 7.5 | 6.5 | 7.7 | 13.2 | 13.6 | 19.7 | 1.3 | 1.1 |
| MZUSP 118619 | 1 | 24.5 | 7.4 | 8.5 | 2.8 | 2.3 | 1.0 | 2.3 | 3.5 | 1.9 | 0.8 | 7.0 | 5.6 | 7.2 | 12.3 | 13.0 | 18.2 | 1.3 | 1.1 |
| MZUSP 118620 | 1 | 26.6 | 8.4 | 8.3 | 2.9 | 2.5 | 1.3 | 2.5 | 3.5 | 2.0 | 1.0 | 7.2 | 6.2 | 7.8 | 13.1 | 14.1 | 19.7 | 1.3 | 1.3 |
| MZUSP 118621 | 1 | 26.3 | 8.5 | 8.3 | 2.8 | 2.3 | 1.3 | 2.1 | 3.6 | 2.0 | 1.0 | 7.8 | 6.1 | 9.0 | 13.7 | 14.6 | 20.3 | 1.5 | 1.4 |
| MZUSP 118622 | 1 | 25.2 | 8.3 | 8.7 | 2.8 | 2.5 | 1.1 | 2.4 | 3.5 | 2.0 | 0.9 | 7.6 | 6.3 | 8.1 | 13.4 | 14.3 | 19.9 | 1.3 | 1.1 |
| MZUSP 118623 | 1 | 28.3 | 8.2 | 8.6 | 3.0 | 2.5 | 1.3 | 2.8 | 3.3 | 1.6 | 1.0 | 8.1 | 6.6 | 8.3 | 14.5 | 15.1 | 20.8 | 1.3 | 1.3 |
| MZUSP 118624 | 1 | 27.2 | 8.2 | 7.4 | 2.9 | 2.5 | 1.1 | 2.4 | 3.4 | 1.9 | 1.0 | 7.2 | 6.4 | 7.9 | 13.2 | 14.0 | 18.6 | 1.3 | 1.0 |
| MZUSP 118625 | 1 | 26.9 | 8.7 | 8.2 | 3.0 | 2.5 | 1.1 | 2.4 | 3.5 | 2.1 | 1.0 | 7.7 | 6.7 | 8.0 | 13.4 | 14.0 | 20.2 | 1.3 | 1.1 |
| MZUSP 118626 | 1 | 27.3 | 8.3 | 7.8 | 3.0 | 2.4 | 1.3 | 2.3 | 3.3 | 1.9 | 0.8 | 7.9 | 6.8 | 7.8 | 14.1 | 14.6 | 20.5 | 1.4 | 1.1 |
| MZUSP 118627 | 2 | 27.4 | 8.8 | 8.1 | 3.1 | 3.0 | 1.6 | 2.9 | 4.4 | 2.3 | 1.1 | 7.7 | 6.9 | 8.1 | 13.7 | 13.9 | 19.9 | 1.8 | 1.6 |
| MZUSP 118628 | 1 | 25.7 | 8.7 | 8.1 | 3.1 | 2.4 | 1.3 | 2.8 | 3.5 | 2.0 | 0.9 | 7.2 | 6.0 | 7.1 | 12.1 | 12.8 | 17.2 | 1.4 | 1.3 |
| MZUSP 118629 | 1 | 25.5 | 8.0 | 7.9 | 2.8 | 2.4 | 1.1 | 2.4 | 3.5 | 2.1 | 1.0 | 7.4 | 6.1 | 7.7 | 13.6 | 14.9 | 19.8 | 1.3 | 1.3 |
| MNRJ 51636 | 2 | 31.5 | 10.0 | 9.7 | 3.5 | 3.0 | 1.6 | 2.6 | 4.4 | 2.2 | 0.9 | 9.3 | 6.8 | 9.8 | 15.3 | 16.6 | 24.0 | 1.4 | 1.3 |
| UESC 6911 | 1 | 24.0 | 8.0 | 8.2 | 2.9 | 2.2 | 1.0 | 2.6 | 3.7 | 1.9 | 0.8 | 6.8 | 5.8 | 8.7 | 13.3 | 14.5 | 19.5 | 1.3 | 1.2 |
| UESC 6910 | 1 | 25.8 | 8.0 | 8.7 | 3.0 | 1.9 | 1.1 | 2.8 | 3.2 | 1.8 | 0.9 | 8.5 | 8.2 | 8.3 | 13.4 | 14.8 | 19.5 | 1.4 | 1.4 |
| UESC 7209 | 1 | 25.4 | 8.3 | 7.9 | 2.9 | 2.2 | 1.4 | 2.1 | 3.4 | 1.8 | 0.8 | 7.7 | 6.2 | 7.7 | 12.0 | 13.9 | 19.6 | 0.9 | 0.9 |
| UESC 7314 | 1 | 22.6 | 7.5 | 7.5 | 2.5 | 2.0 | 0.9 | 1.9 | 3.5 | 1.6 | 0.9 | 6.7 | 5.5 | 6.9 | 11.8 | 12.5 | 17.0 | 1.2 | 1.1 |
| UESC 7494 | 1 | 24.0 | 7.8 | 7.7 | 2.8 | 2.3 | 1.2 | 2.6 | 3.1 | 1.6 | 0.7 | 7.0 | 6.4 | 7.4 | 12.0 | 13.3 | 18.5 | 0.8 | 0.9 |
| UESC 7495 | 1 | 24.6 | 8.1 | 8.2 | 2.7 | 2.1 | 1.1 | 2.6 | 3.5 | 1.9 | 0.8 | 7.6 | 6.1 | 8.0 | 13.3 | 13.8 | 20.1 | 1.3 | 1.3 |
| UESC 7496 | 2 | 30.6 | 9.2 | 9.2 | 3.2 | 2.4 | 1.3 | 2.7 | 3.9 | 2.2 | 1.0 | 8.3 | 7.3 | 9.4 | 14.9 | 16.4 | 23.3 | 1.9 | 1.5 |
| MZUSP 106707 | 1 | 25.2 | 8.1 | 7.9 | 3.1 | 2.3 | 1.0 | 2.4 | 3.4 | 2.0 | 1.0 | 7.6 | 5.9 | 8.0 | 13.2 | 14.3 | 19.6 | 1.4 | 1.3 |
| MZUSP 117967 | 2 | 32.0 | 9.1 | 9.5 | 3.3 | 2.6 | 1.4 | 2.9 | 3.9 | 2.1 | 1.3 | 8.5 | 7.0 | 10.2 | 15.4 | 16.4 | 23.9 | 1.6 | 1.4 |
| MZUSP 117968 | 1 | 26.2 | 8.0 | 8.2 | 3.0 | 2.3 | 1.3 | 2.5 | 3.4 | 1.8 | 1.0 | 7.3 | 6.8 | 7.8 | 12.9 | 13.7 | 18.6 | 1.3 | 1.3 |
| MZUSP 117969 | 1 | 26.8 | 8.5 | 8.7 | 3.0 | 2.3 | 1.3 | 2.5 | 3.8 | 2.0 | 1.0 | 7.6 | 6.5 | 8.5 | 13.4 | 14.1 | 20.2 | 1.4 | 1.3 |
| MZUSP 117970 | 1 | 24.4 | 7.7 | 8.1 | 3.0 | 2.1 | 1.0 | 2.4 | 3.4 | 1.6 | 0.9 | 6.9 | 6.4 | 8.0 | 13.0 | 13.3 | 18.5 | 1.1 | 1.1 |
| MZUSP 117971 | 2 | 30.8 | 9.1 | 9.6 | 3.1 | 2.4 | 1.5 | 2.5 | 3.8 | 2.0 | 1.0 | 8.6 | 7.1 | 9.6 | 14.8 | 16.0 | 22.7 | 1.5 | 1.4 |
| MZUSP 117972 | 1 | 25.8 | 8.4 | 8.6 | 3.0 | 2.3 | 1.1 | 2.4 | 3.5 | 1.8 | 0.9 | 7.4 | 6.3 | 8.0 | 12.9 | 13.9 | 19.5 | 1.4 | 1.3 |
| MZUSP 117973 | 1 | 25.9 | 8.0 | 8.0 | 2.9 | 2.3 | 1.1 | 2.6 | 3.5 | 1.8 | 1.0 | 7.0 | 6.2 | 7.7 | 13.7 | 14.3 | 19.6 | 1.4 | 1.4 |
| MZUSP 117974 | 1 | 26.4 | 7.8 | 8.5 | 3.3 | 2.0 | 1.1 | 2.4 | 3.3 | 1.8 | 0.9 | 7.5 | 6.8 | 8.1 | 13.7 | 14.0 | 18.9 | 1.1 | 1.3 |
| MZUSP 117975 | 2 | 31.5 | 9.6 | 9.6 | 3.1 | 2.6 | 1.5 | 2.8 | 4.8 | 1.9 | 1.0 | 8.7 | 6.9 | 9.4 | 15.1 | 16.3 | 22.9 | 1.6 | 1.6 |
| MZUSP 117976 | 1 | 27.0 | 8.1 | 8.2 | 3.1 | 2.3 | 1.1 | 2.5 | 3.1 | 1.9 | 1.0 | 7.1 | 6.2 | 7.5 | 13.0 | 13.2 | 18.9 | 1.4 | 1.1 |
| MZUSP 117977 | 1 | 28.2 | 8.2 | 8.6 | 3.0 | 2.3 | 1.3 | 2.5 | 3.6 | 1.9 | 1.0 | 7.7 | 6.5 | 8.1 | 13.9 | 14.3 | 20.6 | 1.5 | 1.1 |
| MZUSP 117978 | 1 | 26.8 | 8.0 | 8.2 | 3.0 | 2.3 | 1.5 | 2.6 | 3.0 | 1.6 | 0.8 | 7.7 | 6.7 | 8.2 | 13.3 | 14.4 | 19.6 | 1.4 | 1.1 |
| MZUSP 117979 | 1 | 25.8 | 8.4 | 8.5 | 3.0 | 2.1 | 1.4 | 2.5 | 3.5 | 2.1 | 1.0 | 7.6 | 6.5 | 8.2 | 13.0 | 13.6 | 18.4 | 1.5 | 1.4 |
| MZUSP 117980 | 1 | 25.8 | 7.7 | 7.6 | 3.0 | 2.1 | 1.3 | 2.4 | 3.4 | 1.9 | 1.0 | 7.2 | 6.0 | 7.8 | 13.0 | 13.8 | 18.4 | 1.4 | 1.3 |
| MZUSP 117981 | 1 | 25.0 | 7.9 | 8.1 | 3.0 | 2.3 | 1.1 | 2.5 | 3.4 | 1.8 | 0.9 | 7.3 | 6.1 | 8.0 | 13.2 | 13.7 | 18.3 | 1.3 | 1.3 |
| MZUSP 117982 | 1 | 24.1 | 7.6 | 7.5 | 3.0 | 2.1 | 1.1 | 2.5 | 3.4 | 2.1 | 1.0 | 7.1 | 6.1 | 7.3 | 12.4 | 12.6 | 18.0 | 1.3 | 1.3 |
| MZUSP 117983 | 1 | 26.0 | 8.0 | 8.3 | 2.9 | 2.1 | 1.1 | 2.6 | 3.0 | 1.6 | 0.9 | 7.8 | 6.2 | 7.5 | 13.0 | 13.5 | 18.9 | 1.4 | 1.3 |
| MZUSP 117984 | 1 | 25.6 | 7.6 | 7.9 | 3.0 | 2.1 | 1.3 | 2.5 | 2.9 | 1.6 | 1.0 | 6.9 | 6.0 | 8.3 | 12.4 | 13.2 | 17.5 | 1.4 | 1.0 |
| MZUSP 117985 | 1 | 25.1 | 8.5 | 8.8 | 3.1 | 2.3 | 1.5 | 2.5 | 3.6 | 1.9 | 1.0 | 7.4 | 6.2 | 8.2 | 11.9 | 13.6 | 18.7 | 1.3 | 1.4 |
| MZUSP 117986 | 1 | 25.9 | 8.0 | 8.2 | 3.0 | 2.1 | 1.1 | 2.5 | 2.9 | 1.8 | 0.9 | 7.4 | 6.8 | 8.1 | 12.8 | 13.9 | 19.2 | 1.4 | 1.1 |
| MZUSP 117987 | 1 | 28.3 | 8.2 | 8.7 | 3.1 | 2.3 | 1.4 | 2.6 | 3.5 | 2.0 | 1.0 | 7.6 | 6.6 | 7.6 | 13.2 | 13.6 | 19.6 | 1.3 | 1.4 |
| MZUSP 117988 | 1 | 25.2 | 8.0 | 8.2 | 2.8 | 2.4 | 1.3 | 2.3 | 3.3 | 1.9 | 1.0 | 7.4 | 6.4 | 8.4 | 13.2 | 13.8 | 20.0 | 1.4 | 1.3 |
| MZUSP 117989 | 1 | 26.6 | 7.8 | 8.2 | 2.9 | 2.1 | 0.9 | 2.4 | 3.4 | 1.6 | 0.9 | 7.3 | 6.2 | 8.2 | 13.1 | 13.5 | 18.7 | 1.4 | 1.3 |
| MZUSP 117990 | 1 | 26.8 | 8.1 | 8.7 | 3.0 | 2.4 | 1.1 | 2.4 | 3.6 | 1.8 | 0.9 | 7.6 | 6.5 | 8.0 | 13.5 | 13.8 | 19.5 | 1.3 | 1.3 |
| MZUSP 117991 | 1 | 25.1 | 7.9 | 8.2 | 2.9 | 2.3 | 1.1 | 3.0 | 3.4 | 1.9 | 0.9 | 6.7 | 6.3 | 7.7 | 11.9 | 12.6 | 18.4 | 1.4 | 1.3 |
| MZUSP 117992 | 1 | 27.4 | 8.5 | 8.0 | 2.9 | 2.1 | 1.3 | 2.4 | 3.8 | 1.9 | 1.1 | 7.2 | 6.3 | 7.5 | 13.0 | 13.8 | 19.4 | 1.1 | 1.1 |
| MZUSP 117993 | 2 | 31.5 | 9.0 | 9.6 | 3.3 | 2.3 | 1.3 | 2.9 | 3.8 | 2.1 | 1.1 | 9.0 | 7.7 | 9.2 | 15.9 | 16.7 | 23.6 | 1.5 | 1.5 |
| MZUSP 117994 | 2 | 29.7 | 8.9 | 9.0 | 3.3 | 2.5 | 1.4 | 2.9 | 3.9 | 1.9 | 1.0 | 8.7 | 7.1 | 8.9 | 14.5 | 15.8 | 22.4 | 1.4 | 1.4 |
| MZUSP 117995 | 2 | 31.0 | 9.6 | 10.0 | 3.1 | 2.6 | 1.3 | 2.5 | 3.9 | 2.3 | 1.3 | 8.6 | 7.9 | 9.1 | 15.8 | 16.1 | 24.0 | 1.4 | 1.4 |
| MZUSP 117996 | 2 | 31.2 | 9.5 | 10.1 | 3.3 | 2.6 | 1.4 | 3.0 | 4.0 | 2.3 | 1.1 | 8.8 | 7.3 | 9.1 | 15.6 | 12.8 | 23.2 | 1.9 | 1.6 |
| MZUSP 117997 | 1 | 25.3 | 7.6 | 7.7 | 3.0 | 2.1 | 1.1 | 2.5 | 3.3 | 1.6 | 0.9 | 7.4 | 6.0 | 7.3 | 12.7 | 13.2 | 16.8 | 1.3 | 1.3 |
| MZUSP 117998 | 1 | 25.1 | 7.7 | 7.9 | 3.0 | 2.1 | 1.1 | 2.5 | 3.4 | 1.6 | 0.9 | 7.1 | 5.9 | 7.3 | 12.4 | 13.1 | 18.3 | 1.3 | 1.1 |
| MZUSP 117999 | 1 | 26.5 | 7.9 | 7.7 | 3.0 | 2.1 | 1.3 | 2.5 | 3.4 | 1.8 | 0.9 | 7.1 | 6.1 | 7.0 | 12.8 | 13.1 | 18.0 | 1.3 | 1.3 |
| MZUSP 118000 | 1 | 26.7 | 8.2 | 8.3 | 3.3 | 2.3 | 1.3 | 2.5 | 3.6 | 1.6 | 0.8 | 7.2 | 6.1 | 7.6 | 13.3 | 13.8 | 18.9 | 1.5 | 1.4 |
| MZUSP 118001 | 1 | 26.5 | 7.9 | 8.3 | 2.9 | 2.3 | 1.1 | 2.5 | 3.3 | 1.8 | 0.9 | 7.7 | 6.6 | 8.2 | 13.7 | 14.3 | 20.0 | 1.4 | 1.3 |
| MZUSP 118002 | 2 | 29.3 | 9.8 | 8.1 | 3.3 | 2.5 | 1.5 | 2.5 | 3.9 | 1.9 | 1.0 | 8.3 | 6.9 | 8.8 | 14.9 | 15.9 | 21.5 | 1.4 | 1.5 |
| MZUSP 118003 | 1 | 24.7 | 8.4 | 8.3 | 3.0 | 2.3 | 1.4 | 2.5 | 3.3 | 2.4 | 0.9 | 6.7 | 5.7 | 7.4 | 11.6 | 12.4 | 17.6 | 1.3 | 1.1 |
| MZUSP 118004 | 1 | 25.1 | 7.9 | 8.1 | 3.0 | 2.3 | 1.0 | 2.6 | 3.0 | 1.6 | 1.0 | 7.1 | 6.6 | 7.5 | 12.5 | 13.2 | 18.7 | 1.1 | 1.1 |
| MZUSP 118005 | 1 | 24.3 | 7.9 | 8.2 | 3.1 | 2.3 | 1.5 | 2.5 | 3.3 | 1.8 | 0.8 | 7.2 | 6.1 | 7.3 | 12.6 | 13.0 | 17.9 | 1.4 | 1.4 |
| MZUSP 118006 | 1 | 24.3 | 7.1 | 7.4 | 2.9 | 2.0 | 1.3 | 2.4 | 3.0 | 1.6 | 0.9 | 6.8 | 5.5 | 7.6 | 12.2 | 12.4 | 17.4 | 1.1 | 1.1 |
| MZUSP 118007 | 1 | 26.1 | 8.5 | 8.6 | 2.8 | 2.4 | 1.3 | 2.5 | 3.6 | 1.9 | 1.0 | 7.7 | 6.4 | 8.2 | 13.5 | 14.3 | 19.6 | 1.3 | 1.3 |
| MZUSP 76917 | 1 | 25.6 | 8.1 | 8.2 | 3.0 | 2.1 | 1.4 | 2.5 | 2.9 | 1.8 | 0.9 | 7.2 | 5.6 | 7.8 | 13.2 | 13.8 | 18.3 | 1.4 | 1.3 |
| MZUSP 76918 | 1 | 27.0 | 8.3 | 8.2 | 3.0 | 2.1 | 1.4 | 2.6 | 3.5 | 1.8 | 1.0 | 7.4 | 6.2 | 8.0 | 13.4 | 13.9 | 19.6 | 1.4 | 1.3 |
| MZUSP 76919 | 1 | 26.9 | 7.9 | 8.2 | 3.0 | 2.4 | 1.1 | 2.5 | 3.3 | 1.4 | 0.8 | 7.0 | 5.8 | 7.9 | 13.0 | 13.3 | 18.3 | 1.3 | 1.1 |
| MZUSP 118008 | 1 | 25.7 | 8.3 | 8.3 | 3.0 | 2.3 | 1.0 | 2.6 | 3.4 | 1.5 | 0.8 | 7.5 | 6.6 | 7.9 | 13.4 | 14.1 | 19.4 | 1.1 | 1.1 |
| MZUSP 118009 | 1 | 25.0 | 7.6 | 8.0 | 2.8 | 2.1 | 1.0 | 2.5 | 3.4 | 1.5 | 0.9 | 7.1 | 6.5 | 7.4 | 12.9 | 13.3 | 18.3 | 1.3 | 1.1 |
| MZUSP 118017 | 1 | 24.3 | 8.0 | 7.7 | 2.9 | 2.1 | 1.1 | 2.1 | 3.3 | 1.8 | 0.9 | 7.4 | 5.8 | 7.8 | 11.7 | 12.8 | 17.4 | 1.4 | 1.3 |
| MZUSP 117532 | 1 | 28.4 | 8.3 | 9.3 | 3.0 | 2.3 | 1.3 | 2.4 | 3.5 | 1.9 | 0.9 | 8.1 | 6.9 | 9.3 | 14.4 | 15.1 | 20.4 | 1.6 | 1.5 |
| MZUSP 117533 | 1 | 29.0 | 8.7 | 9.0 | 3.0 | 2.6 | 1.1 | 2.5 | 3.5 | 1.6 | 0.9 | 8.5 | 6.8 | 9.3 | 15.0 | 15.4 | 21.6 | 1.6 | 1.4 |
| MZUSP 117534 | 1 | 28.5 | 8.9 | 9.6 | 3.0 | 2.4 | 1.5 | 2.6 | 3.8 | 2.0 | 1.0 | 8.3 | 6.3 | 8.9 | 14.2 | 15.1 | 21.7 | 1.6 | 1.3 |
| MZUSP 117535 | 2 | 33.0 | 9.9 | 10.7 | 3.4 | 2.8 | 1.4 | 2.8 | 4.6 | 2.6 | 1.3 | 9.7 | 7.5 | 11.3 | 17.1 | 17.8 | 25.2 | 1.9 | 1.8 |
| MZUSP 117536 | 1 | 29.9 | 9.2 | 9.0 | 3.3 | 2.3 | 1.1 | 2.6 | 3.6 | 2.0 | 1.0 | 8.6 | 6.9 | 9.8 | 15.6 | 15.6 | 21.6 | 1.5 | 1.4 |
| MZUSP 117537 | 1 | 28.7 | 8.0 | 9.1 | 3.3 | 2.1 | 1.3 | 2.6 | 3.3 | 2.0 | 1.3 | 7.9 | 6.7 | 9.0 | 14.0 | 14.1 | 19.4 | 1.5 | 1.4 |
| MZUSP 106795 | 1 | 24.7 | 8.1 | 8.5 | 2.9 | 2.3 | 1.1 | 2.4 | 3.5 | 1.9 | 1.1 | 7.6 | 6.2 | 7.1 | 12.3 | 13.8 | 18.0 | 1.3 | 1.1 |
| MZUSP 117964 | 1 | 26.8 | 8.1 | 8.3 | 3.0 | 2.3 | 1.1 | 2.5 | 3.6 | 1.8 | 0.9 | 7.6 | 6.0 | 8.2 | 13.2 | 14.4 | 18.7 | 1.3 | 1.3 |
| MZUSP 118023 | 1 | 25.6 | 7.6 | 8.0 | 2.8 | 2.1 | 1.0 | 2.3 | 2.8 | 2.0 | 0.9 | 6.6 | 6.3 | 7.8 | 12.5 | 13.8 | 16.9 | 1.3 | 1.3 |
| MZUSP 118022 | 1 | 25.2 | 8.2 | 7.9 | 3.0 | 2.1 | 1.3 | 2.6 | 3.1 | 1.6 | 0.9 | 7.4 | 6.3 | 7.7 | 12.6 | 12.9 | 17.2 | 1.4 | 1.4 |
| MNRJ 50831 | 1 | 26.0 | 7.9 | 8.0 | 3.0 | 2.0 | 1.3 | 2.5 | 3.6 | 1.8 | 1.0 | 7.0 | 5.7 | 7.6 | 13.2 | 13.7 | 18.8 | 1.3 | 1.2 |
| MNRJ 50832 | 1 | 25.6 | 8.3 | 7.9 | 3.3 | 2.1 | 1.4 | 2.6 | 3.5 | 1.7 | 0.9 | 7.3 | 5.5 | 7.8 | 12.4 | 13.6 | 18.0 | 1.0 | 1.2 |
| MNRJ 50842 | 1 | 25.4 | 7.9 | 8.0 | 3.4 | 2.0 | 1.3 | 2.5 | 3.3 | 1.7 | 0.9 | 7.1 | 5.1 | 7.6 | 12.4 | 13.2 | 17.9 | 1.4 | 1.3 |
| MNRJ 54140 | 1 | 25.4 | 7.5 | 8.3 | 2.9 | 2.0 | 1.4 | 2.1 | 3.6 | 1.8 | 0.8 | 7.1 | 6.5 | 8.8 | 13.4 | 14.0 | 19.6 | 1.4 | 1.3 |
| MNRJ 54141 | 1 | 26.2 | 8.0 | 8.1 | 3.0 | 2.0 | 1.4 | 2.2 | 3.4 | 2.1 | 0.9 | 7.5 | 6.2 | 8.5 | 13.4 | 14.5 | 19.7 | 1.4 | 1.4 |
| MNRJ 54142 | 1 | 25.6 | 7.8 | 8.1 | 2.7 | 2.1 | 1.0 | 2.1 | 3.3 | 1.6 | 0.8 | 7.4 | 5.9 | 8.2 | 13.0 | 14.1 | 19.4 | 1.3 | 1.3 |
| MNRJ 47488 | 1 | 21.1 | 7.5 | 7.3 | 2.7 | 2.0 | 1.0 | 2.2 | 3.0 | 1.7 | 0.9 | 6.5 | 5.7 | 7.0 | 11.8 | 12.3 | 17.4 | 1.2 | 1.0 |
| UFBA 8426 | 1 | 24.2 | 7.6 | 7.6 | 2.5 | 2.2 | 1.1 | 2.2 | 3.1 | 1.5 | 0.8 | 7.1 | 5.7 | 7.8 | 11.9 | 12.9 | 17.3 | 1.2 | 1.2 |
| UFBA 8427 | 1 | 24.7 | 7.7 | 7.9 | 2.7 | 2.1 | 1.0 | 2.0 | 3.3 | 1.5 | 0.8 | 7.7 | 5.6 | 8.0 | 11.9 | 12.6 | 17.1 | 1.2 | 1.1 |
| UFBA 8428 | 1 | 24.5 | 7.4 | 7.5 | 2.7 | 2.0 | 1.1 | 1.8 | 3.5 | 1.8 | 0.6 | 6.9 | 6.2 | 7.7 | 12.5 | 13.3 | 18.1 | 1.2 | 1.1 |
| UFBA 8429 | 1 | 24.5 | 7.2 | 7.8 | 2.6 | 2.1 | 0.9 | 2.1 | 3.2 | 1.9 | 0.8 | 8.0 | 6.2 | 8.3 | 12.6 | 13.4 | 18.7 | 1.2 | 1.2 |
| UFBA 8430 | 1 | 25.4 | 7.7 | 8.4 | 2.9 | 1.9 | 1.0 | 2.6 | 3.4 | 1.8 | 0.9 | 7.1 | 6.0 | 8.1 | 12.3 | 13.0 | 17.8 | 1.2 | 1.1 |
| UFBA 8431 | 1 | 25.6 | 7.9 | 8.5 | 3.1 | 2.1 | 1.1 | 2.6 | 3.2 | 1.8 | 0.9 | 7.3 | 6.2 | 8.5 | 12.7 | 13.3 | 19.5 | 1.2 | 1.1 |
| UFBA 8432 | 1 | 24.4 | 7.4 | 8.4 | 2.7 | 1.9 | 1.1 | 1.9 | 3.1 | 1.5 | 0.7 | 6.3 | 6.0 | 8.0 | 12.4 | 13.1 | 18.2 | 1.1 | 1.1 |
| UFBA 8433 | 1 | 25.4 | 7.5 | 7.4 | 2.8 | 1.9 | 1.1 | 2.3 | 3.1 | 1.6 | 0.8 | 7.2 | 6.4 | 7.9 | 12.5 | 13.1 | 18.3 | 1.2 | 1.1 |
| UFBA 8434 | 1 | 24.5 | 7.7 | 8.1 | 2.6 | 2.1 | 1.1 | 2.1 | 3.2 | 1.3 | 0.7 | 6.8 | 5.7 | 7.8 | 12.2 | 12.9 | 17.6 | 1.1 | 1.1 |
| UFBA 8435 | 1 | 26.0 | 7.7 | 8.4 | 2.9 | 1.8 | 1.3 | 2.5 | 3.5 | 1.8 | 0.8 | 8.3 | 5.9 | 8.1 | 12.8 | 13.6 | 18.4 | 1.4 | 1.2 |
| UFBA 8436 | 1 | 25.1 | 8.0 | 8.6 | 2.8 | 2.2 | 1.1 | 2.5 | 3.5 | 2.0 | 0.9 | 7.3 | 6.3 | 8.0 | 12.3 | 13.2 | 18.2 | 1.5 | 1.3 |
| UFBA 8437 | 1 | 25.5 | 7.6 | 7.9 | 2.8 | 2.1 | 1.0 | 2.1 | 3.3 | 1.6 | 0.7 | 7.1 | 5.8 | 8.3 | 12.9 | 13.3 | 18.1 | 1.3 | 1.2 |
| UFBA 8438 | 1 | 24.2 | 7.3 | 7.7 | 2.7 | 2.1 | 1.0 | 2.0 | 3.6 | 1.6 | 0.8 | 7.3 | 5.8 | 7.7 | 13.0 | 13.5 | 18.3 | 1.1 | 1.1 |
| UFBA 8439 | 1 | 25.7 | 7.8 | 8.4 | 2.9 | 2.0 | 1.1 | 2.2 | 3.7 | 1.8 | 1.0 | 7.3 | 5.9 | 8.4 | 13.1 | 13.8 | 19.4 | 1.2 | 1.2 |
| UFBA 8440 | 1 | 26.5 | 8.2 | 8.9 | 3.0 | 2.1 | 1.3 | 2.3 | 3.6 | 1.9 | 1.0 | 7.9 | 6.3 | 8.8 | 13.7 | 14.8 | 20.4 | 1.3 | 1.2 |
| UFBA 8441 | 1 | 24.6 | 7.4 | 7.8 | 2.9 | 2.1 | 1.2 | 2.2 | 3.4 | 1.8 | 0.8 | 7.2 | 5.7 | 7.7 | 12.4 | 13.0 | 19.1 | 1.3 | 1.1 |
| UFBA 8442 | 1 | 24.2 | 7.9 | 8.2 | 2.9 | 1.8 | 1.0 | 2.3 | 3.1 | 1.6 | 0.8 | 6.8 | 5.4 | 7.5 | 11.4 | 12.8 | 17.5 | 1.2 | 1.3 |
| UFBA 8443 | 1 | 25.3 | 7.6 | 8.3 | 2.7 | 1.9 | 1.0 | 1.9 | 3.4 | 1.8 | 0.8 | 7.1 | 6.6 | 8.5 | 13.1 | 14.3 | 18.9 | 1.1 | 1.2 |
| UFBA 8444 | 1 | 25.1 | 7.5 | 8.2 | 2.8 | 2.1 | 1.1 | 2.2 | 3.4 | 1.8 | 0.9 | 7.0 | 6.0 | 8.1 | 12.6 | 13.2 | 18.6 | 1.3 | 1.2 |
| UFBA 8445 | 1 | 23.2 | 7.1 | 7.8 | 2.6 | 1.9 | 1.0 | 2.0 | 3.1 | 1.6 | 0.8 | 6.9 | 5.8 | 7.4 | 11.7 | 12.2 | 16.4 | 1.1 | 1.1 |
| MNRJ 53972 | 1 | 26.5 | 8.2 | 8.7 | 3.3 | 2.3 | 1.3 | 2.1 | 3.6 | 1.7 | 0.8 | 7.1 | 6.2 | 8.1 | 13.0 | 14.6 | 18.9 | 1.3 | 1.2 |
| MNRJ 53973 | 1 | 26.1 | 8.6 | 8.3 | 3.0 | 2.3 | 1.4 | 2.1 | 3.6 | 1.7 | 0.8 | 7.4 | 5.6 | 7.9 | 13.1 | 14.4 | 18.8 | 1.2 | 1.2 |
| MNRJ 53270 | 2 | 29.6 | 8.9 | 8.9 | 3.1 | 2.3 | 1.4 | 2.1 | 3.5 | 2.0 | 1.0 | 8.1 | 6.2 | 8.9 | 14.6 | 15.3 | 20.8 | 1.4 | 1.4 |
| MNRJ 53279 | 2 | 32.0 | 9.6 | 9.9 | 3.6 | 2.7 | 1.7 | 2.7 | 4.4 | 2.1 | 0.9 | 9.2 | 7.8 | 9.7 | 15.4 | 16.4 | 23.4 | 1.8 | 1.6 |
| MNRJ 53280 | 1 | 24.4 | 7.8 | 8.2 | 3.0 | 2.3 | 1.4 | 2.6 | 3.6 | 1.7 | 0.8 | 6.6 | 5.4 | 7.6 | 12.1 | 12.9 | 17.8 | 1.2 | 1.2 |
| MNRJ 53271 | 1 | 25.5 | 7.4 | 8.2 | 3.3 | 2.3 | 1.3 | 2.5 | 3.4 | 2.0 | 0.9 | 6.8 | 5.8 | 7.7 | 12.5 | 13.2 | 18.0 | 1.4 | 1.3 |
| MNRJ 53272 | 1 | 25.4 | 7.9 | 8.6 | 3.5 | 2.3 | 1.6 | 2.5 | 3.3 | 2.0 | 0.8 | 6.9 | 6.0 | 7.9 | 13.4 | 14.4 | 20.0 | 1.2 | 1.2 |
| MNRJ 53273 | 1 | 24.1 | 7.1 | 7.5 | 2.9 | 2.3 | 1.3 | 2.1 | 3.0 | 1.7 | 0.8 | 6.0 | 5.5 | 7.6 | 12.0 | 12.8 | 17.6 | 1.2 | 1.2 |
| MNRJ 53274 | 1 | 26.4 | 8.3 | 8.2 | 3.5 | 2.6 | 1.4 | 2.5 | 3.6 | 2.1 | 0.9 | 7.5 | 6.6 | 8.6 | 13.8 | 14.9 | 20.4 | 1.6 | 1.4 |
| MNRJ 53275 | 1 | 25.0 | 7.9 | 8.5 | 3.3 | 2.3 | 1.3 | 2.2 | 3.3 | 2.1 | 0.9 | 7.0 | 5.8 | 7.5 | 12.7 | 13.4 | 18.4 | 1.4 | 1.3 |
| MNRJ 53276 | 1 | 22.0 | 6.2 | 7.3 | 2.6 | 2.2 | 1.3 | 1.8 | 3.5 | 1.7 | 0.9 | 5.9 | 5.2 | 7.0 | 10.6 | 11.7 | 15.8 | 1.2 | 1.0 |
| MNRJ 53277 | 1 | 23.3 | 7.6 | 7.9 | 3.5 | 2.1 | 1.3 | 2.2 | 3.6 | 2.0 | 1.0 | 5.3 | 5.7 | 7.4 | 12.6 | 13.4 | 18.3 | 1.3 | 1.2 |
| MNRJ 53278 | 1 | 23.1 | 6.7 | 7.6 | 2.9 | 2.2 | 1.4 | 2.3 | 3.3 | 1.7 | 0.9 | 6.8 | 5.3 | 7.3 | 11.5 | 12.3 | 16.3 | 1.2 | 1.2 |
| MNRJ 55091 | 1 | 27.7 | 8.4 | 8.8 | 3.4 | 2.2 | 1.3 | 2.6 | 3.0 | 2.1 | 0.8 | 8.3 | 6.4 | 8.7 | 14.6 | 14.6 | 20.3 | 1.4 | 1.3 |
| MNRJ 55022 | 1 | 24.8 | 7.4 | 7.5 | 3.1 | 2.0 | 1.3 | 2.2 | 3.1 | 2.0 | 1.0 | 7.1 | 5.6 | 7.5 | 12.6 | 12.9 | 18.4 | 1.2 | 1.2 |
| MNRJ 55023 | 1 | 24.5 | 6.9 | 7.7 | 3.0 | 2.1 | 1.3 | 2.1 | 3.0 | 2.0 | 0.9 | 7.8 | 6.3 | 7.5 | 12.3 | 13.4 | 17.5 | 1.2 | 1.0 |
| MNRJ 55024 | 1 | 26.6 | 8.3 | 8.4 | 3.0 | 2.3 | 1.4 | 2.2 | 3.6 | 2.1 | 1.2 | 7.8 | 6.1 | 8.2 | 13.2 | 13.9 | 19.9 | 1.3 | 1.2 |
| MNRJ 55025 | 1 | 24.2 | 6.3 | 7.7 | 3.3 | 2.1 | 1.4 | 2.2 | 3.3 | 1.8 | 1.0 | 7.2 | 5.7 | 7.8 | 12.2 | 12.6 | 18.0 | 1.2 | 1.0 |
| MNRJ 55026 | 1 | 27.3 | 8.1 | 8.4 | 3.4 | 2.2 | 1.4 | 2.3 | 3.3 | 2.0 | 1.2 | 7.9 | 6.8 | 8.2 | 13.8 | 14.6 | 20.1 | 1.4 | 1.3 |
| MNRJ 55027 | 1 | 24.5 | 7.5 | 7.2 | 3.1 | 2.1 | 1.7 | 2.1 | 3.3 | 1.8 | 0.9 | 7.0 | 6.1 | 7.3 | 12.2 | 12.7 | 17.7 | 1.2 | 1.2 |
| MNRJ 55028 | 2 | 33.7 | 9.7 | 9.8 | 3.5 | 2.6 | 1.4 | 2.5 | 4.6 | 2.5 | 1.4 | 9.4 | 7.7 | 10.5 | 16.3 | 17.4 | 24.4 | 1.7 | 1.4 |
| MNRJ 55029 | 1 | 25.3 | 7.5 | 8.3 | 3.3 | 2.3 | 1.3 | 2.2 | 3.6 | 2.1 | 1.0 | 7.7 | 6.1 | 8.1 | 13.0 | 13.2 | 18.9 | 1.3 | 1.2 |
| MNRJ 54844 | 1 | 26.7 | 8.0 | 8.1 | 3.0 | 2.2 | 1.3 | 2.5 | 3.0 | 1.8 | 0.9 | 7.0 | 6.2 | 7.9 | 13.2 | 13.7 | 19.2 | 1.2 | 1.0 |
| MNRJ 24828 | 1 | 25.5 | 8.4 | 8.4 | 3.1 | 2.2 | 1.4 | 2.1 | 3.1 | 1.8 | 0.9 | 7.3 | 5.5 | 7.6 | 12.3 | 14.1 | 19.2 | 1.2 | 1.0 |
| MNRJ 24829 | 1 | 24.9 | 7.5 | 7.4 | 3.4 | 2.0 | 1.7 | 2.2 | 3.3 | 1.8 | 0.9 | 6.3 | 5.8 | 8.0 | 12.4 | 13.4 | 18.5 | 1.2 | 1.0 |
| MNRJ 24830 | 1 | 25.7 | 7.7 | 7.8 | 3.1 | 2.2 | 1.3 | 2.3 | 3.1 | 2.0 | 1.0 | 7.0 | 5.8 | 8.2 | 13.0 | 13.9 | 18.8 | 1.2 | 1.2 |
| MNRJ 24831 | 2 | 29.5 | 8.7 | 8.7 | 3.6 | 2.3 | 1.4 | 2.6 | 4.3 | 2.1 | 1.0 | 7.8 | 6.7 | 9.8 | 14.7 | 16.2 | 22.5 | 1.7 | 1.6 |
| MNRJ 24832 | 1 | 24.4 | 8.1 | 7.6 | 3.1 | 2.0 | 1.7 | 2.5 | 3.4 | 1.8 | 0.9 | 7.4 | 6.0 | 8.1 | 12.8 | 13.5 | 18.4 | 1.0 | 1.0 |
| MNRJ 15602 | 1 | 25.5 | 7.7 | 8.1 | 3.0 | 2.3 | 1.2 | 2.7 | 3.3 | 2.0 | 0.9 | 7.4 | 5.8 | 8.2 | 12.8 | 13.5 | 18.4 | 1.3 | 1.2 |
| MNRJ 32860 | 1 | 24.2 | 7.5 | 7.9 | 3.0 | 2.1 | 1.3 | 2.6 | 3.3 | 1.8 | 0.8 | 6.7 | 5.5 | 7.3 | 12.1 | 13.0 | 17.6 | 1.2 | 1.2 |
| MNRJ 53235 | 1 | 27.3 | 8.5 | 8.8 | 3.0 | 2.2 | 1.3 | 2.3 | 3.5 | 2.0 | 0.9 | 7.6 | 6.2 | 8.1 | 13.1 | 13.9 | 19.5 | 1.4 | 1.3 |
| MNRJ 53236 | 1 | 26.5 | 8.2 | 8.4 | 3.0 | 2.0 | 1.3 | 2.5 | 2.9 | 1.7 | 0.9 | 7.1 | 5.7 | 8.1 | 12.5 | 13.0 | 17.8 | 1.4 | 1.3 |
| MNRJ 53237 | 1 | 27.0 | 8.4 | 8.5 | 3.4 | 2.1 | 1.3 | 2.3 | 3.8 | 2.1 | 0.9 | 7.4 | 6.2 | 8.2 | 12.4 | 13.4 | 18.9 | 1.6 | 1.4 |
| MNRJ 53238 | 1 | 25.1 | 7.9 | 8.3 | 3.0 | 1.8 | 1.3 | 2.0 | 3.4 | 2.0 | 0.9 | 6.7 | 5.7 | 7.9 | 12.3 | 12.9 | 17.3 | 1.4 | 1.4 |
| MNRJ 53239 | 1 | 27.1 | 8.4 | 7.9 | 3.3 | 2.1 | 1.3 | 2.1 | 3.1 | 1.8 | 0.9 | 7.1 | 6.3 | 8.2 | 13.1 | 13.9 | 18.6 | 1.6 | 1.4 |
| MNRJ 53240 | 1 | 24.7 | 7.8 | 8.0 | 3.1 | 2.2 | 1.3 | 2.2 | 2.9 | 1.8 | 0.9 | 6.7 | 5.5 | 7.5 | 12.3 | 13.1 | 18.1 | 1.3 | 1.2 |
| MNRJ 53241 | 1 | 24.6 | 7.2 | 7.6 | 2.7 | 2.0 | 1.2 | 2.1 | 3.1 | 1.7 | 0.8 | 6.5 | 5.6 | 7.6 | 11.6 | 12.3 | 17.2 | 1.3 | 1.3 |
| MNRJ 53283 | 1 | 25.4 | 7.9 | 8.0 | 3.3 | 1.8 | 1.4 | 2.1 | 3.3 | 1.8 | 0.9 | 6.9 | 6.2 | 8.1 | 12.6 | 13.3 | 18.1 | 1.3 | 1.2 |
| MNRJ 53284 | 1 | 25.8 | 8.1 | 9.1 | 3.3 | 2.0 | 1.2 | 1.8 | 3.4 | 1.8 | 0.9 | 7.1 | 6.0 | 7.8 | 13.1 | 13.9 | 18.9 | 1.3 | 1.2 |
| MNRJ 53285 | 1 | 26.6 | 8.5 | 8.6 | 3.3 | 2.2 | 1.6 | 2.1 | 3.8 | 2.0 | 0.9 | 7.6 | 6.2 | 8.4 | 12.8 | 13.5 | 18.5 | 1.6 | 1.4 |
| MNRJ 55713 | 2 | 28.5 | 8.5 | 9.0 | 3.0 | 2.3 | 1.4 | 2.0 | 4.3 | 2.0 | 0.9 | 8.0 | 6.7 | 8.4 | 14.0 | 14.6 | 20.2 | 1.0 | 1.0 |
| MNRJ 31305 | 1 | 27.7 | 8.6 | 9.4 | 3.3 | 2.3 | 1.7 | 2.5 | 4.0 | 2.0 | 0.9 | 8.4 | 6.4 | 9.1 | 14.4 | 16.0 | 21.8 | 1.3 | 1.3 |
| MNRJ 51967 | 2 | 32.6 | 9.8 | 10.2 | 3.3 | 2.6 | 1.6 | 2.9 | 3.8 | 2.3 | 1.3 | 9.4 | 7.2 | 9.9 | 16.8 | 18.3 | 24.0 | 1.8 | 1.6 |
| MNRJ 51968 | 1 | 25.2 | 8.0 | 8.2 | 3.1 | 2.0 | 1.3 | 2.6 | 3.0 | 1.7 | 0.9 | 7.6 | 6.3 | 8.6 | 13.8 | 14.5 | 20.3 | 1.6 | 1.4 |
| MNRJ 51969 | 1 | 24.8 | 7.7 | 8.1 | 2.5 | 2.0 | 1.2 | 2.5 | 3.5 | 1.8 | 0.9 | 7.6 | 5.6 | 8.8 | 13.0 | 13.6 | 18.6 | 1.4 | 1.4 |
| MNRJ 43307 | 1 | 24.0 | 7.3 | 7.5 | 3.0 | 2.1 | 1.0 | 2.6 | 3.8 | 1.7 | 0.8 | 7.1 | 5.6 | 8.0 | 11.6 | 12.4 | 18.0 | 1.4 | 1.4 |
| MNRJ 55463 | 1 | 28.2 | 8.3 | 8.3 | 3.1 | 1.6 | 1.4 | 2.5 | 3.1 | 1.8 | 0.9 | 8.0 | 6.2 | 8.5 | 13.8 | 14.3 | 20.4 | 1.4 | 1.4 |
| MNRJ 27495 | 1 | 25.0 | 7.9 | 8.0 | 3.1 | 2.3 | 1.3 | 2.2 | 3.0 | 1.6 | 0.8 | 7.4 | 5.6 | 7.7 | 11.8 | 13.2 | 18.4 | 1.2 | 1.2 |
| MNRJ 53286 | 1 | 27.0 | 8.6 | 8.7 | 3.1 | 2.1 | 1.6 | 2.5 | 3.6 | 1.8 | 0.9 | 7.6 | 5.9 | 7.5 | 13.7 | 14.2 | 20.4 | 1.4 | 1.3 |
| MNRJ 50971 | 2 | 29.3 | 8.7 | 8.7 | 3.3 | 2.6 | 1.4 | 2.6 | 3.0 | 2.0 | 0.9 | 8.3 | 6.8 | 9.5 | 14.9 | 15.7 | 21.5 | 1.7 | 1.4 |
| MNRJ 50972 | 2 | 28.0 | 8.7 | 8.2 | 3.1 | 2.5 | 1.4 | 2.2 | 3.6 | 2.0 | 0.9 | 7.9 | 5.7 | 8.3 | 14.1 | 14.7 | 20.0 | 1.2 | 1.0 |
| MNRJ 53262 | 2 | 28.9 | 9.0 | 8.9 | 3.4 | 2.1 | 1.6 | 3.0 | 3.5 | 2.0 | 1.2 | 8.3 | 6.7 | 9.7 | 4.5 | 15.6 | 21.4 | 1.7 | 1.4 |
| MNRJ 53263 | 1 | 25.5 | 7.3 | 8.1 | 3.0 | 2.0 | 1.3 | 2.5 | 3.1 | 1.8 | 0.8 | 7.1 | 6.0 | 8.2 | 12.7 | 13.0 | 18.3 | 1.3 | 1.0 |
| MNRJ 53264 | 2 | 32.6 | 8.9 | 10.1 | 3.4 | 2.5 | 1.4 | 2.7 | 4.2 | 2.3 | 1.2 | 9.3 | 7.2 | 10.9 | 16.0 | 16.8 | 25.4 | 2.0 | 1.7 |
| MNRJ 53265 | 1 | 26.4 | 8.1 | 8.5 | 3.0 | 1.8 | 1.4 | 2.5 | 3.8 | 1.8 | 0.9 | 7.4 | 6.0 | 8.7 | 12.9 | 13.8 | 18.8 | 1.4 | 1.3 |
| MNRJ 53266 | 1 | 26.0 | 8.1 | 8.3 | 3.3 | 2.2 | 1.3 | 2.6 | 2.7 | 2.0 | 1.0 | 7.1 | 6.3 | 8.3 | 13.3 | 14.0 | 19.5 | 1.4 | 1.4 |
| MNRJ 53267 | 1 | 25.7 | 7.7 | 7.6 | 3.1 | 2.2 | 1.3 | 2.2 | 3.0 | 1.8 | 0.9 | 7.4 | 5.7 | 8.2 | 13.3 | 13.8 | 18.5 | 1.4 | 1.3 |
| MNRJ 53268 | 1 | 26.4 | 8.5 | 8.6 | 3.3 | 2.1 | 1.3 | 2.5 | 3.0 | 1.8 | 0.9 | 7.4 | 6.4 | 8.5 | 14.0 | 14.8 | 21.5 | 1.4 | 1.4 |
| MNRJ 53269 | 1 | 26.8 | 8.0 | 8.4 | 3.1 | 2.2 | 1.4 | 2.5 | 3.5 | 2.0 | 0.9 | 7.6 | 5.6 | 8.6 | 13.3 | 13.8 | 19.6 | 1.4 | 1.3 |
| MNRJ 31355 | 1 | 27.8 | 8.2 | 8.8 | 3.1 | 2.3 | 1.4 | 2.6 | 3.6 | 1.6 | 0.8 | 7.7 | 6.5 | 8.4 | 13.8 | 14.6 | 18.2 | 1.4 | 1.3 |
| MNRJ 18014 | 1 | 27.0 | 8.7 | 8.8 | 3.1 | 2.5 | 1.4 | 2.5 | 3.5 | 1.8 | 0.9 | 7.2 | 5.7 | 7.8 | 13.1 | 13.8 | 18.9 | 1.4 | 1.3 |
| MNRJ 18015 | 1 | 26.2 | 8.2 | 8.9 | 3.3 | 2.2 | 1.6 | 2.6 | 3.4 | 2.0 | 0.9 | 7.5 | 6.1 | 8.0 | 13.4 | 14.0 | 19.1 | 1.4 | 1.3 |
| MNRJ 18016 | 1 | 28.0 | 8.6 | 8.5 | 3.3 | 2.5 | 1.4 | 2.5 | 3.4 | 2.0 | 0.9 | 7.6 | 5.8 | 8.5 | 13.6 | 14.7 | 20.3 | 1.6 | 1.7 |
| MNRJ 18017 | 2 | 31.5 | 9.6 | 10.2 | 3.4 | 2.7 | 1.6 | 2.3 | 4.3 | 2.3 | 1.0 | 9.2 | 7.4 | 9.9 | 16.5 | 17.9 | 24.1 | 2.0 | 1.8 |
| MNRJ 51235 | 1 | 25.4 | 8.1 | 8.2 | 3.1 | 2.1 | 1.3 | 2.9 | 3.4 | 2.1 | 0.9 | 6.8 | 5.6 | 7.9 | 12.9 | 12.8 | 18.3 | 1.6 | 1.6 |
| MNRJ 51236 | 1 | 26.3 | 8.1 | 8.4 | 3.3 | 2.0 | 1.3 | 2.2 | 3.8 | 2.0 | 0.9 | 7.1 | 6.0 | 8.1 | 12.6 | 13.5 | 18.4 | 1.6 | 1.6 |
| MNRJ 51237 | 1 | 26.3 | 8.1 | 8.2 | 3.1 | 2.2 | 1.3 | 2.6 | 3.9 | 2.1 | 0.9 | 7.5 | 5.7 | 8.2 | 13.1 | 13.7 | 19.1 | 1.6 | 1.4 |
| MNRJ 51238 | 1 | 25.6 | 8.0 | 8.6 | 3.3 | 2.2 | 1.3 | 2.6 | 3.3 | 1.8 | 1.0 | 7.7 | 6.0 | 7.8 | 12.6 | 13.2 | 18.1 | 1.6 | 1.4 |
| MNRJ 51239 | 1 | 27.0 | 8.4 | 8.6 | 3.3 | 2.0 | 1.3 | 2.6 | 3.6 | 1.7 | 0.9 | 7.2 | 5.9 | 7.8 | 13.1 | 13.9 | 19.7 | 1.6 | 1.4 |
| MNRJ 51240 | 1 | 25.6 | 7.7 | 7.8 | 3.1 | 2.1 | 1.3 | 2.6 | 3.6 | 1.8 | 0.8 | 6.8 | 5.4 | 7.5 | 12.7 | 12.6 | 17.6 | 1.4 | 1.3 |
| MNRJ 51272 | 1 | 26.5 | 7.9 | 7.8 | 3.3 | 2.3 | 1.6 | 2.7 | 3.4 | 2.1 | 1.0 | 7.6 | 5.9 | 8.2 | 13.4 | 14.5 | 19.4 | 1.4 | 1.4 |
| MNRJ 43484 | 1 | 27.0 | 8.5 | 8.6 | 3.3 | 2.1 | 1.4 | 2.6 | 2.7 | 1.7 | 0.9 | 7.3 | 6.3 | 8.3 | 13.4 | 14.3 | 18.7 | 1.3 | 1.3 |
| MNRJ 35995 | 1 | 26.3 | 8.1 | 8.6 | 3.0 | 2.1 | 1.2 | 2.3 | 3.8 | 2.1 | 1.0 | 7.4 | 6.1 | 7.8 | 13.2 | 13.7 | 19.4 | 1.4 | 1.3 |
| MNRJ 21391 | 1 | 25.2 | 7.1 | 7.5 | 2.9 | 2.1 | 1.4 | 2.1 | 3.3 | 2.1 | 1.2 | 7.5 | 6.3 | 8.5 | 12.7 | 13.6 | 19.0 | 1.4 | 1.2 |
| MNRJ 21392 | 1 | 25.9 | 7.8 | 7.6 | 2.9 | 2.3 | 1.4 | 2.3 | 3.4 | 2.0 | 1.0 | 7.5 | 5.9 | 8.3 | 12.5 | 13.0 | 19.2 | 1.4 | 1.2 |
| MNRJ 40185 | 1 | 28.9 | 8.9 | 8.8 | 3.3 | 2.3 | 1.6 | 2.6 | 3.8 | 2.0 | 0.9 | 8.1 | 6.8 | 9.1 | 13.4 | 14.9 | 21.0 | 1.6 | 1.3 |
| MNRJ 40186 | 2 | 33.1 | 8.6 | 9.2 | 3.4 | 2.6 | 1.4 | 2.3 | 3.9 | 2.2 | 1.0 | 9.5 | 7.2 | 10.0 | 15.6 | 17.2 | 23.3 | 1.7 | 1.4 |
| MNRJ 26876 | 2 | 31.2 | 9.1 | 10.5 | 3.4 | 2.7 | 1.6 | 2.5 | 4.6 | 1.8 | 0.9 | 9.2 | 7.4 | 9.4 | 16.8 | 17.8 | 23.4 | 1.4 | 1.3 |
| MNRJ 34533 | 1 | 26.3 | 8.0 | 8.1 | 3.1 | 2.2 | 1.3 | 2.2 | 3.5 | 2.0 | 1.0 | 7.5 | 5.9 | 8.8 | 13.4 | 14.2 | 20.3 | 1.6 | 1.6 |
| MNRJ 34534 | 1 | 24.5 | 8.0 | 7.9 | 2.9 | 2.1 | 1.4 | 2.3 | 3.3 | 2.0 | 1.0 | 7.3 | 5.8 | 7.9 | 12.3 | 13.1 | 17.8 | 1.4 | 1.3 |
| MNRJ 34535 | 1 | 29.1 | 8.6 | 8.6 | 3.3 | 2.3 | 1.3 | 2.5 | 3.3 | 2.1 | 1.2 | 8.4 | 6.7 | 8.7 | 14.7 | 15.5 | 21.0 | 1.4 | 1.4 |
| MNRJ 34536 | 1 | 26.0 | 8.3 | 8.7 | 3.1 | 1.7 | 1.3 | 2.2 | 3.5 | 1.8 | 0.9 | 7.9 | 6.2 | 8.3 | 13.2 | 14.0 | 19.3 | 1.4 | 1.4 |
| MNRJ 18414 | 1 | 27.6 | 8.8 | 9.1 | 3.4 | 2.6 | 1.3 | 2.2 | 3.9 | 2.0 | 1.0 | 7.9 | 6.0 | 8.6 | 14.1 | 14.9 | 19.9 | 1.4 | 1.4 |
| MNRJ 18415 | 2 | 29.7 | 9.3 | 9.4 | 3.1 | 2.6 | 1.4 | 2.6 | 4.0 | 2.2 | 1.2 | 8.5 | 6.3 | 9.1 | 15.3 | 15.7 | 21.1 | 1.7 | 1.6 |
| MNRJ 18416 | 1 | 31.0 | 9.4 | 9.2 | 3.4 | 2.5 | 1.3 | 2.7 | 4.3 | 2.3 | 1.2 | 8.6 | 6.3 | 8.5 | 15.2 | 16.0 | 20.6 | 1.4 | 1.3 |
| MNRJ 15646 | 1 | 26.1 | 8.5 | 9.0 | 3.0 | 2.1 | 1.4 | 2.3 | 3.6 | 1.8 | 0.9 | 7.7 | 6.4 | 8.4 | 13.2 | 14.3 | 19.3 | 1.4 | 1.3 |
| MNRJ 15647 | 1 | 25.0 | 8.0 | 8.1 | 3.0 | 2.1 | 1.3 | 2.1 | 3.4 | 1.8 | 0.9 | 7.4 | 5.8 | 7.8 | 12.3 | 13.4 | 18.9 | 1.3 | 1.2 |
| MNRJ 15648 | 2 | 36.2 | 9.4 | 9.8 | 3.6 | 2.6 | 1.4 | 3.0 | 3.9 | 2.1 | 0.9 | 9.4 | 6.7 | 10.5 | 16.0 | 17.9 | 24.0 | 1.7 | 1.7 |
| MNRJ 15649 | 1 | 24.8 | 7.5 | 7.9 | 3.1 | 2.2 | 1.0 | 2.2 | 3.4 | 1.6 | 0.8 | 7.1 | 5.7 | 8.1 | 12.2 | 12.8 | 17.5 | 1.3 | 1.2 |
| MNRJ 15650 | 1 | 27.9 | 8.3 | 8.1 | 3.0 | 2.2 | 1.2 | 2.6 | 3.1 | 1.7 | 0.8 | 7.6 | 5.6 | 7.7 | 13.0 | 13.3 | 19.8 | 1.2 | 1.2 |
| MNRJ 15651 | 1 | 25.6 | 8.2 | 7.9 | 3.0 | 2.5 | 1.3 | 2.6 | 3.0 | 2.0 | 0.9 | 7.2 | 5.7 | 7.9 | 12.4 | 13.3 | 18.1 | 1.2 | 1.0 |
| MNRJ 15652 | 1 | 26.8 | 8.2 | 8.2 | 3.3 | 2.2 | 1.4 | 2.5 | 3.6 | 2.0 | 0.9 | 7.6 | 6.0 | 8.0 | 13.3 | 13.9 | 18.9 | 1.4 | 1.3 |
| MNRJ 15653 | 1 | 24.4 | 8.1 | 7.8 | 2.9 | 2.1 | 1.3 | 2.3 | 3.3 | 2.1 | 1.0 | 7.2 | 5.7 | 8.2 | 12.2 | 12.6 | 18.1 | 1.2 | 1.2 |
| MNRJ 15654 | 1 | 27.2 | 8.3 | 8.4 | 3.1 | 2.3 | 1.4 | 2.3 | 3.9 | 1.8 | 0.8 | 7.7 | 5.9 | 8.4 | 13.6 | 14.5 | 20.0 | 1.3 | 1.2 |
| MNRJ 15655 | 1 | 26.5 | 8.7 | 8.9 | 3.1 | 2.6 | 1.4 | 2.6 | 3.9 | 2.1 | 1.0 | 8.1 | 6.1 | 9.0 | 14.4 | 15.1 | 20.6 | 1.4 | 1.3 |
| MZUFV 325 | 1 | 26.2 | 8.2 | 8.0 | 2.9 | 2.0 | 1.1 | 2.3 | 3.3 | 1.8 | 0.8 | 7.4 | 6.6 | 8.0 | 12.8 | 13.6 | 19.4 | 1.0 | 1.1 |
| MZUFV 326 | 2 | 28.9 | 9.5 | 9.6 | 3.2 | 2.4 | 1.4 | 2.8 | 4.0 | 2.2 | 1.0 | 8.6 | 7.0 | 9.3 | 14.1 | 15.9 | 21.9 | 1.4 | 1.5 |
| MZUFV 327 | 1 | 28.1 | 8.0 | 8.1 | 3.1 | 2.1 | 1.3 | 2.2 | 3.3 | 1.4 | 0.7 | 7.3 | 6.7 | 7.5 | 13.0 | 13.6 | 18.8 | 1.0 | 0.9 |
| MZUFV 328 | 1 | 24.1 | 7.6 | 7.8 | 2.8 | 2.1 | 1.0 | 2.2 | 3.2 | 1.8 | 0.8 | 6.7 | 5.4 | 6.8 | 11.3 | 11.8 | 15.7 | 0.9 | 0.9 |
| MZUFV 329 | 1 | 25.8 | 8.0 | 8.0 | 3.0 | 1.9 | 1.1 | 2.4 | 3.2 | 1.8 | 0.8 | 7.4 | 6.4 | 7.6 | 12.2 | 13.4 | 18.3 | 1.2 | 0.9 |
| MZUFV 330 | 1 | 25.7 | 8.2 | 8.2 | 3.0 | 2.0 | 1.1 | 2.2 | 3.4 | 2.0 | 1.0 | 7.5 | 6.5 | 7.8 | 13.0 | 14.3 | 19.5 | 1.0 | 0.9 |
| MZUFV 331 | 1 | 25.1 | 8.0 | 7.8 | 3.1 | 2.0 | 1.1 | 2.4 | 3.3 | 1.6 | 1.0 | 7.2 | 5.9 | 7.9 | 12.3 | 12.9 | 17.7 | 1.3 | 1.1 |
| MZUFV 332 | 1 | 23.5 | 6.8 | 7.5 | 2.6 | 1.9 | 1.0 | 2.3 | 2.9 | 1.4 | 0.8 | 6.8 | 5.3 | 7.0 | 10.2 | 11.6 | 16.3 | 1.1 | 1.0 |
| MZUFV 678 | 2 | 31.7 | 9.3 | 9.6 | 3.1 | 2.4 | 1.1 | 2.7 | 3.8 | 2.2 | 1.1 | 9.2 | 7.2 | 9.8 | 15.5 | 16.2 | 23.5 | 1.5 | 1.5 |
| MZUFV 768 | 1 | 26.6 | 8.1 | 8.0 | 3.0 | 2.3 | 1.1 | 2.6 | 3.1 | 1.9 | 0.9 | 7.6 | 6.4 | 8.0 | 12.6 | 13.3 | 18.8 | 1.3 | 1.3 |
| MZUFV 769 | 1 | 25.7 | 7.9 | 7.7 | 3.0 | 2.3 | 1.3 | 2.4 | 3.1 | 2.0 | 0.8 | 7.3 | 5.7 | 7.6 | 11.5 | 13.6 | 16.8 | 1.1 | 1.2 |
| MZUFV 770 | 1 | 27.1 | 8.2 | 8.9 | 2.9 | 2.1 | 1.3 | 2.6 | 3.3 | 1.9 | 0.9 | 7.8 | 6.5 | 8.0 | 12.7 | 14.3 | 19.2 | 1.4 | 1.3 |
| MZUFV 771 | 1 | 25.4 | 7.7 | 7.9 | 3.1 | 2.1 | 1.2 | 2.0 | 3.0 | 1.5 | 0.7 | 7.3 | 5.9 | 7.4 | 12.2 | 12.5 | 18.3 | 1.0 | 1.0 |
| MZUFV 772 | 1 | 26.7 | 7.6 | 7.7 | 2.7 | 2.0 | 1.3 | 2.2 | 3.3 | 2.0 | 0.9 | 7.5 | 6.2 | 7.8 | 12.6 | 13.8 | 18.9 | 1.3 | 1.1 |
| MZUFV 773 | 2 | 31.3 | 9.9 | 9.8 | 3.2 | 2.4 | 1.4 | 2.6 | 4.3 | 2.2 | 1.1 | 9.5 | 7.8 | 10.3 | 16.1 | 17.2 | 24.3 | 1.3 | 1.5 |
| MNRJ 49307 | 2 | 22.9 | 7.6 | 7.2 | 2.7 | 2.1 | 1.3 | 2.3 | 2.9 | 1.6 | 0.8 | 6.4 | 5.2 | 7.1 | 11.2 | 12.3 | 16.9 | 1.2 | 1.0 |
| MNRJ 40445 | 1 | 27.6 | 8.2 | 8.6 | 3.1 | 2.3 | 1.4 | 2.2 | 3.6 | 1.8 | 0.9 | 8.2 | 6.3 | 8.4 | 12.5 | 14.9 | 20.5 | 1.4 | 1.3 |
| MNRJ 40446 | 2 | 33.4 | 8.5 | 9.6 | 3.3 | 2.5 | 1.4 | 2.6 | 3.5 | 2.0 | 1.2 | 9.1 | 7.3 | 9.8 | 16.3 | 17.3 | 23.6 | 1.3 | 1.2 |
| MNRJ 21677 | 1 | 26.4 | 8.5 | 8.2 | 3.1 | 2.1 | 1.3 | 2.6 | 3.4 | 1.8 | 0.9 | 7.3 | 6.3 | 8.6 | 12.9 | 13.8 | 19.3 | 1.7 | 1.4 |
| MNRJ 21678 | 1 | 26.9 | 8.4 | 8.8 | 3.4 | 2.0 | 1.6 | 2.9 | 3.9 | 2.1 | 0.9 | 6.8 | 6.5 | 8.0 | 14.5 | 15.0 | 20.0 | 1.3 | 1.2 |
| MNRJ 21679 | 1 | 24.9 | 7.9 | 8.2 | 3.0 | 2.1 | 1.3 | 2.7 | 3.6 | 1.8 | 0.9 | 7.1 | 6.2 | 7.5 | 12.7 | 12.9 | 18.9 | 1.4 | 1.3 |
| MNRJ 36053 | 1 | 28.0 | 8.3 | 8.3 | 2.6 | 2.1 | 1.3 | 2.9 | 3.0 | 2.1 | 0.9 | 7.9 | 6.9 | 8.3 | 14.1 | 15.1 | 20.7 | 1.6 | 1.4 |
| MNRJ 34139 | 1 | 27.3 | 8.3 | 8.4 | 2.7 | 2.2 | 1.3 | 2.7 | 3.1 | 2.1 | 0.9 | 7.9 | 6.2 | 8.4 | 13.0 | 13.9 | 19.2 | 1.4 | 1.3 |
| MNRJ 34140 | 1 | 27.6 | 7.9 | 8.1 | 2.6 | 2.2 | 1.3 | 2.6 | 3.4 | 1.8 | 0.9 | 7.6 | 6.3 | 8.7 | 13.6 | 13.8 | 18.8 | 1.6 | 1.3 |
| MNRJ 36461 | 1 | 23.4 | 7.3 | 7.9 | 2.9 | 2.0 | 1.3 | 2.1 | 3.3 | 1.4 | 0.8 | 7.1 | 5.7 | 7.4 | 11.5 | 12.2 | 16.6 | 1.3 | 1.0 |
| MNRJ 36351 | 1 | 26.6 | 8.0 | 7.9 | 2.9 | 2.1 | 1.6 | 2.5 | 3.4 | 1.7 | 0.9 | 8.1 | 6.5 | 8.0 | 13.3 | 14.0 | 19.6 | 1.3 | 1.2 |
| MNRJ 36352 | 1 | 26.5 | 7.9 | 7.9 | 3.0 | 2.2 | 1.2 | 2.2 | 3.5 | 1.6 | 0.8 | 8.0 | 6.4 | 8.6 | 13.2 | 14.1 | 19.9 | 1.3 | 1.3 |
| MNRJ 21426 | 1 | 25.3 | 8.1 | 8.3 | 3.0 | 2.3 | 1.2 | 2.5 | 3.0 | 2.0 | 0.9 | 7.6 | 6.2 | 8.4 | 13.3 | 14.1 | 18.8 | 1.3 | 1.4 |
| MNRJ 21427 | 1 | 25.1 | 7.3 | 7.5 | 3.1 | 2.1 | 1.4 | 2.7 | 3.1 | 1.6 | 0.8 | 7.4 | 6.0 | 8.0 | 12.4 | 12.6 | 17.6 | 1.3 | 1.3 |
| MNRJ 21428 | 1 | 27.6 | 8.2 | 8.3 | 3.1 | 2.2 | 1.4 | 2.3 | 3.3 | 2.0 | 1.0 | 7.6 | 6.2 | 7.7 | 13.1 | 13.5 | 18.3 | 1.4 | 1.3 |
| MNRJ 21429 | 1 | 27.0 | 7.8 | 8.3 | 2.9 | 2.2 | 1.7 | 2.7 | 3.3 | 2.1 | 1.0 | 7.9 | 6.1 | 8.1 | 13.1 | 13.2 | 17.9 | 1.4 | 1.4 |
| MNRJ 31437 | 1 | 25.4 | 7.9 | 8.5 | 3.1 | 2.1 | 1.2 | 2.3 | 3.1 | 1.8 | 0.9 | 7.5 | 6.0 | 8.2 | 12.6 | 13.2 | 18.4 | 1.3 | 1.2 |
| MNRJ 31438 | 1 | 26.6 | 8.1 | 8.8 | 2.9 | 2.2 | 1.2 | 2.6 | 3.3 | 1.8 | 1.0 | 7.7 | 6.7 | 8.6 | 13.3 | 13.8 | 18.8 | 1.4 | 1.4 |
| MNRJ 31439 | 1 | 27.0 | 7.9 | 8.5 | 3.0 | 2.2 | 1.4 | 2.6 | 3.4 | 1.8 | 1.0 | 8.0 | 6.5 | 8.2 | 13.3 | 13.9 | 19.4 | 1.7 | 1.4 |
| MNRJ 31440 | 1 | 25.7 | 7.8 | 8.2 | 3.0 | 2.2 | 1.3 | 2.7 | 3.0 | 1.8 | 0.8 | 7.6 | 6.3 | 8.3 | 13.4 | 13.7 | 18.9 | 1.4 | 1.2 |
| MNRJ 31441 | 1 | 29.3 | 9.1 | 9.2 | 3.3 | 2.2 | 1.6 | 3.0 | 3.5 | 2.1 | 0.9 | 8.3 | 6.3 | 9.1 | 14.2 | 14.2 | 19.9 | 1.6 | 1.6 |
| MNRJ 31442 | 1 | 26.9 | 8.1 | 8.5 | 3.1 | 2.3 | 1.3 | 2.6 | 3.3 | 1.8 | 0.9 | 7.7 | 6.5 | 9.2 | 13.4 | 13.8 | 19.6 | 1.7 | 1.4 |
| MNRJ 31443 | 1 | 26.9 | 7.4 | 8.3 | 3.0 | 2.1 | 1.4 | 2.5 | 3.3 | 1.7 | 0.8 | 8.1 | 6.5 | 9.0 | 14.0 | 14.7 | 20.6 | 1.4 | 1.3 |
| MNRJ 31444 | 1 | 26.9 | 7.9 | 8.4 | 2.9 | 2.3 | 1.4 | 2.3 | 3.4 | 1.8 | 0.9 | 8.0 | 6.2 | 8.8 | 13.5 | 13.8 | 19.4 | 1.4 | 1.3 |
| MNRJ 31445 | 1 | 25.9 | 8.1 | 8.8 | 3.0 | 2.1 | 1.3 | 2.6 | 3.4 | 1.8 | 1.0 | 7.9 | 6.2 | 8.6 | 13.2 | 14.2 | 19.7 | 1.4 | 1.3 |
| MNRJ 43428 | 1 | 26.1 | 8.3 | 8.5 | 3.1 | 2.0 | 1.3 | 2.6 | 3.5 | 1.8 | 0.9 | 7.4 | 5.4 | 7.5 | 13.2 | 13.9 | 19.5 | 1.3 | 1.2 |
| MNRJ 31637 | 1 | 27.4 | 8.5 | 8.4 | 3.3 | 2.2 | 1.2 | 2.7 | 3.3 | 2.0 | 0.9 | 7.7 | 5.5 | 8.6 | 13.2 | 13.9 | 19.8 | 1.4 | 1.4 |
| MNRJ 31638 | 1 | 27.2 | 8.2 | 8.3 | 3.3 | 2.0 | 1.3 | 2.7 | 3.6 | 1.8 | 0.9 | 7.5 | 5.8 | 8.5 | 12.5 | 13.7 | 19.4 | 1.6 | 1.4 |
| MNRJ 41737 | 1 | 26.9 | 7.8 | 7.1 | 3.0 | 2.1 | 1.3 | 2.3 | 3.5 | 1.7 | 0.9 | 7.6 | 6.3 | 8.2 | 12.3 | 13.4 | 18.4 | 1.4 | 1.3 |
| MNRJ 32193 | 1 | 25.4 | 7.8 | 8.0 | 3.1 | 2.3 | 1.0 | 2.9 | 3.5 | 2.0 | 0.9 | 7.7 | 5.9 | 8.4 | 13.1 | 14.3 | 19.6 | 1.4 | 1.4 |
| MNRJ 32194 | 1 | 25.6 | 7.8 | 8.3 | 3.0 | 2.2 | 1.4 | 2.6 | 3.4 | 1.8 | 0.8 | 7.5 | 5.8 | 8.3 | 12.7 | 13.3 | 19.4 | 1.4 | 1.3 |
| MNRJ 30688 | 1 | 25.7 | 7.8 | 8.1 | 2.9 | 2.0 | 1.3 | 2.5 | 3.3 | 1.6 | 0.9 | 7.4 | 5.7 | 8.5 | 12.7 | 13.4 | 19.7 | 1.3 | 1.2 |
| MNRJ 30689 | 1 | 25.1 | 7.6 | 7.7 | 2.9 | 2.1 | 1.3 | 2.5 | 3.1 | 1.8 | 0.9 | 6.7 | 5.5 | 6.9 | 12.1 | 12.8 | 17.3 | 1.3 | 1.2 |
| MNRJ 30690 | 1 | 25.2 | 7.7 | 7.9 | 2.9 | 2.1 | 1.3 | 2.3 | 3.0 | 1.7 | 0.9 | 6.8 | 5.2 | 7.5 | 12.1 | 12.6 | 17.3 | 1.3 | 1.3 |
| MNRJ 28926 | 2 | 24.3 | 7.5 | 7.3 | 2.5 | 2.3 | 0.9 | 2.2 | 3.1 | 1.7 | 0.9 | 6.8 | 5.5 | 7.1 | 11.8 | 12.7 | 17.0 | 1.2 | 1.0 |
| MNRJ 54619 | 1 | 23.9 | 8.0 | 8.1 | 2.9 | 2.0 | 1.3 | 2.5 | 3.8 | 2.0 | 0.9 | 6.9 | 5.9 | 8.4 | 12.2 | 12.7 | 18.3 | 1.4 | 1.3 |
| MNRJ 54620 | 1 | 27.8 | 9.0 | 8.4 | 3.1 | 2.5 | 1.4 | 2.7 | 4.3 | 1.8 | 0.9 | 7.8 | 6.5 | 9.3 | 13.6 | 14.6 | 20.4 | 1.7 | 1.4 |
| MNRJ 54621 | 1 | 25.5 | 8.5 | 8.3 | 2.6 | 2.2 | 1.3 | 2.6 | 3.5 | 1.8 | 1.0 | 7.2 | 6.0 | 8.4 | 12.4 | 13.4 | 18.7 | 1.4 | 1.3 |
| MNRJ 54622 | 1 | 25.7 | 8.7 | 8.6 | 3.0 | 2.2 | 1.3 | 2.6 | 3.1 | 1.8 | 1.0 | 7.6 | 6.6 | 8.4 | 13.5 | 14.0 | 19.9 | 1.6 | 1.6 |
| MNRJ 50241 | 1 | 25.4 | 7.8 | 7.5 | 3.1 | 2.1 | 1.2 | 2.1 | 3.3 | 1.7 | 0.9 | 6.8 | 5.8 | 7.5 | 13.0 | 13.7 | 18.2 | 1.3 | 1.2 |
| MNRJ 30317 | 2 | 29.1 | 9.4 | 9.2 | 3.3 | 2.9 | 1.4 | 2.6 | 4.0 | 2.2 | 1.2 | 8.8 | 7.3 | 9.8 | 16.3 | 16.7 | 23.1 | 1.6 | 1.4 |
| MNRJ 30318 | 2 | 31.1 | 10.1 | 10.1 | 3.3 | 2.9 | 1.7 | 2.5 | 3.9 | 2.1 | 1.0 | 8.9 | 7.3 | 10.4 | 16.4 | 17.0 | 24.5 | 1.4 | 1.3 |
| MNRJ 30319 | 1 | 25.4 | 8.1 | 7.8 | 3.0 | 2.2 | 1.0 | 2.5 | 3.4 | 1.8 | 0.9 | 7.0 | 6.0 | 7.6 | 13.1 | 14.1 | 17.7 | 1.0 | 1.0 |
| MNRJ 37203 | 1 | 27.0 | 8.6 | 8.8 | 3.3 | 2.3 | 1.3 | 2.5 | 3.5 | 2.0 | 0.9 | 7.8 | 6.9 | 8.7 | 14.3 | 15.3 | 20.1 | 1.4 | 1.3 |
| MNRJ 37204 | 1 | 33.1 | 10.3 | 10.6 | 3.1 | 2.6 | 1.6 | 3.0 | 4.2 | 2.0 | 0.9 | 8.9 | 7.8 | 10.4 | 16.0 | 16.8 | 24.4 | 1.4 | 1.6 |
| MNRJ 37205 | 1 | 24.6 | 7.8 | 7.9 | 3.0 | 2.0 | 1.3 | 2.1 | 3.3 | 1.8 | 0.9 | 6.7 | 5.6 | 7.7 | 12.1 | 12.9 | 17.6 | 1.3 | 1.2 |
| MZUFV 379 | 1 | 28.5 | 8.8 | 7.9 | 2.9 | 2.4 | 1.1 | 2.7 | 3.6 | 1.9 | 0.9 | 7.6 | 6.5 | 8.5 | 12.6 | 14.5 | 20.4 | 1.5 | 1.3 |
| MZUFV 381 | 1 | 24.8 | 7.5 | 7.8 | 2.5 | 2.0 | 1.1 | 2.3 | 3.1 | 1.6 | 0.8 | 8.0 | 6.5 | 8.1 | 13.1 | 13.8 | 18.3 | 1.5 | 1.3 |
| MZUFV 562 | 1 | 25.6 | 7.3 | 7.7 | 2.8 | 2.0 | 1.1 | 2.6 | 3.2 | 1.9 | 0.8 | 7.4 | 6.4 | 8.1 | 12.7 | 13.2 | 19.3 | 1.4 | 1.3 |
| MZUFV 563 | 1 | 26.4 | 8.0 | 7.5 | 2.9 | 2.2 | 1.1 | 2.6 | 3.3 | 1.8 | 0.8 | 7.6 | 6.2 | 8.4 | 12.5 | 13.4 | 18.6 | 1.4 | 1.3 |
| MZUFV 564 | 1 | 26.4 | 8.1 | 7.8 | 2.9 | 2.1 | 1.1 | 2.5 | 3.4 | 1.9 | 0.9 | 7.9 | 6.1 | 8.4 | 13.2 | 14.3 | 19.4 | 1.4 | 1.2 |
| MZUFV 566 | 1 | 25.3 | 7.9 | 8.0 | 2.9 | 2.1 | 1.2 | 2.5 | 3.0 | 1.8 | 0.9 | 7.7 | 6.6 | 8.4 | 13.1 | 13.7 | 19.5 | 1.5 | 1.4 |
| MZUFV 567 | 1 | 25.5 | 7.6 | 7.8 | 2.7 | 2.2 | 1.0 | 2.5 | 3.2 | 1.6 | 0.8 | 7.6 | 5.8 | 8.4 | 11.9 | 13.0 | 18.5 | 1.3 | 1.2 |
| MZUFV 584 | 2 | 34.1 | 9.7 | 9.7 | 3.3 | 2.6 | 1.3 | 3.1 | 4.2 | 2.4 | 1.3 | 9.6 | 8.1 | 10.9 | 16.7 | 17.3 | 54.5 | 2.0 | 1.9 |
| MZUFV 863 | 1 | 25.6 | 7.9 | 8.2 | 2.8 | 2.3 | 1.3 | 2.6 | 3.5 | 2.1 | 1.0 | 7.7 | 6.2 | 8.1 | 12.7 | 13.5 | 19.0 | 1.3 | 1.3 |
| MZUFV 864 | 1 | 25.1 | 7.8 | 8.0 | 2.7 | 2.0 | 0.9 | 2.3 | 3.2 | 1.9 | 0.9 | 7.3 | 5.7 | 8.2 | 11.7 | 12.9 | 18.0 | 1.4 | 1.2 |
| MZUFV 865 | 1 | 25.6 | 7.7 | 7.2 | 2.8 | 2.1 | 1.1 | 2.4 | 3.2 | 1.9 | 0.9 | 7.3 | 6.1 | 7.6 | 12.5 | 12.6 | 17.8 | 1.2 | 1.1 |
| MZUFV 866 | 1 | 25.4 | 8.1 | 8.0 | 2.9 | 1.9 | 1.1 | 2.4 | 3.2 | 2.0 | 0.9 | 7.7 | 6.5 | 8.3 | 12.6 | 13.7 | 19.1 | 1.2 | 1.1 |
| MZUFV 913 | 1 | 25.6 | 8.0 | 8.0 | 2.9 | 2.1 | 1.0 | 2.5 | 3.4 | 2.0 | 0.9 | 7.2 | 5.9 | 8.3 | 12.3 | 13.1 | 19.2 | 1.2 | 1.3 |
| MZUFV 914 | 1 | 25.3 | 8.3 | 8.3 | 2.9 | 1.8 | 1.1 | 2.3 | 3.2 | 1.9 | 0.8 | 7.8 | 5.9 | 8.1 | 12.4 | 13.6 | 19.1 | 1.3 | 1.1 |
| MZUFV 915 | 1 | 25.0 | 7.7 | 7.3 | 3.0 | 1.6 | 1.0 | 2.4 | 3.1 | 1.9 | 0.9 | 7.5 | 5.8 | 8.4 | 12.2 | 12.8 | 18.0 | 1.1 | 1.0 |
| MZUFV 916 | 1 | 26.6 | 8.1 | 7.5 | 3.1 | 2.1 | 1.2 | 2.7 | 3.1 | 2.0 | 0.9 | 7.6 | 6.4 | 8.3 | 12.4 | 13.4 | 18.3 | 1.3 | 1.3 |
| MZUFV 917 | 1 | 24.5 | 7.7 | 8.8 | 3.0 | 2.0 | 1.1 | 2.3 | 3.1 | 1.8 | 0.8 | 7.5 | 6.4 | 8.0 | 12.6 | 13.4 | 18.2 | 1.3 | 1.2 |
| MZUFV 1499 | 1 | 24.4 | 7.1 | 7.6 | 2.9 | 2.1 | 1.1 | 2.6 | 3.3 | 1.9 | 0.9 | 7.8 | 5.5 | 7.9 | 11.7 | 12.7 | 18.2 | 1.3 | 1.2 |
| MZUFV 1500 | 1 | 24.5 | 8.0 | 8.0 | 3.2 | 2.0 | 1.1 | 2.5 | 3.2 | 1.6 | 0.8 | 7.4 | 6.5 | 7.8 | 12.4 | 13.2 | 18.2 | 1.3 | 1.2 |
| MZUFV 1501 | 1 | 24.7 | 6.9 | 7.6 | 2.8 | 1.9 | 1.1 | 2.3 | 2.9 | 1.6 | 0.8 | 7.1 | 5.8 | 7.2 | 12.4 | 13.0 | 17.8 | 1.0 | 1.0 |
| MZUFV 1502 | 1 | 24.6 | 7.9 | 7.8 | 2.9 | 2.1 | 1.3 | 2.4 | 2.9 | 1.6 | 0.8 | 7.4 | 5.9 | 7.8 | 11.8 | 12.4 | 16.9 | 1.4 | 1.2 |
| MZUFV 1503 | 1 | 24.8 | 7.5 | 7.4 | 3.0 | 2.1 | 1.2 | 2.2 | 3.2 | 2.0 | 0.9 | 6.9 | 6.0 | 7.6 | 12.0 | 12.9 | 18.9 | 1.3 | 1.2 |
| MZUFV 1511 | 2 | 28.8 | 8.9 | 8.7 | 3.3 | 2.2 | 1.3 | 2.6 | 3.5 | 2.4 | 1.1 | 8.4 | 7.4 | 8.8 | 14.2 | 15.6 | 20.3 | 1.3 | 1.3 |
| MZUFV 1572 | 2 | 31.6 | 9.6 | 9.3 | 3.5 | 2.4 | 1.3 | 3.1 | 4.2 | 2.3 | 1.1 | 8.9 | 7.7 | 10.4 | 15.9 | 16.7 | 24.9 | 1.9 | 1.8 |
| MZUFV 1574 | 1 | 24.9 | 8.4 | 8.2 | 3.1 | 1.9 | 1.0 | 2.5 | 3.1 | 1.6 | 0.7 | 7.3 | 6.4 | 7.9 | 12.4 | 13.1 | 19.1 | 1.2 | 1.2 |
| MZUFV 1575 | 1 | 25.0 | 7.8 | 7.9 | 3.0 | 2.0 | 1.2 | 2.7 | 3.1 | 1.9 | 0.8 | 7.9 | 6.1 | 8.1 | 13.3 | 14.0 | 19.4 | 1.3 | 1.2 |
| MZUFV 2103 | 1 | 25.4 | 7.6 | 7.8 | 2.7 | 2.0 | 1.0 | 2.5 | 3.1 | 1.6 | 0.8 | 7.5 | 6.1 | 8.1 | 12.3 | 12.7 | 18.4 | 1.4 | 1.2 |
| MZUFV 2104 | 1 | 25.6 | 7.9 | 8.0 | 2.6 | 2.1 | 1.3 | 2.3 | 3.2 | 1.8 | 0.8 | 7.6 | 6.4 | 8.0 | 12.0 | 13.2 | 18.8 | 1.3 | 1.3 |
| MZUFV 2264 | 1 | 25.4 | 7.7 | 8.2 | 3.1 | 1.9 | 1.1 | 2.4 | 3.2 | 1.6 | 0.8 | 8.0 | 6.2 | 8.2 | 13.3 | 14.3 | 19.5 | 1.5 | 1.3 |
| MZUFV 2265 | 1 | 25.8 | 8.4 | 8.5 | 3.1 | 2.0 | 1.1 | 2.4 | 3.2 | 2.1 | 1.0 | 7.5 | 6.2 | 8.4 | 12.6 | 13.8 | 19.8 | 1.3 | 1.1 |
| MZUFV 2266 | 1 | 25.8 | 8.0 | 8.2 | 2.9 | 1.9 | 1.1 | 2.5 | 3.3 | 1.9 | 0.8 | 7.4 | 6.1 | 7.9 | 12.6 | 13.4 | 18.6 | 1.0 | 1.0 |
| MZUFV 2393 | 1 | 23.2 | 7.8 | 7.9 | 3.0 | 1.9 | 1.1 | 3.2 | 3.1 | 1.8 | 0.9 | 7.0 | 5.8 | 7.2 | 12.1 | 12.8 | 17.1 | 1.1 | 1.1 |
| MZUFV 2425 | 1 | 26.2 | 8.2 | 8.3 | 3.2 | 2.0 | 1.1 | 2.4 | 3.3 | 1.8 | 0.8 | 8.0 | 6.3 | 8.4 | 13.7 | 14.3 | 19.6 | 1.1 | 1.0 |
| MZUFV 2426 | 1 | 25.3 | 7.6 | 7.9 | 2.9 | 2.1 | 1.2 | 2.3 | 3.1 | 1.8 | 0.8 | 6.9 | 5.7 | 7.9 | 12.5 | 13.4 | 19.3 | 1.1 | 1.0 |
| MZUFV 2640 | 1 | 28.0 | 8.7 | 8.7 | 3.3 | 2.0 | 1.1 | 2.6 | 3.3 | 1.9 | 0.9 | 7.9 | 6.7 | 8.8 | 13.8 | 14.7 | 20.7 | 1.3 | 1.2 |
| MZUFV 3337 | 1 | 25.6 | 8.4 | 8.4 | 3.0 | 2.1 | 1.2 | 2.3 | 3.3 | 1.6 | 0.8 | 7.7 | 6.0 | 8.3 | 13.9 | 14.5 | 20.4 | 1.5 | 1.3 |
| MZUFV 3338 | 1 | 26.1 | 8.7 | 9.3 | 2.9 | 2.2 | 1.2 | 2.3 | 3.7 | 1.6 | 0.7 | 7.5 | 5.8 | 8.1 | 13.3 | 13.7 | 19.0 | 1.3 | 1.2 |
| MZUFV 3412 | 1 | 24.9 | 7.6 | 7.6 | 3.0 | 2.0 | 1.2 | 2.5 | 3.4 | 2.0 | 0.8 | 7.1 | 6.1 | 7.7 | 12.6 | 13.3 | 18.1 | 1.2 | 1.2 |
| MZUFV 3413 | 1 | 24.4 | 7.7 | 8.2 | 3.2 | 1.9 | 0.9 | 2.7 | 2.9 | 1.5 | 0.7 | 7.2 | 6.3 | 7.4 | 12.4 | 12.6 | 18.1 | 1.4 | 1.3 |
| MZUFV 3414 | 1 | 24.6 | 7.5 | 7.9 | 3.1 | 2.1 | 1.2 | 2.7 | 3.6 | 1.8 | 1.0 | 7.1 | 6.2 | 7.8 | 12.3 | 13.1 | 18.5 | 1.3 | 1.2 |
| MZUFV 3415 | 1 | 25.3 | 8.2 | 9.0 | 3.2 | 2.1 | 0.8 | 2.6 | 6.2 | 2.0 | 1.0 | 7.5 | 6.6 | 7.9 | 13.0 | 13.4 | 18.4 | 1.4 | 1.3 |
| MZUFV 3416 | 1 | 25.2 | 7.9 | 8.0 | 2.9 | 2.0 | 1.2 | 2.6 | 3.5 | 2.0 | 1.0 | 7.2 | 5.9 | 7.7 | 12.1 | 12.4 | 18.2 | 1.4 | 1.3 |
| MZUFV 3417 | 1 | 25.0 | 8.2 | 8.6 | 3.0 | 2.1 | 1.1 | 2.9 | 3.2 | 1.8 | 0.9 | 7.7 | 6.1 | 7.9 | 13.5 | 14.0 | 20.0 | 1.5 | 1.4 |
| MZUFV 3790 | 1 | 33.7 | 9.8 | 10.4 | 3.4 | 2.5 | 1.9 | 3.1 | 4.2 | 2.1 | 1.0 | 9.3 | 7.0 | 10.8 | 15.3 | 16.2 | 24.8 | 2.0 | 1.9 |
| MZUFV 3791 | 1 | 24.4 | 7.7 | 8.2 | 3.0 | 1.9 | 1.2 | 2.5 | 3.1 | 1.9 | 0.9 | 7.4 | 6.4 | 8.1 | 12.6 | 13.1 | 18.8 | 1.3 | 1.0 |
| MZUFV 3792 | 1 | 26.0 | 8.3 | 7.8 | 2.9 | 2.1 | 1.1 | 2.5 | 3.6 | 1.9 | 0.8 | 7.2 | 5.9 | 8.1 | 12.5 | 13.5 | 19.5 | 1.2 | 1.1 |
| MZUFV 2508 | 2 | 30.2 | 9.6 | 10.2 | 3.3 | 2.3 | 1.3 | 2.4 | 4.4 | 2.2 | 1.1 | 9.8 | 7.6 | 10.6 | 16.4 | 16.7 | 24.7 | 1.9 | 1.6 |
| MZUFV 4039 | 1 | 25.1 | 8.0 | 8.1 | 2.7 | 2.2 | 1.0 | 2.4 | 3.6 | 1.9 | 0.9 | 7.4 | 5.8 | 8.3 | 12.3 | 12.5 | 18.2 | 1.8 | 1.5 |
| MZUFV 5235 | 1 | 25.9 | 8.3 | 8.8 | 2.7 | 2.4 | 1.1 | 2.3 | 3.6 | 1.9 | 0.9 | 7.3 | 6.4 | 8.5 | 12.8 | 13.7 | 19.0 | 1.3 | 1.3 |
| MZUFV 5236 | 1 | 27.3 | 8.8 | 9.0 | 3.2 | 2.2 | 1.2 | 2.7 | 3.1 | 2.1 | 0.9 | 7.8 | 6.3 | 8.6 | 13.5 | 14.2 | 20.9 | 1.5 | 1.5 |
| MZUFV 5237 | 1 | 25.6 | 8.4 | 8.1 | 2.6 | 2.2 | 1.2 | 2.3 | 3.6 | 1.9 | 0.8 | 7.9 | 6.0 | 8.3 | 14.0 | 14.3 | 20.1 | 1.5 | 1.3 |
| MZUFV 5238 | 1 | 26.1 | 8.6 | 8.9 | 2.8 | 2.3 | 1.2 | 2.7 | 3.2 | 1.9 | 1.0 | 7.8 | 6.3 | 8.7 | 13.5 | 14.3 | 20.3 | 1.3 | 1.4 |
| MZUFV 5239 | 1 | 25.8 | 8.4 | 8.2 | 3.0 | 2.1 | 1.1 | 2.6 | 3.3 | 1.9 | 0.9 | 7.8 | 6.1 | 8.2 | 13.5 | 14.2 | 19.7 | 1.5 | 1.4 |
| MZUFV 5240 | 1 | 37.4 | 8.1 | 8.2 | 2.9 | 2.5 | 1.1 | 2.6 | 3.8 | 1.9 | 0.9 | 7.6 | 6.5 | 8.2 | 13.3 | 14.2 | 19.9 | 1.3 | 1.3 |
| MZUFV 5266 | 1 | 25.8 | 8.2 | 8.2 | 2.8 | 2.4 | 1.1 | 2.5 | 3.6 | 1.8 | 0.9 | 7.4 | 5.9 | 8.4 | 13.3 | 14.0 | 19.5 | 1.6 | 1.5 |
| MZUFV 5267 | 1 | 26.6 | 8.7 | 8.1 | 2.9 | 2.4 | 1.2 | 2.7 | 3.4 | 1.8 | 0.9 | 7.8 | 6.1 | 8,,76 | 13.5 | 13.6 | 20.4 | 1.5 | 1.5 |
| MZUFV 5623 | 1 | 25.3 | 7.9 | 8.1 | 2.6 | 2.2 | 1.0 | 2.2 | 3.4 | 1.8 | 0.9 | 7.7 | 5.8 | 8.5 | 12.3 | 13.3 | 18.4 | 1.4 | 1.3 |
| MZUFV 5630 | 1 | 25.2 | 8.2 | 8.4 | 2.6 | 2.2 | 1.0 | 2.1 | 4.2 | 1.9 | 0.9 | 7.8 | 6.2 | 8.3 | 13.6 | 14.7 | 20.3 | 1.6 | 1.4 |
| CFBH 16338 | 1 | 26.1 | 7.7 | 8.8 | 3.5 | 2.5 | 1.2 | 3.0 | 3.5 | 1.8 | 1.1 | 7.9 | 6.8 | 8.4 | 13.8 | 15.0 | 20.4 | 1.5 | 1.4 |
| CFBH 16339 | 1 | 26.2 | 7.9 | 8.4 | 3.3 | 2.4 | 1.3 | 2.5 | 3.6 | 2.0 | 1.0 | 7.1 | 6.1 | 8.1 | 13.4 | 13.9 | 19.3 | 1.6 | 1.5 |
| CFBH 18605 | 1 | 26.5 | 8.0 | 8.4 | 3.1 | 2.4 | 1.3 | 2.9 | 3.6 | 2.0 | 1.0 | 7.6 | 6.5 | 8.4 | 13.1 | 14.2 | 20.2 | 1.4 | 1.3 |
| CFBH 11065 | 1 | 27.5 | 7.7 | 8.5 | 3.3 | 2.4 | 1.3 | 2.7 | 3.7 | 1.9 | 1.0 | 7.3 | 6.6 | 8.7 | 13.6 | 14.3 | 20.6 | 1.5 | 1.4 |
| MHNCI 1416 | 1 | 27.0 | 8.2 | 8.1 | 2.9 | 2.3 | 1.2 | 2.5 | 3.4 | 1.9 | 0.9 | 7.5 | 6.4 | 8.4 | 13.7 | 14.9 | 21.5 | 1.4 | 1.3 |
| MHNCI 1417 | 1 | 27.9 | 8.5 | 8.3 | 3.0 | 2.2 | 1.3 | 2.7 | 3.5 | 2.1 | 0.9 | 7.5 | 6.4 | 9.0 | 13.2 | 14.3 | 20.5 | 1.5 | 1.4 |
| MHNCI 1418 | 1 | 27.6 | 8.7 | 8.4 | 3.0 | 2.5 | 1.3 | 2.4 | 3.9 | 2.0 | 0.9 | 8.0 | 6.9 | 8.8 | 14.7 | 15.3 | 22.1 | 1.5 | 1.2 |
| MHNCI 2545 | 1 | 27.4 | 8.0 | 8.2 | 2.9 | 2.2 | 1.2 | 2.3 | 3.5 | 2.0 | 0.9 | 7.4 | 5.9 | 8.1 | 13.4 | 14.2 | 19.5 | 1.4 | 1.3 |
| MHNCI 4794 | 1 | 29.2 | 8.1 | 8.0 | 3.0 | 2.1 | 1.2 | 2.8 | 3.2 | 2.0 | 0.9 | 7.5 | 6.0 | 8.0 | 11.6 | 13.9 | 18.8 | 1.1 | 1.0 |
| CHBEZ 146 | 1 | 24.6 | 7.5 | 7.7 | 2.8 | 2.1 | 1.0 | 2.3 | 2.9 | 1.6 | 0.8 | 7.2 | 6.1 | 7.3 | 12.8 | 13.6 | 18.9 | 1.2 | 1.1 |
| CHBEZ 147 | 1 | 23.6 | 7.4 | 7.4 | 2.5 | 2.0 | 1.0 | 2.1 | 3.1 | 1.6 | 0.7 | 7.7 | 5.1 | 7.4 | 12.0 | 12.5 | 17.3 | 1.1 | 1.1 |
| ZUFRJ 7320 | 1 | 26.2 | 7.6 | 8.2 | 2.9 | 2.2 | 1.2 | 2.6 | 3.3 | 2.1 | 1.0 | 7.7 | 6.1 | 8.0 | 13.0 | 14.3 | 19.1 | 1.4 | 1.3 |
| ZUFRJ 7321 | 1 | 27.0 | 8.0 | 8.2 | 2.6 | 2.3 | 1.0 | 2.4 | 3.1 | 1.6 | 1.0 | 7.7 | 5.7 | 8.0 | 12.8 | 15.1 | 19.9 | 1.4 | 1.4 |
| ZUFRJ 7322 | 1 | 26.2 | 8.1 | 8.3 | 2.8 | 2.2 | 1.1 | 2.5 | 3.1 | 1.9 | 0.9 | 7.8 | 6.5 | 8.5 | 12.4 | 14.4 | 19.2 | 1.4 | 1.4 |
| ZUFRJ 7323 | 1 | 26.2 | 7.9 | 8.6 | 2.8 | 2.2 | 1.1 | 2.5 | 3.1 | 1.9 | 1.0 | 7.5 | 5.9 | 8.4 | 12.8 | 14.2 | 19.5 | 1.1 | 1.0 |
| ZUFRJ 7324 | 2 | 32.9 | 9.7 | 9.6 | 3.4 | 2.7 | 1.3 | 2.7 | 3.9 | 1.9 | 1.2 | 9.4 | 7.1 | 10.0 | 16.2 | 17.5 | 23.4 | 1.9 | 1.9 |
| ZUFRJ 7325 | 2 | 33.7 | 8.8 | 10.2 | 3.4 | 2.8 | 1.5 | 2.9 | 3.8 | 2.3 | 1.2 | 9.5 | 8.1 | 10.6 | 17.1 | 18.6 | 26.3 | 2.0 | 1.9 |
| ZUFRJ 7570 | 1 | 26.6 | 8.3 | 8.9 | 3.0 | 2.1 | 1.0 | 2.6 | 2.9 | 1.5 | 1.0 | 8.0 | 6.5 | 9.5 | 14.5 | 15.2 | 22.4 | 1.4 | 1.4 |
| ZUFRJ 7587 | 2 | 35.9 | 10.8 | 11.1 | 3.7 | 2.8 | 1.9 | 3.3 | 4.1 | 2.4 | 1.2 | 10.0 | 8.0 | 11.3 | 17.6 | 18.6 | 26.6 | 2.1 | 1.8 |
| ZUFRJ 7588 | 1 | 27.1 | 8.5 | 9.0 | 3.2 | 2.1 | 1.3 | 2.7 | 3.3 | 1.9 | 1.1 | 7.9 | 6.7 | 8.4 | 13.8 | 14.9 | 19.5 | 1.3 | 1.2 |
| ZUFRJ 7589 | 1 | 27.3 | 8.2 | 8.6 | 2.9 | 2.3 | 1.1 | 2.6 | 3.3 | 1.8 | 0.8 | 8.1 | 6.9 | 8.5 | 13.8 | 14.7 | 19.9 | 1.3 | 1.2 |
| ZUFRJ 7590 | 1 | 26.1 | 8.0 | 8.4 | 2.9 | 2.0 | 1.1 | 2.6 | 2.8 | 1.9 | 1.1 | 7.7 | 6.2 | 8.4 | 13.2 | 14.3 | 19.9 | 1.2 | 1.2 |

**Supplementary Table S3.** Number of individuals of each color pattern of *Dendropsophus elegans* from 109 sampled localities and genetic populations (north, south and contact zone) along BAF characterized by - the dorsal surface of the body: D1 (full rectangle frame); D2 (incomplete rectangle frame close to eye and / or sacral region); D3 (fragmented rectangle frame), upper shank surface: T1 (single and extensive white-yellowish band); T2 (three rounded white-yellow spots); T3 (two yellow-white spots), upper forearm surface: UA1 (immaculate); UA2 (a yellowish-white spot on the elbow); UA3 (two yellowish white patches, one on the elbow and one in the anterior region of the forearm), and muzzle formats in dorsal view: S1 (rounded); S2 (pointy); S3 (truncated). The frequencies of the color patterns are illustrated in Figure 4.

| **Localidade** | **Lat** | **Long** | **Pop** | **D1** | **D2** | **D3** | **UA1** | **UA2** | **UA3** | **T1** | **T2** | **T3** | **S1** | **S2** | **S3** |
| --- | --- | --- | --- | --- | --- | --- | --- | --- | --- | --- | --- | --- | --- | --- | --- |
| Abre Campo - MG | -20.3011111 | -42.4775 | CZ | 0 | 1 | 0 | 1 | 0 | 0 | 0 | 0 | 1 | 1 | 0 | 0 |
| Amargosa, Serra do Timbó - BA | -13.0302778 | -39.604722 | North | 1 | 1 | 0 | 1 | 1 | 0 | 2 | 0 | 0 | 2 | 0 | 0 |
| Angra dos Reis - RJ | -23.0066667 | -44.318056 | South | 2 | 2 | 0 | 4 | 0 | 0 | 4 | 0 | 0 | 0 | 1 | 3 |
| Antonina - PR | -25.4286111 | -48.711944 | South | 5 | 1 | 0 | 4 | 2 | 0 | 6 | 0 | 0 | 0 | 0 | 6 |
| Antônio Dias - MG | -19.6527778 | -42.872222 | CZ | 1 | 0 | 0 | 1 | 0 | 0 | 1 | 0 | 0 | 0 | 0 | 1 |
| Aracruz - ES | -19.8202778 | -40.273333 | CZ | 2 | 0 | 0 | 2 | 0 | 0 | 1 | 1 | 0 | 0 | 0 | 2 |
| Arataca - BA | -15.2633333 | -39.414444 | North | 2 | 2 | 0 | 3 | 1 | 0 | 2 | 1 | 1 | 0 | 0 | 4 |
| Areia Branca - SE | -10.7577778 | -37.315278 | North | 1 | 0 | 0 | 1 | 0 | 0 | 0 | 1 | 0 | 1 | 0 | 0 |
| Baixo Guandu - ES | -19.5188889 | -41.015833 | CZ | 1 | 0 | 0 | 1 | 0 | 0 | 1 | 0 | 0 | 0 | 0 | 1 |
| Barão dos Cocais - MG | -19.9372222 | -43.487222 | North | 2 | 0 | 0 | 2 | 0 | 0 | 2 | 0 | 0 | 0 | 0 | 2 |
| Barra de São João - RJ | -22.5894444 | -41.992778 | South | 36 | 8 | 0 | 39 | 5 | 0 | 30 | 8 | 6 | 27 | 4 | 13 |
| Barra Mansa - RJ | -22.5441667 | -44.171389 | South | 4 | 0 | 0 | 1 | 3 | 0 | 4 | 0 | 0 | 1 | 0 | 3 |
| Barro Branco, Italva - RJ | -21.4208333 | -41.690833 | CZ | 1 | 0 | 0 | 1 | 0 | 0 | 1 | 0 | 0 | 0 | 0 | 1 |
| Bertioga, Boracéia - SP | -23.8544444 | -46.138611 | South | 7 | 0 | 0 | 5 | 0 | 2 | 7 | 0 | 0 | 2 | 0 | 5 |
| Buri - SP | -23.7975 | -48.592778 | South | 6 | 0 | 0 | 6 | 0 | 0 | 6 | 0 | 0 | 4 | 0 | 2 |
| Campo Alegre - AL | -9.7819444 | -36.350833 | North | 2 | 1 | 0 | 2 | 1 | 0 | 2 | 1 | 0 | 1 | 0 | 2 |
| Campos dos Goytacazes - RJ | -21.7541667 | -41.324444 | South | 9 | 2 | 0 | 10 | 1 | 0 | 5 | 2 | 4 | 1 | 0 | 10 |
| Camurujipe, Mata de São João - BA | -12.5391667 | -38.01 | North | 19 | 49 | 0 | 60 | 6 | 2 | 27 | 34 | 9 | 17 | 5 | 46 |
| Caravelas - BA | -17.7319444 | -39.265833 | North | 3 | 0 | 0 | 3 | 0 | 0 | 1 | 2 | 0 | 0 | 0 | 3 |
| Cariacica - ES | -20.2638889 | -40.42 | CZ | 9 | 1 | 0 | 10 | 0 | 0 | 2 | 7 | 1 | 5 | 0 | 5 |
| Chiador - MG | -22.0025 | -43.057778 | CZ | 2 | 0 | 1 | 3 | 0 | 0 | 3 | 0 | 0 | 0 | 0 | 3 |
| Citrolândia, Magé - RJ | -22.6527778 | -43.040556 | South | 5 | 2 | 0 | 6 | 1 | 0 | 7 | 0 | 0 | 0 | 2 | 5 |
| Comendador Levy Gasparin - RJ | -22.0286111 | -43.205 | CZ | 7 | 1 | 0 | 7 | 0 | 1 | 6 | 1 | 1 | 0 | 0 | 8 |
| Conceição da Barra - ES | -18.5933333 | -39.732222 | North | 37 | 6 | 1 | 39 | 5 | 0 | 33 | 9 | 2 | 16 | 0 | 28 |
| Coruripe - AL | -10.1255556 | -36.175556 | North | 1 | 1 | 0 | 1 | 1 | 0 | 0 | 1 | 1 | 1 | 0 | 1 |
| Divisa entre Campos dos Goytacazes – RJ / Mimoso do Sul - ES | -21.2038889 | -41.459722 | CZ | 2 | 0 | 0 | 2 | 0 | 0 | 1 | 1 | 0 | 0 | 1 | 1 |
| Engenheiro Paulo de Frontin - RJ | -22.5497222 | -43.678333 | South | 2 | 1 | 0 | 3 | 0 | 0 | 3 | 0 | 0 | 0 | 0 | 3 |
| Est. Ecol. de Guapiaçu, cachoeira do macuco - RJ | -22.4291667 | -42.750556 | South | 2 | 1 | 0 | 3 | 0 | 0 | 3 | 0 | 0 | 2 | 0 | 1 |
| Est. Ecológica do Bananal, Bananal - SP | -22.6836111 | -44.323333 | South | 4 | 1 | 0 | 3 | 2 | 0 | 5 | 0 | 0 | 0 | 0 | 5 |
| Est. Ecológica Veracruz, Porto Seguro - BA | -16.8080556 | -39.147778 | North | 1 | 21 | 0 | 19 | 3 | 0 | 13 | 6 | 3 | 7 | 1 | 14 |
| Faz. 2 irmãos, Recife - PE | -8.0538889 | -34.881111 | North | 3 | 1 | 0 | 4 | 0 | 0 | 0 | 4 | 0 | 0 | 0 | 4 |
| Faz. Montesclaros, Caratinga - MG | -19.7897222 | -42.139167 | CZ | 3 | 0 | 0 | 3 | 0 | 0 | 0 | 1 | 2 | 0 | 0 | 3 |
| Faz. Santa Mônica, Guarapari - RJ | -20.6743842 | -40.499781 | South | 1 | 0 | 0 | 1 | 0 | 0 | 0 | 1 | 0 | 0 | 0 | 1 |
| Guapimirim - RJ | -22.5372222 | -42.981944 | South | 1 | 0 | 0 | 1 | 0 | 0 | 1 | 0 | 0 | 1 | 0 | 0 |
| Guaraqueçaba - PR | -25.3066667 | -48.328889 | South | 2 | 0 | 0 | 2 | 0 | 0 | 2 | 0 | 0 | 0 | 0 | 2 |
| Iguaba Grande - RJ | -22.8391667 | -42.228889 | South | 1 | 0 | 0 | 1 | 0 | 0 | 1 | 0 | 0 | 0 | 0 | 1 |
| Ilhéus - BA | -14.7888889 | -39.049444 | North | 22 | 4 | 0 | 23 | 3 | 0 | 12 | 9 | 5 | 5 | 0 | 21 |
| Iporanga - SP | -24.5855556 | -48.593056 | South | 5 | 0 | 0 | 5 | 0 | 0 | 5 | 0 | 0 | 2 | 1 | 2 |
| Itabuna - BA | -14.7855556 | -39.280278 | North | 0 | 1 | 0 | 1 | 0 | 0 | 1 | 0 | 0 | 0 | 0 | 1 |
| Itagibá - BA | -14.2836111 | -39.842778 | North | 3 | 0 | 0 | 3 | 0 | 0 | 2 | 1 | 0 | 0 | 0 | 3 |
| Itanhaém - SP | -24.1830556 | -46.788889 | South | 2 | 0 | 0 | 2 | 0 | 0 | 2 | 0 | 0 | 0 | 0 | 2 |
| Itaperuna - RJ | -21.205 | -41.887778 | CZ | 10 | 0 | 0 | 10 | 0 | 0 | 4 | 5 | 1 | 2 | 0 | 8 |
| Itapetinga - BA | -15.2488889 | -40.247778 | North | 1 | 0 | 0 | 1 | 0 | 0 | 1 | 0 | 0 | 0 | 0 | 1 |
| Ituberá - BA | -13.7322222 | -39.149167 | North | 2 | 13 | 0 | 10 | 5 | 0 | 3 | 10 | 1 | 3 | 0 | 12 |
| Jardim Botânico, Niterói - RJ | -22.8833333 | -43.103611 | South | 3 | 0 | 0 | 3 | 0 | 0 | 2 | 1 | 0 | 2 | 0 | 1 |
| Juiz de Fora - MG | -21.7641667 | -43.350278 | CZ | 1 | 0 | 0 | 1 | 0 | 0 | 1 | 0 | 0 | 1 | 0 | 0 |
| Linhares - ES | -19.3911111 | -40.072222 | North | 14 | 2 | 1 | 13 | 3 | 1 | 13 | 4 | 0 | 4 | 1 | 12 |
| Mairi - BA | -11.7113889 | -40.148889 | North | 1 | 1 | 0 | 1 | 1 | 0 | 0 | 2 | 0 | 1 | 1 | 0 |
| Mamanguape - PB | -6.8386111 | -35.126111 | North | 4 | 0 | 0 | 4 | 0 | 0 | 0 | 4 | 0 | 0 | 0 | 4 |
| Mangaratiba - RJ | -22.9597222 | -44.040556 | South | 1 | 0 | 0 | 1 | 0 | 0 | 1 | 0 | 0 | 0 | 0 | 1 |
| Mariana - MG | -20.3777778 | -43.416111 | North | 41 | 2 | 3 | 43 | 3 | 0 | 39 | 6 | 1 | 2 | 5 | 39 |
| Maricá - RJ | -22.9194444 | -42.818611 | South | 29 | 0 | 0 | 27 | 1 | 1 | 27 | 1 | 1 | 14 | 5 | 10 |
| Marliéria - MG | -19.7119444 | -42.732222 | North | 20 | 4 | 4 | 27 | 0 | 1 | 15 | 11 | 2 | 0 | 1 | 27 |
| Mascote - BA | -15.5630556 | -39.3025 | North | 2 | 0 | 0 | 2 | 0 | 0 | 1 | 1 | 0 | 0 | 0 | 2 |
| Miracatu - SP | -24.2813889 | -47.459722 | South | 30 | 0 | 0 | 22 | 8 | 0 | 30 | 0 | 0 | 14 | 1 | 15 |
| Moji das Cruzes - SP | -23.5227778 | -46.188333 | South | 3 | 0 | 0 | 3 | 0 | 0 | 3 | 0 | 0 | 1 | 0 | 2 |
| Morretes - PR | -25.4769444 | -48.834444 | South | 35 | 1 | 0 | 26 | 10 | 0 | 36 | 0 | 0 | 6 | 0 | 30 |
| Muniz Freire - ES | -20.4641667 | -41.413056 | CZ | 2 | 0 | 1 | 3 | 0 | 0 | 0 | 2 | 1 | 0 | 0 | 3 |
| Ouro Preto - MG | -20.2875 | -43.508056 | North | 0 | 1 | 0 | 1 | 0 | 0 | 0 | 1 | 0 | 1 | 0 | 0 |
| Pariquer-açu - SP | -24.715 | -47.881111 | South | 4 | 1 | 0 | 5 | 0 | 0 | 3 | 2 | 0 | 2 | 3 | 0 |
| Parna Itatiaia - RJ | -22.4961111 | -44.563333 | South | 0 | 1 | 0 | 1 | 0 | 0 | 1 | 0 | 0 | 0 | 0 | 1 |
| Parque do Zizo, São Miguel Arcanjo - SP | -23.8783333 | -47.997222 | South | 40 | 1 | 0 | 38 | 0 | 3 | 41 | 0 | 0 | 7 | 1 | 34 |
| Peçanha - MG | -18.5486111 | -42.556944 | North | 1 | 0 | 0 | 1 | 0 | 0 | 1 | 0 | 0 | 0 | 1 | 0 |
| Pedra Azul - MG | -16.0052778 | -41.297222 | North | 1 | 0 | 0 | 1 | 0 | 0 | 0 | 1 | 0 | 0 | 0 | 1 |
| PETAR - SP | -24.5094444 | -48.8425 | South | 6 | 0 | 0 | 6 | 0 | 0 | 6 | 0 | 0 | 0 | 0 | 6 |
| Picinguaba, Ubatuba - SP | -23.3769444 | -44.838056 | South | 29 | 1 | 0 | 29 | 1 | 0 | 30 | 0 | 0 | 2 | 1 | 27 |
| Pq. Florestal Estadual do Rio Doce, Marliéria - MG | -19.8427778 | -42.776667 | North | 22 | 3 | 0 | 23 | 2 | 0 | 9 | 13 | 3 | 0 | 0 | 25 |
| Pq. Nacional Restinga de Jurubatiba, Quissamã - RJ | -22.1066667 | -41.472222 | South | 2 | 0 | 0 | 2 | 0 | 0 | 1 | 1 | 0 | 0 | 0 | 2 |
| Pq. Nacional Taquara, Duque de Caxias - RJ | -22.7855556 | -43.311667 | South | 24 | 3 | 0 | 23 | 4 | 0 | 27 | 0 | 0 | 2 | 0 | 25 |
| Prado - BA | -17.3411111 | -39.220833 | North | 12 | 1 | 0 | 13 | 0 | 0 | 8 | 4 | 1 | 2 | 0 | 11 |
| Pratigi, Taperoá - BA | -13.5380556 | -39.098611 | North | 1 | 1 | 0 | 2 | 0 | 0 | 1 | 1 | 0 | 0 | 1 | 1 |
| Quebrangulo - AL | -9.3188889 | -36.471111 | North | 10 | 1 | 0 | 6 | 5 | 0 | 4 | 7 | 0 | 1 | 0 | 10 |
| Rebio União, Macaé - RJ | -22.3708333 | -41.786944 | South | 20 | 3 | 0 | 19 | 4 | 0 | 13 | 9 | 1 | 6 | 1 | 16 |
| Resende - RJ | -22.4688889 | -44.446667 | South | 3 | 1 | 0 | 4 | 0 | 0 | 4 | 0 | 0 | 3 | 0 | 1 |
| Reserva Peninha, Cachoeira - BA | -12.6183333 | -38.955833 | North | 3 | 2 | 0 | 5 | 0 | 0 | 4 | 1 | 0 | 1 | 1 | 3 |
| Rio das Ostras - RJ | -22.5269444 | -41.945 | South | 7 | 2 | 0 | 9 | 0 | 0 | 5 | 4 | 0 | 9 | 0 | 0 |
| Rio de Janeiro - RJ | -22.9027778 | -43.2075 | South | 17 | 6 | 0 | 23 | 0 | 0 | 22 | 1 | 0 | 10 | 0 | 13 |
| Rio Novo - MG | -21.4575 | -43.125278 | CZ | 2 | 0 | 0 | 2 | 0 | 0 | 2 | 0 | 0 | 1 | 0 | 1 |
| Roça Grande - MG | -21.57970017 | -42.979461 | CZ | 7 | 0 | 0 | 7 | 0 | 0 | 7 | 0 | 0 | 3 | 2 | 2 |
| Santa Maria Madalena - RJ | -21.9552778 | -42.008056 | South | 8 | 1 | 0 | 9 | 0 | 0 | 5 | 4 | 0 | 2 | 0 | 7 |
| Santa Rita de Ibitipoca - MG | -21.5627778 | -43.914722 | CZ | 27 | 1 | 0 | 16 | 12 | 0 | 10 | 18 | 0 | 14 | 4 | 10 |
| Santa Teresa - ES | -19.9355556 | -40.600278 | CZ | 11 | 5 | 1 | 14 | 1 | 2 | 5 | 11 | 1 | 6 | 0 | 11 |
| São Franscisco Itabapoana - RJ | -21.3019444 | -40.961389 | CZ | 1 | 0 | 0 | 1 | 0 | 0 | 1 | 0 | 0 | 1 | 0 | 0 |
| São Gonçalo do Rio Abaixo - MG | -19.8261111 | -43.362222 | North | 17 | 2 | 0 | 19 | 0 | 0 | 17 | 2 | 0 | 15 | 0 | 4 |
| São João Nepomuceno - MG | -21.54 | -43.010556 | CZ | 2 | 0 | 0 | 2 | 0 | 0 | 2 | 0 | 0 | 0 | 0 | 2 |
| São José Delmiro Braga - MG | -21.9486111 | -43.415 | CZ | 1 | 0 | 0 | 1 | 0 | 0 | 1 | 0 | 0 | 0 | 0 | 1 |
| São Jozé da Lage - AL | -9.0097222 | -36.058333 | North | 1 | 1 | 0 | 0 | 2 | 0 | 1 | 1 | 0 | 0 | 0 | 2 |
| São Mateus - ES | -18.7161111 | -39.858889 | North | 2 | 1 | 0 | 3 | 0 | 0 | 2 | 1 | 0 | 0 | 0 | 3 |
| Saquarema - RJ | -22.92 | -42.510278 | South | 3 | 0 | 0 | 3 | 0 | 0 | 3 | 0 | 0 | 2 | 0 | 1 |
| Seropédica - RJ | -22.7438889 | -43.7075 | South | 3 | 0 | 0 | 3 | 0 | 0 | 3 | 0 | 0 | 2 | 1 | 0 |
| Serra da Caraça, Catas Altas - MG | -20.0747222 | -43.4075 | North | 8 | 1 | 0 | 9 | 0 | 0 | 6 | 3 | 0 | 1 | 0 | 8 |
| Serra do Teimoso, Jussari - BA | -15.1913889 | -39.495278 | North | 1 | 0 | 0 | 1 | 0 | 0 | 0 | 0 | 1 | 1 | 0 | 0 |
| Serra do Timorante, Valentin, Boa Nova - BA | -14.3625 | -40.2075 | North | 3 | 0 | 0 | 2 | 1 | 0 | 1 | 1 | 1 | 1 | 0 | 2 |
| Silva Jardim - RJ | -22.6508333 | -42.391667 | South | 1 | 0 | 0 | 1 | 0 | 0 | 1 | 0 | 0 | 0 | 0 | 1 |
| Sooretama - ES | -19.1977778 | -40.097778 | North | 18 | 5 | 1 | 22 | 1 | 1 | 16 | 7 | 1 | 10 | 0 | 14 |
| Tanguá - RJ | -22.7302778 | -42.714167 | South | 9 | 0 | 0 | 9 | 0 | 0 | 9 | 0 | 0 | 0 | 0 | 9 |
| Tapiraí - SP | -23.9636111 | -47.507222 | South | 6 | 2 | 0 | 8 | 0 | 0 | 8 | 0 | 0 | 2 | 0 | 6 |
| Teixeira de Freitas -BA | -17.535 | -39.741944 | North | 1 | 0 | 0 | 1 | 0 | 0 | 1 | 0 | 0 | 1 | 0 | 0 |
| Teófilo Otoni - MG | -17.8575 | -41.505278 | North | 6 | 0 | 0 | 3 | 3 | 0 | 6 | 0 | 0 | 2 | 0 | 4 |
| Timbó - SC | -26.8233333 | -49.271667 | South | 0 | 1 | 0 | 0 | 1 | 0 | 0 | 1 | 0 | 0 | 0 | 1 |
| Tinguá, Nova Iguaçu - RJ | -22.7591667 | -43.451111 | South | 5 | 1 | 0 | 6 | 0 | 0 | 6 | 0 | 0 | 1 | 0 | 5 |
| Trancoso - BA | -16.4497222 | -39.064722 | North | 4 | 1 | 0 | 5 | 0 | 0 | 3 | 2 | 0 | 4 | 0 | 1 |
| Três Rios - RJ | -22.1166667 | -43.209167 | CZ | 10 | 0 | 0 | 9 | 1 | 0 | 9 | 0 | 1 | 2 | 1 | 7 |
| UHE de Fumaça, Diogo de Vasconcelos - MG | -20.4877778 | -43.198333 | North | 0 | 1 | 0 | 1 | 0 | 0 | 1 | 0 | 0 | 0 | 1 | 0 |
| Una - BA | -15.2933333 | -39.075278 | North | 3 | 1 | 0 | 3 | 1 | 0 | 1 | 2 | 1 | 0 | 0 | 4 |
| Valença - BA | -13.3702778 | -39.073056 | North | 1 | 1 | 0 | 2 | 0 | 0 | 2 | 0 | 0 | 0 | 0 | 2 |
| Veracel, Porto Seguro - BA | -16.4497222 | -39.064722 | North | 21 | 1 | 0 | 20 | 5 | 0 | 9 | 9 | 4 | 6 | 0 | 16 |
| Viana, Faz. Campo Verde - ES | -20.3902778 | -40.496111 | CZ | 4 | 0 | 0 | 4 | 0 | 0 | 1 | 2 | 1 | 2 | 0 | 2 |
| Viçosa - MG | -20.7538889 | -42.881944 | CZ | 12 | 0 | 0 | 12 | 0 | 0 | 11 | 1 | 0 | 2 | 0 | 10 |

**Supplementary Table S4.** Descriptive Statistics (mean ± standard error, maximum and minimum value for each variable, and total sample size) of *Dendropsophus elegans* adults males and females from the north, contact zone and south populations with the 18 morphometric distances: SVL (snout-vent length), HL (head length), HW (head width), ED (eye diameter), END (eye-nostril distance), TD (tympanum diameter), UEW (upper eyelid width), IOD (interorbital distance), IND (internarial distance), NSD (nostril-tip of snout distance), HU (humerus length), RUL (radius-ulna length), HAL (hand length), THL (thigh length), TL (tibia length), FL (foot length, including tarsus), 3FD (third finger disc diameter), and 4TD (fourth toe disc diameter).

|  | **Contact Zone** | | **North** | | | **South** | | |
| --- | --- | --- | --- | --- | --- | --- | --- | --- |
|  | Female | Male | | Female | Male | | Female | Male |
| SVL | 29.88±3.87  36.4-23.3 | 26.59±1.72  37.4-23.8 | | 31.56±3.28  39.1-22.9 | 26.65±1.93  33.7-22.6 | | 31.67±2.99  36.6-22.9 | 26.24±1.35  29.8-21.1 |
| HL | 8.75±1.28  10.9-5.6 | 8.11±0.46  10.3-7.2 | | 9.53±0.98  11.6-5.6 | 8.20±0.64  10.2-6.3 | | 9.56±0.92  11.5-7.2 | 7.95±0.48  9.3-6.1 |
| HW | 9.16±1.07  11.0-7.4 | 8.36±0.49  10.6-7.5 | | 9.81±1.02  11.7-7.2 | 8.48±0.74  10.6-7.0 | | 9.86±0.98  11.6-7.2 | 8.23±0.42  9.4-7.1 |
| ED | 3.21±0.46  4.3-2.6 | 3.02±0.31  4.3-2.5 | | 3.33±0.38  4.5-2.4 | 3.05±0.34  4.4-2.4 | | 3.28±0.28  3.9-2.7 | 3.00±0.22  4.0-2.1 |
| UEW | 2.65±0.38  3.6-2.2 | 2.50±0.26  3.3-1.8 | | 2.76±0.42  4.5-1.9 | 2.55±0.36  4.3-1.6 | | 2.76±0.34  3.6-2.0 | 2.47±0.27  3.6-1.4 |
| IND | 2.15±0.24  2.8-1.8 | 1.89±0.22  2.9-1.4 | | 2.25±0.31  3.1-1.5 | 1.96±0.29  3.1-1.3 | | 2.16±0.26  3-1.5 | 1.85±0.19  2.6-1.1 |
| NSD | 1.09±0.15  1.4-0.8 | 0.95±0.11  1.4-0.7 | | 1.14±1.14  1.8-0.7 | 0.95±0.16  1.8-0.6 | | 1.12±0.20  1.8-0.8 | 1.92±0.11  1.4-0.6 |
| HU | 8.79±0.99  10.-6.6 | 7.57±0.44  8.9-6.5 | | 98.91±0.87  10.9-6.4 | 7.64±0.61  9.4-6.1 | | 8.74±0.746  10.3-6.4 | 7.32±0.48  8.6-4.5 |
| RUL | 6.68±0.78  7.6-5.2 | 6.11±0.37  7.8-5.4 | | 7.15±0.74  9-5.2 | 6.20±0.51  8.2-5.1 | | 7.27±0.70  8.6-5.2 | 6.18±0.41  7.4-5.1 |
| HAL | 9.48±1.14  11.3-7.1 | 8.32±0.48  10.4-6.8 | | 9.84±1.09  11.8-7.1 | 8.29±1.00  22.2-6.6 | | 9.92±1.13  11.6-7.1 | 8.17±0.52  9.5-6.9 |
| THL | 15.17±1.80  17.8-11.7 | 13.20±0.70  16-11.6 | | 15.57±1.8  19.9-4.5 | 13.47±1.04  16.6-10.2 | | 15.21±1.64  17.5-4.5 | 13.14±0.72  15.5-10.6 |
| TL | 16.02±1.78  18.5-12.3 | 13.90±0.75  16.8-12.3 | | 16.76±1.65  20.2-12.3 | 14.34±1.16  18.8-11.6 | | 16.63±1.64  19.9-12.3 | 13.91±0.72  15.8-11.7 |
| FL | 22.39±2.52  25.9-17.2 | 19.31±1.10  24.4-16.9 | | 24.33±3.63  54.5-15.7 | 19.69±1.54  25.4-15.7 | | 23.24±2.66  27-15.7 | 19.19±1.27  22.7-8.9 |
| 3FD | 1.66±0.36  2.2-1.1 | 1.42±0.15  2-1.1 | | 1.74±0.35  2.6-1.0 | 1.39±0.23  2.4-0.8 | | 1.70±0.32  2.3-1.0 | 1.33±0.15  2.1-1.0 |
| 4TD | 1.50±0.33  2.1-1.0 | 1.32±0.14  1.9-1.0 | | 1.58±0.30  2.3-1.0 | 1.29±0.22  2.3-0.9 | | 1.53±0.29  2.1-1.0 | 1.23±0.14  1.6-0.9 |
| Total | 20 | 100 | | 142 | 402 | | 59 | 375 |

**
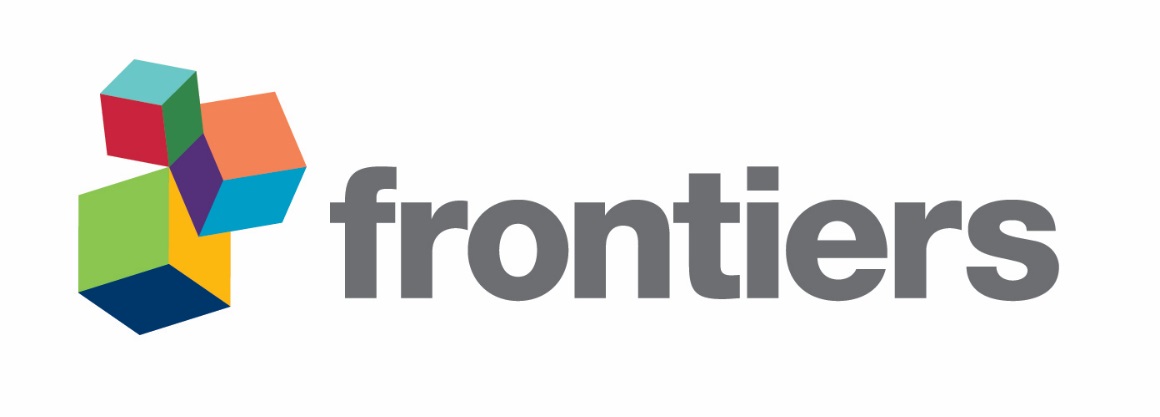
**
